# Supplementary material for: Photocatalytic aerobic oxidative cleavage of olefins in pure water
Source: Royal Society of Chemistry journal article supplement (doi:10.1039/d5cy01371b), 2025-12-26

# Photocatalytic Aerobic Oxidative Cleavage of Olefins in Pure Water

Tengfei Niu\*, Yang Yang, Feiyan Zhang, Shengjun Chen, Yingxin Guo, Yan Li,  
Bangqing Ni, Yuming Dong\*

---

Prof. Dr. T. Niu, Ms. Y. Yang, Ms. F. Zhang, Mr. S. Chen, Dr. Y. Guo, Ms. Y. Li, Prof. B. Ni,  
Prof. Dr. Y. Dong

International Joint Research Center for Photo-responsive Molecules and Materials, Key  
Laboratory of Synthetic and Biological Colloids, School of Chemical and Material Engineering,  
Jiangnan University, Wuxi 214122, P. R. China

\*E-mail: dongym@jiangnan.edu.cn; niutf@jiangnan.edu.cn

## Content Table

|                                                |       |
|------------------------------------------------|-------|
| General Methods .....                          | 2     |
| Supplementary Figure .....                     | 4-6   |
| Details optimization reaction conditions ..... | 9-8   |
| Supplementary Data .....                       | 10-9  |
| NMR Spectra of Products.....                   | 12-15 |
| NMR Spectra.....                               | 19-56 |

## General Methods

All chemicals were commercially available and used without further purification. Analytical thin-layer chromatography was performed on glass plates precoated with silica gel impregnated with a fluorescent indicator (254 nm). The plates were visualized by exposure to ultraviolet light.  $^1\text{H}$  NMR spectra were recorded on Bruker DRX (400 MHz) and  $^{13}\text{C}$  NMR spectra on Bruker DRX (100 MHz) spectrometer. Mass spectra were taken on a Finnigan TSQ Quantum-MS instrument in the electrospray ionization (ESI) mode. Elemental analyses were performed on a Yanagimoto MT3CHN recorder.

## Materials

Melamine ( $\text{C}_3\text{H}_6\text{N}_6$ , 99%), hydrochloric acid (HCl 37%), iron (II) sulfate heptahydrate ( $\text{FeSO}_4 \cdot 7\text{H}_2\text{O}$ , 99%), sodium iodate ( $\text{NaIO}_3$ , 99%), iron (III) chloride hexahydrate ( $\text{FeCl}_3 \cdot 6\text{H}_2\text{O}$ , 99%), sodium acetate anhydrous ( $\text{CH}_3\text{COONa}$ , 99%), absolute ethyl alcohol ( $\text{C}_2\text{H}_5\text{OH}$ ), and deionized water. All reagents were used without further purification.

## Synthesis of p-g- $\text{C}_3\text{N}_4$ composites

Porous g- $\text{C}_3\text{N}_4$  (p-g- $\text{C}_3\text{N}_4$ ) were synthesized according to the methods in the literature.<sup>19</sup> First melamine hydrochloride was synthesized by reacting melamine with hydrochloric acid. Then melamine hydrochloride was heated at 500 °C for 2 h in static air with a ramp rate of 20 °C min<sup>-1</sup>. After that, the powder followed by a further heat treatment at 520 °C for 2 h. The resultant yellow powder was named as p-g- $\text{C}_3\text{N}_4$ .

## Synthesis of the photo-catalyst composites

$\text{FeO}_x/\text{C}_3\text{N}_4\text{-P}$  was produced by photo-oxidation deposition. In detail, 20 mg of p-g- $\text{C}_3\text{N}_4$  was added in a mixture solution of 2 mL  $\text{FeSO}_4$  aqueous solution (0.1 M), 2 mL  $\text{NaIO}_3$  aqueous solution (0.2 M) and 16 mL deionized water. Then, the mixture was degassed by nitrogen about 40 min. Subsequently, this suspension was stirred and irradiated with a 300 W Xe lamp. At last, the product was washed several times with water and alcohol, and dried with nitrogen gas. The final samples by photo-deposition for 1 h, 2 h, 3 h, 4 h were denoted as  $\text{FeO}_x/\text{C}_3\text{N}_4\text{-P1}$ ,  $\text{FeO}_x/\text{C}_3\text{N}_4\text{-P2}$ ,  $\text{FeO}_x/\text{C}_3\text{N}_4\text{-P3}$ ,  $\text{FeO}_x/\text{C}_3\text{N}_4\text{-P4}$ , respectively. The synthesis pathways of  $\text{CoO}_x/\text{C}_3\text{N}_4\text{-P3}$  and  $\text{MnO}_x/\text{C}_3\text{N}_4\text{-P3}$  were as the same as  $\text{FeO}_x/\text{C}_3\text{N}_4\text{-P}$ , using  $\text{CoSO}_4 \cdot 7\text{H}_2\text{O}$  and  $\text{MnSO}_4 \cdot \text{H}_2\text{O}$  as reagent instead of  $\text{FeSO}_4$ . The  $\text{FeO}_x/\text{C}_3\text{N}_4\text{-H}$  was synthesized through oil bath. The synthesis pathways of this sample were as the same as  $\text{FeO}_x/\text{C}_3\text{N}_4\text{-P}$ , except for illumination. The experiment was heated at 50 °C. And then the product was washed several times and dried with nitrogen gas. The final samples were named as

$\text{FeO}_x/\text{C}_3\text{N}_4\text{-H}$  The  $\text{FeO}_x/\text{C}_3\text{N}_4\text{-C}$  nanoplates were fabricated based on the literature report.<sup>[2]</sup> First, 8.0 mmol of  $\text{FeCl}_3$  was dissolved into a beaker which containing 80 mL ethanol and 5.6 mL water under stirring. Then 6.4 g of sodium acetate was added into the  $\text{FeCl}_3$  solution with stirring. Subsequently, the homogenous solution was transferred into a 100 mL Teflon-lined and heated at 180 °C for 12 h. The resulting product was washed with water and ethanol several times, and dried at 80 °C overnight.

#### **The photocatalytic oxidative cleavage of C=C bonds**

A 25 mL clean and dry Schlenk reaction tube with a magnetic stirring rotor was equipped with styrene (1 mmol),  $\text{FeO}_x/\text{C}_3\text{N}_4\text{-P}$  (20 mg) and water (2 mL). The mixture was irradiated under sunlight or Xe lamp (250 W) (the distance of the reaction vial from the lamp is about 6 centimeters) with an oxygen ball for 6 h. The reaction vial cooled by an electric fan at room temperature (approximately 27 °C). After the reaction, the solvent was removed under reduced pressure. Purification of the crude product was achieved by flash column chromatography using petrol n-hexane/ethyl acetate (8:1~16:1) as eluent, and the collected product was evaporated and concentrated in the oven (60 °C) for further drying and weighing.

#### **In situ attenuated total reflection infrared spectroscopy experimental method**

The as-prepared photocatalyst (5 mg) was uniformly dispersed in a Nafion-ethanol solution via ultrasonication for 15 min. Subsequently, 0.1 mL of the suspension was drop-cast onto the in-situ IR reaction cell and dried under ambient conditions. The photocatalyst-loaded cell was then filled with 20 mL of  $\text{O}_2$ -saturated aqueous styrene solution (0.1 M). Prior to light irradiation, background spectra were recorded in the dark (64 scans, 8  $\text{cm}^{-1}$  resolution) under continuous  $\text{O}_2$  purging (5 mL/min). Photocatalytic reactions were initiated using a 300 W Xe lamp ( $\lambda > 420 \text{ nm}$ , 100  $\text{mW}/\text{cm}^2$ ) with simultaneous  $\text{O}_2$  flow (5 mL/min). Time-dependent IR spectra were acquired at 5-min intervals for 30 min to monitor the evolution of characteristic vibrational bands. Control experiments were systematically performed using  $\text{FeO}_x$ -free g- $\text{C}_3\text{N}_4$  and catalyst-free blank systems under identical conditions. All spectral data were processed using Kubelka-Munk transformation to ensure quantitative comparability.

#### **Sample characterization**

The X-ray powder diffraction (XRD) patterns were measured on a D8 X-ray diffractometer (Bruker AXS, German). The UV-vis absorption spectra were evaluated by the UV-3600 spectrophotometer (Shimadzu, Japan). X-ray photoelectron spectroscopy (XPS) was carried out by the ESCALAB 250 Xi (Thermo, USA) X-

ray photoelectron spectrometer with the Al K $\alpha$  line as the excitation source ( $h\nu = 1484.8$  eV). TEM (HRTEM) images of samples were determined by JEM-2100 transmission electron microscope (JEOL, Japan) to research the size and lattice stripes of photo-catalyst. The pore size distribution and specific surface area data were measured by N<sub>2</sub> physisorption isotherms on a Micromeritics ASAP 2020 instrument. The photoluminescence (PL) spectra was measured by using the fluorescence spectrophotometer (Cary Eclipse, Varian, USA). The surface photo-voltage (SPV) was collected by a self-developed device. The time-resolved PL emission spectra (375 nm excitation) was performed on a fluorescence spectrophotometer (Edinburgh Instruments, FLS980). The actual chemical composition of the photo-catalyst examined by ICP-MS using a PerkinElmer NexION 300X. The contact angle was performed on an OCA 40 contact angle measuring instruments (Beijing Eastern-Dataphy Instruments Co., Ltd.).

### Supplementary Figure

XRD patterns was determined to provide the phase structures information for p-g-C<sub>3</sub>N<sub>4</sub> and photo-catalyst composites (**Figure S1a**). Both p-g-C<sub>3</sub>N<sub>4</sub> and FeO<sub>x</sub>/C<sub>3</sub>N<sub>4</sub>-P3 had distinct diffraction peaks at 27.4° which can be indexed to graphitic materials as the (002) crystal plane of p-g-C<sub>3</sub>N<sub>4</sub>. By comparing p-g-C<sub>3</sub>N<sub>4</sub> and FeO<sub>x</sub>/C<sub>3</sub>N<sub>4</sub>-P, the diffraction peaks at 35.7° and 54° can be observed, which was corresponding to Fe<sub>2</sub>O<sub>3</sub>, respectively. There were some difference between the FeO<sub>x</sub>/C<sub>3</sub>N<sub>4</sub>-H and FeO<sub>x</sub>/C<sub>3</sub>N<sub>4</sub>-P3 samples, indicating that the important role of photo deposition. Besides, the peak at the position of 13.0° was disappeared, suggesting the changes of crystal structure should not be neglected, which was further revealed that FeO<sub>x</sub> photo-oxidation deposition at the surface of p-g-C<sub>3</sub>N<sub>4</sub>. The optical properties (**Figure S1b**) and electronic band structures (**Figure S6**) of the prepared photocatalysts were investigated by UV-vis diffuse reflectance spectra (DRS). Obviously, the p-g-C<sub>3</sub>N<sub>4</sub> had an absorption edge of 450 nm, with the calculated band gaps approximately about 2.80 eV. The CB and VB of p-g-C<sub>3</sub>N<sub>4</sub> lie at -1.0 and 1.8 eV, respectively. Compared with pure p-g-C<sub>3</sub>N<sub>4</sub>, FeO<sub>x</sub>-B displays a wide light absorption ranging up to 660 nm, resulting from its intrinsic narrow bandgap of 2.02 eV. In addition, the absorption edges of the FeO<sub>x</sub>/C<sub>3</sub>N<sub>4</sub>-P3 were considerably red-shifted to longer wavelengths about at 600 nm, which will result in higher photocatalytic activities of FeO<sub>x</sub>/C<sub>3</sub>N<sub>4</sub>-P3 hetero-structure.

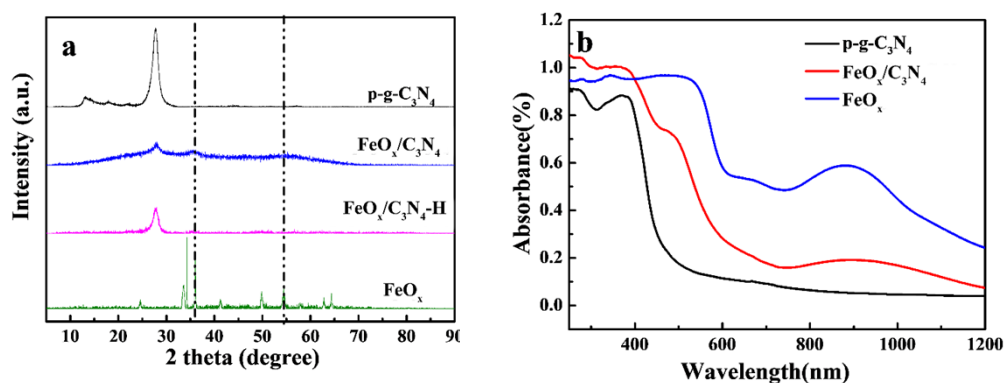

**Supplementary Figure 1.** (a) XRD patterns and (b) diffuse reflectance UV-vis spectra of p-g-C<sub>3</sub>N<sub>4</sub>, Fe<sub>2</sub>O<sub>3</sub>/C<sub>3</sub>N<sub>4</sub>-P, Fe<sub>2</sub>O<sub>3</sub>-H/p-g-C<sub>3</sub>N<sub>4</sub> and Fe<sub>2</sub>O<sub>3</sub>-B composites.

X-ray photoelectron spectroscopy was employed to analyse the chemical composition of the FeO<sub>x</sub>/C<sub>3</sub>N<sub>4</sub>-P3 photo-catalyst. The high-resolution XPS spectrum of Fe 2p (**Figure S2a**) can be presented two peaks at 711.4 and 724.0 eV which can be consistent with Fe 2p<sub>3/2</sub> and Fe 2p<sub>1/2</sub>, respectively. The O 1s peaks at 532.0 and 529.8 eV which are respectively assigned to the lattice oxygen and surface hydroxyl groups (**Figure S2b**). The XPS spectrum of C 1s and N 1s which can be ascribed to the p-g-C<sub>3</sub>N<sub>4</sub>. The peaks of C 1s (**Figure S2c**) at 285.0 eV and 288.2 eV were attributed to surface adventitious carbon and C–N–C coordination, respectively. The N 1s XPS spectrum of the p-g-C<sub>3</sub>N<sub>4</sub> sample (**Figure S2d**) were located at 398.7 eV and 400.5 eV, which corresponding to the C–N–C groups and tertiary nitrogen N–C<sub>3</sub> groups.

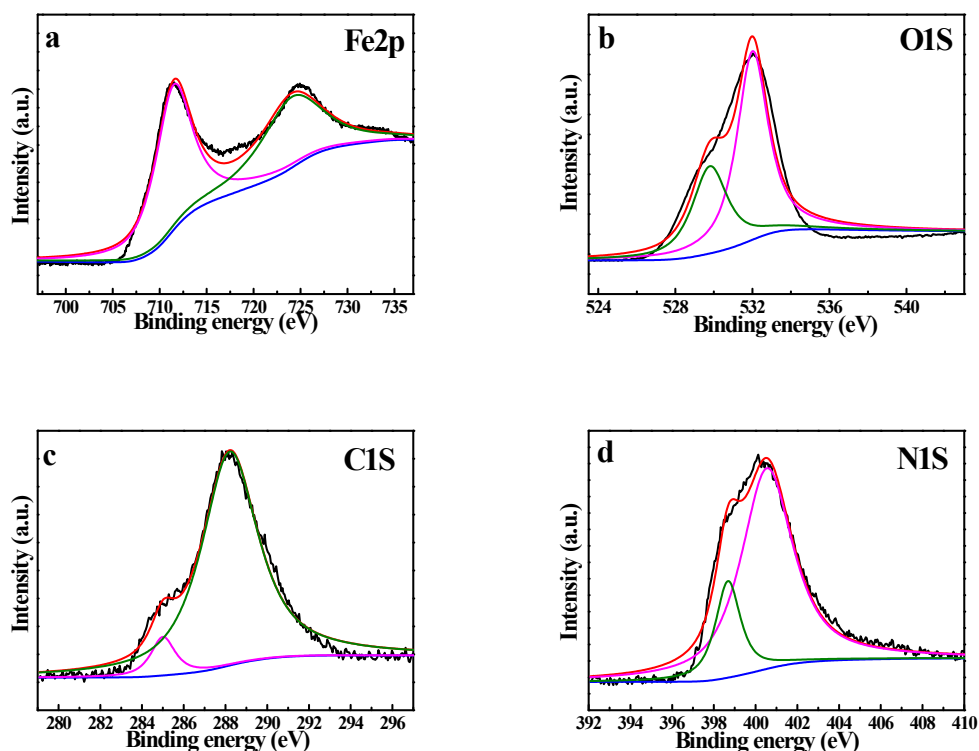

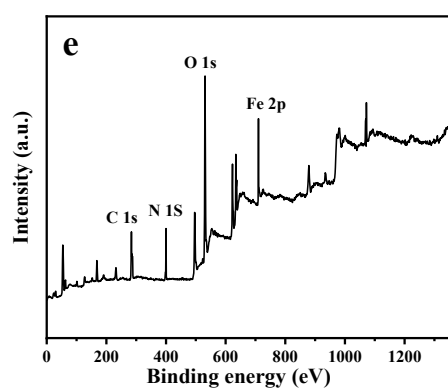

**Supplementary Figure 2.** XPS high-resolution spectrum of (a) Fe 2p, (b) O 1s, (c) C 1s, (d) N 1s of the  $\text{FeO}_x/\text{p-g-C}_3\text{N}_4$  sample.

The transmission electron microscopy (TEM) images of the samples are shown in **Figure S3**. As shown in **Figure S3a and b**, the p-g- $\text{C}_3\text{N}_4$  sample was composed numerous mesopores of one hundred of nanometres in size, revealing the successful porousification in p-g- $\text{C}_3\text{N}_4$ . The TEM images (**Figure S3c and S3d**) displayed that  $\text{FeO}_x$  nanoplates successfully deposited on the surface of p-g- $\text{C}_3\text{N}_4$  nanosheets. The HRTEM image showed crystalline with a lattice fringe spacing of 0.355 nm, which matched the spacing of the  $\text{FeO}_x$  lattice (101). And the content of  $\text{FeO}_x$  in the  $\text{FeO}_x/\text{C}_3\text{N}_4\text{-P3}$  sample was calculated to be about 38.2 wt% (obtained by ICP-MS test). Through the result of TEM, the  $\text{FeO}_x$  are deposited on the surface of margin of p-g- $\text{C}_3\text{N}_4$ , leading to the formation of a hetero-structure interface.

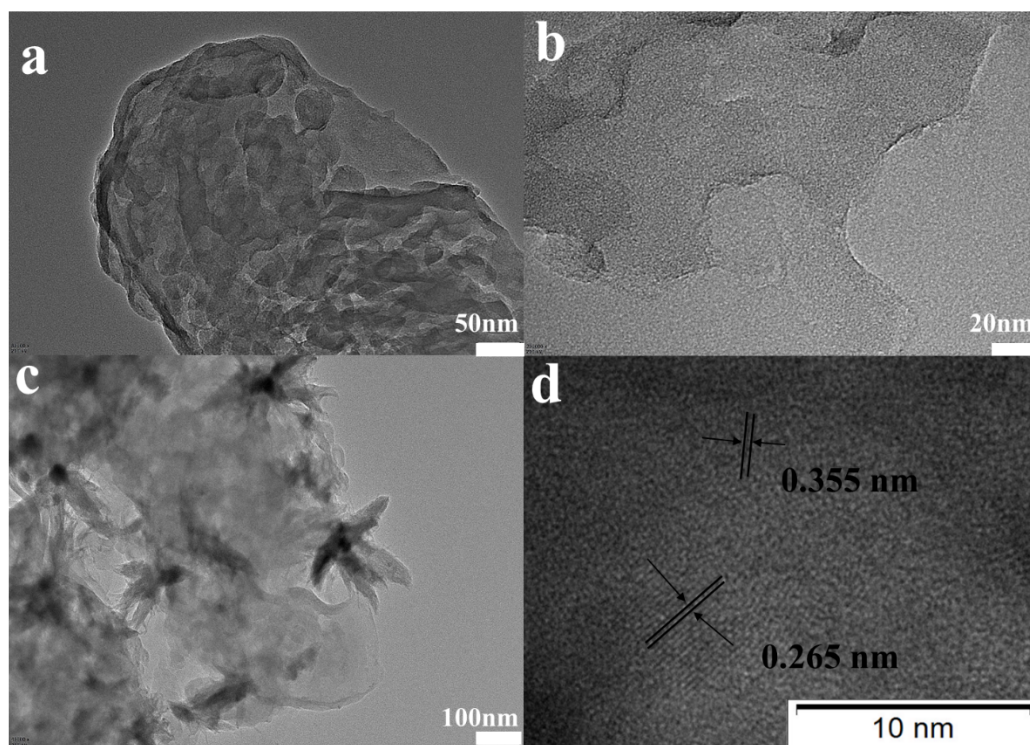

**Supplementary Figure 3.** (a and b) TEM of p-g- $\text{C}_3\text{N}_4$ . (c and d) TEM and HRTEM images of  $\text{FeO}_x/\text{C}_3\text{N}_4\text{-P3}$  sample.

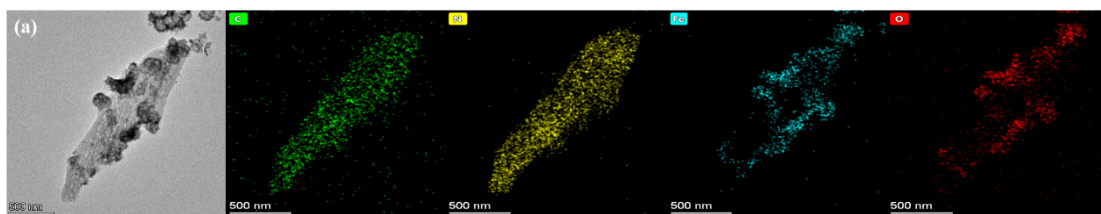

**Supplementary Figure 4.** The corresponding TEM elemental mapping images of elemental C, N, Fe, and O in the marked area.

The elemental mapping images (Figure S4) clearly demonstrate that elements C, N, Fe, and O are evenly distributed in  $\text{FeO}_x/\text{C}_3\text{N}_4\text{-P3}$  sample.

The nitrogen ( $\text{N}_2$ ) adsorption–desorption isotherms were measured and analyzed to characterize the textural properties of the samples (**Figure S5**). Both two samples showed type IV adsorption–desorption isotherms with  $\text{H}_3$  hysteresis loop, indicating the formation of fissure-like pore. The Barret–Joyner–Halenda (BJH) pore size distribution curve was given in the inset of **Figure S5**. It was shown that the p-g- $\text{C}_3\text{N}_4$  sample displayed double peak size distribution, while the  $\text{FeO}_x/\text{C}_3\text{N}_4\text{-P3}$  sample formed an aperture of around 20 nm.

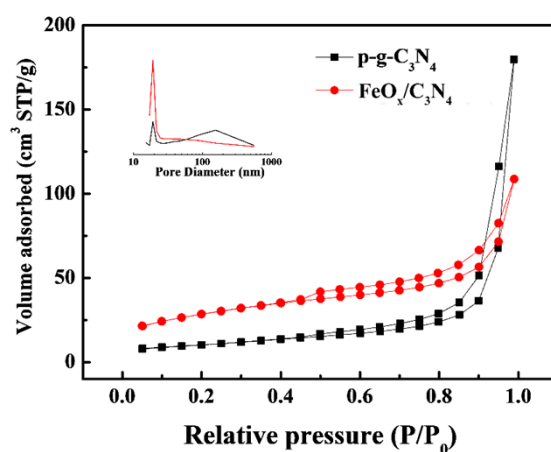

**Supplementary Figure 5.** Nitrogen adsorption–desorption isotherms and Barret–Joyner–Halenda (BJH) pore size distribution plots (inset) of p-g- $\text{C}_3\text{N}_4$  and  $\text{FeO}_x/\text{C}_3\text{N}_4\text{-P3}$  composites.

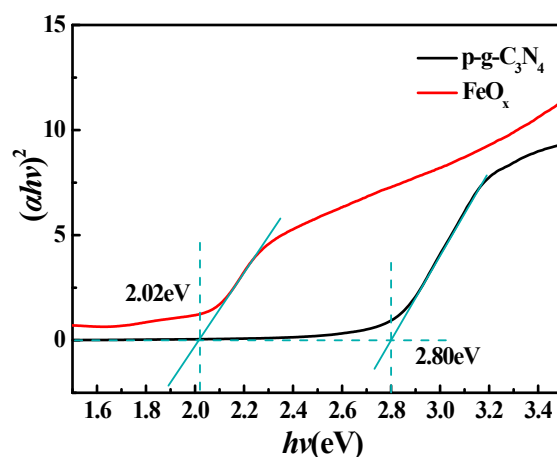

**Supplementary Figure 6.** Tauc-plot of the  $(\alpha hv)^2$  versus  $h\nu$  for p-g-C<sub>3</sub>N<sub>4</sub> and Fe<sub>2</sub>O<sub>3</sub>.

In general, the band edge positions of CB and VB of a semiconductor can be determined using Tauc-plot method. The conduction band (CB) edge of a semiconductor at zero charge can be determined using the following equation:

$$E_{CB} = \chi - E^e - 1/2E_g \quad (1)$$

$$E_{VB} = E_g + E_{CB} \quad (2)$$

Where,  $E_{CB}$  is the CB edge potential,  $E_{VB}$  is the valance band (VB) edge potential, and  $\chi$  is the electronegativity of the semiconductor, expressed as the geometric mean of the absolute electronegativity of the constituent atoms, which is defined as the arithmetic mean of the atomic electron affinity and the first ionization energy.  $E^e$  is the energy of free electrons on the hydrogen scale  $\approx 4.5$  eV and  $E_g$  is the band gap of the semiconductor. The CB and VB of Fe<sub>2</sub>O<sub>3</sub> can be calculated from the empirical formula, which are 0.36 and 2.38 eV, respectively.

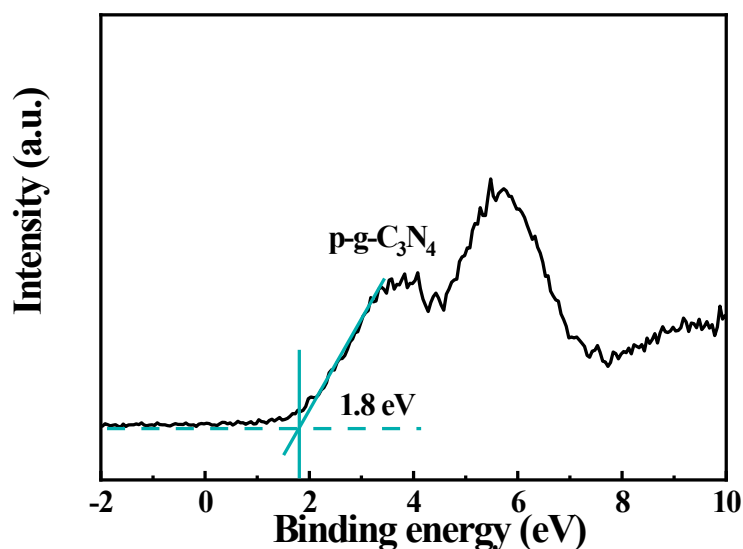

**Supplementary Figure 7.** Valence band spectra of p-g-C<sub>3</sub>N<sub>4</sub>.

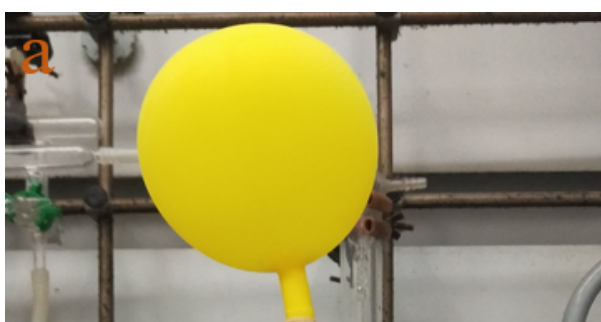

8

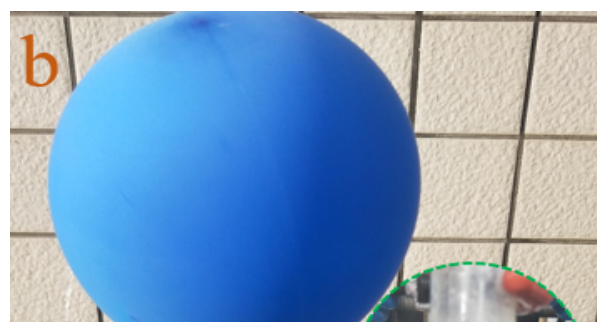



**Supplementary Figure 8.** Dispersion of p-g-C<sub>3</sub>N<sub>4</sub> (a) and FeO<sub>x</sub>/C<sub>3</sub>N<sub>4</sub>-P3 (b) composite in the reaction solution.

**Details optimization reaction conditions**

**Supplementary Table 1.** Optimization of reaction conditions<sup>a</sup>

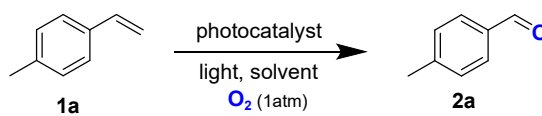

| Entry | Catalyst                                                    | Light           | solvent          | Yield(%) <sup>b</sup> |
|-------|-------------------------------------------------------------|-----------------|------------------|-----------------------|
| 1     | FeO <sub>x</sub> /C <sub>3</sub> N <sub>4</sub> -P1 (20 mg) | Xe lamp (250 W) | H <sub>2</sub> O | 48                    |
| 2     | FeO <sub>x</sub> /C <sub>3</sub> N <sub>4</sub> -P2 (20 mg) | Xe lamp (250 W) | H <sub>2</sub> O | 71                    |
| 3     | FeO <sub>x</sub> /C <sub>3</sub> N <sub>4</sub> -P3 (20 mg) | Xe lamp (250 W) | H <sub>2</sub> O | 78                    |
| 4     | FeO <sub>x</sub> /C <sub>3</sub> N <sub>4</sub> -P4 (20 mg) | Xe lamp (250 W) | H <sub>2</sub> O | 63                    |
| 5     | CoO <sub>x</sub> /C <sub>3</sub> N <sub>4</sub> -P3 (20 mg) | Xe lamp (250 W) | H <sub>2</sub> O | 44                    |
| 6     | MnO <sub>x</sub> /C <sub>3</sub> N <sub>4</sub> -P3 (20 mg) | Xe lamp (250 W) | H <sub>2</sub> O | 53                    |

|    |                                                                          |                 |                             |       |
|----|--------------------------------------------------------------------------|-----------------|-----------------------------|-------|
| 7  | p-g-C <sub>3</sub> N <sub>4</sub> (20 mg)                                | Xe lamp (250 W) | H <sub>2</sub> O            | 40    |
| 8  | Fe <sub>2</sub> O <sub>3</sub> /C <sub>3</sub> N <sub>4</sub> -H (20 mg) | Xe lamp (250 W) | H <sub>2</sub> O            | 42    |
| 9  | FeO <sub>x</sub> /C <sub>3</sub> N <sub>4</sub> -C (20 mg)               | Xe lamp (250 W) | H <sub>2</sub> O            | 57    |
| 10 | Fe <sub>2</sub> O <sub>3</sub> (20 mg)                                   | Xe lamp (250 W) | H <sub>2</sub> O            | No    |
| 11 | Ru(bpy) <sub>3</sub> Cl <sub>2</sub> (2 mol%)                            | Blue LED (5 W)  | H <sub>2</sub> O            | trace |
| 12 | Ir(ppy) <sub>3</sub> (2 mol%)                                            | Blue LED (5 W)  | H <sub>2</sub> O            | trace |
| 13 | Eosin Y (2 mol%)                                                         | Blue LED (5W)   | H <sub>2</sub> O            | trace |
| 14 | Rhodamine B (2 mol%)                                                     | Blue LED (5 W)  | H <sub>2</sub> O            | trace |
| 15 | p-g-C <sub>3</sub> N <sub>4</sub> (20 mg)                                | Xe lamp (250 W) | MeCN/H <sub>2</sub> O (1:1) | 51    |
| 16 | FeO <sub>x</sub> /C <sub>3</sub> N <sub>4</sub> -P3 (20 mg)              | Xe lamp (250 W) | MeCN/H <sub>2</sub> O (1:1) | 78    |
| 17 | FeO <sub>x</sub> /C <sub>3</sub> N <sub>4</sub> -P3 (20 mg)              | Xe lamp (250 W) | dry MeCN                    | trace |
| 18 | FeO <sub>x</sub> /C <sub>3</sub> N <sub>4</sub> -P3 (30 mg)              | Xe lamp (250 W) | H <sub>2</sub> O            | 73    |
| 19 | FeO <sub>x</sub> /C <sub>3</sub> N <sub>4</sub> -P3 (10 mg)              | Xe lamp (250 W) | H <sub>2</sub> O            | 47    |
| 20 | without catalyst                                                         | Xe lamp (250 W) | H <sub>2</sub> O            | No    |
| 21 | FeO <sub>x</sub> /C <sub>3</sub> N <sub>4</sub> -P3 (20 mg)              | without light   | H <sub>2</sub> O            | No    |
| 22 | FeO <sub>x</sub> /C <sub>3</sub> N <sub>4</sub> -P3 (20 mg)              | sunlight        | H <sub>2</sub> O            | 75    |

<sup>a</sup> Reaction conditions: 4-methylstyrene (1 mmol), solvent (2 mL), the reaction filled with oxygen (1 atm), at room temperature, irradiation for 6 h. <sup>b</sup> isolated yield.

As can be seen, 78% yield of desired oxidative cleavage product was obtained when FeO<sub>x</sub>/C<sub>3</sub>N<sub>4</sub>-P3 was used as photocatalyst after 6 h irradiation (Table S1, entries 3). Other photo-oxidation-doped CoO<sub>x</sub>/C<sub>3</sub>N<sub>4</sub>-P, MnO<sub>x</sub>/C<sub>3</sub>N<sub>4</sub>-P and porous graphite phase carbon nitride (p-g-C<sub>3</sub>N<sub>4</sub>) were also tested and gave inferior results (Table S1, entries 5-7). Moreover, lower yields of **2a** were obtained when Fe<sub>2</sub>O<sub>3</sub>-doped C<sub>3</sub>N<sub>4</sub> prepared by hydrothermal (Table S1, entry 8) or calcination (Table S1, entry 9). While no reaction was observed when Fe<sub>2</sub>O<sub>3</sub> was used directly (Table S1, entry 10). These results highlighting the critical role of the interacting model between C<sub>3</sub>N<sub>4</sub> and FeO<sub>x</sub> in controlling the activity of the photocatalyst in the aerobic cleavage. Additionally, typical homogeneous photocatalyst such as Ru(bpy)<sub>3</sub>Cl<sub>2</sub>, Ir(ppy)<sub>3</sub>, Eosin Y and Rhodamine B were also tested, however, not able to provide any significant transformation in water (Table S1, entries 11-14). Although, p-g-C<sub>3</sub>N<sub>4</sub> could disperse well in MeCN/H<sub>2</sub>O = 1: 1, lower yield was obtained when compared the result of Fe<sub>2</sub>O<sub>3</sub>/C<sub>3</sub>N<sub>4</sub>-P3 in the same condition (Table S1, entries 15, 16). This observation strongly indicates that the deposited FeO<sub>x</sub> significantly improved the dispersion and catalytic performance of the C<sub>3</sub>N<sub>4</sub>. Further study showed that water had a significant impact on the reaction, trace amount of cleavage product was observed when the reaction carried out in anhydrous MeCN (Table S1, entry 17). In addition, tuning the catalyst amount did not improve the performance (Table S1, entries 18, 19). Finally, the model reaction was carried out without light or photocatalyst. As expected, no desired product was observed respectively. (Table S1, entries 20, 21). It is worth noting that the reaction could work well under sunlight (Table S1, entry 22) which provided an opportunity for the use of inexhaustible solar energy synthesis for fine chemicals.

## Supplementary Data

The  $\text{H}_2\text{O}^{18}$  isotope experiment.

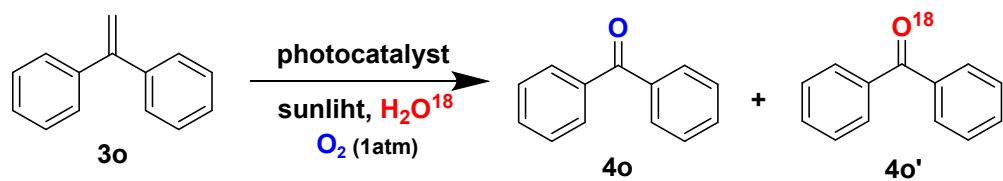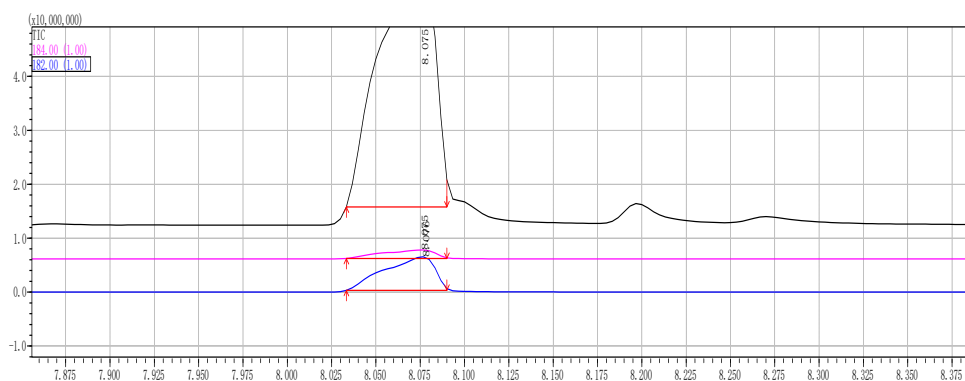

So':So=3221985: 12251171 $\approx$ 1:3.8

The  $^{18}\text{O}_2$  isotope experiment.

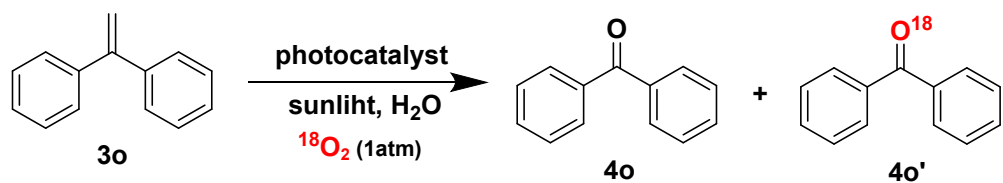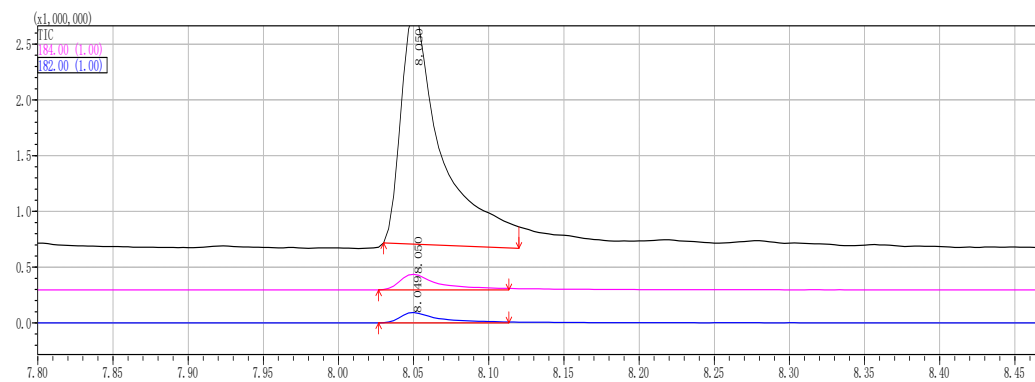

So':So=255877: 171440 $\approx$ 1:0.67

### The plausible HO• and HOO• formation process

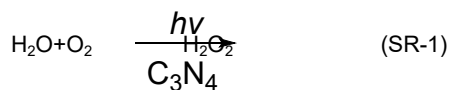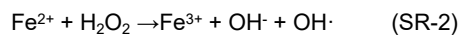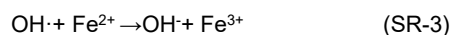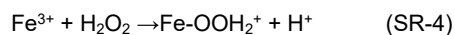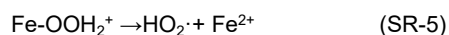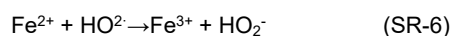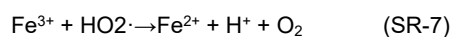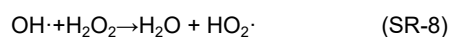

### References

- [1] Su, F. Z., Mathew, S. C., Lipner, G., Fu, X. Z., Antonietti, M., Blechert, S., Wang, X. C. *J. Am. Chem. Soc.*, **2010**, *132*, 16299.
- [2] Babasaheb, B. S., Gavade, N. L., Shinde, H., Mahajan, P., Lee, K. H., Mane, N., Deshmukh, A., Garadkar, K., Bhuse, V. *ACS Appl. Nano Mater.*, **2018**, *1*, 4682.

### NMR Spectra of Products

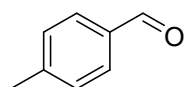

4-Methylbenzaldehyde (**2a**). Colorless liquid (90mg, 75%; 94mg, 78%<sup>b</sup>). <sup>1</sup>H NMR (400 MHz, CDCl<sub>3</sub>) δ 9.96 (s, 1H), 7.78 (d, *J* = 8.1 Hz, 2H), 7.45 – 7.23 (m, 2H), 2.44 (s, 3H). <sup>13</sup>C NMR (101 MHz, CDCl<sub>3</sub>) δ 192.0, 145.5, 134.2, 130.2, 129.8, 129.7, 129.2, 21.8. ESI-MS: *m/z* = 121 [*M*+1]<sup>+</sup>.

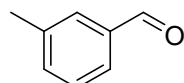

3-Methylbenzaldehyde (**2b**). Colorless liquid (101mg, 84%; 96mg, 80%<sup>b</sup>). <sup>1</sup>H NMR (400 MHz, CDCl<sub>3</sub>) δ 10.01 (s, 1H), 7.70 (dd, *J* = 6.9, 1.1 Hz, 2H), 7.56 – 7.38 (m, 2H), 2.46 (s, 3H). <sup>13</sup>C NMR (101 MHz, CDCl<sub>3</sub>) δ 192.6, 138.9, 136.5, 135.3, 130.0, 128.9, 127.2, 21.2. ESI-MS: *m/z* = 121 [*M*+1]<sup>+</sup>.

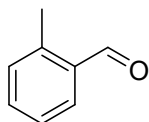

2-Methylbenzaldehyde (**2c**). Colorless liquid (68mg, 57%; 73mg, 61%<sup>b</sup>). <sup>1</sup>H NMR (400 MHz, CDCl<sub>3</sub>) δ 10.27 (s, 1H), 7.80 (dd, *J* = 7.6, 1.2 Hz, 1H), 7.48 (td, *J* = 7.5, 1.4 Hz, 1H), 7.36 (t, *J* = 7.5 Hz, 1H), 7.26 (d, *J* = 7.6 Hz, 1H), 2.67 (s, 3H). <sup>13</sup>C NMR (101 MHz, CDCl<sub>3</sub>) δ 192.8, 140.6, 134.1, 133.7, 132.1, 131.8, 126.3, 19.6. ESI-MS: *m/z* = 121 [M+1]<sup>+</sup>.

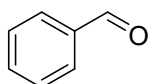

Benzaldehyde (**2d**). Colorless liquid (82mg, 77%; 78mg, 74%<sup>b</sup>). <sup>1</sup>H NMR (400 MHz, CDCl<sub>3</sub>) δ 10.02 (s, 1H), 7.88 (dd, *J* = 8.3, 1.4 Hz, 2H), 7.68 – 7.59 (m, 1H), 7.53 (dd, *J* = 10.4, 4.6 Hz, 2H). <sup>13</sup>C NMR (101 MHz, CDCl<sub>3</sub>) δ 192.4, 136.4, 134.5, 129.7, 129.0. ESI-MS: *m/z* = 107 [M+1]<sup>+</sup>.

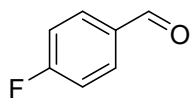

4-Fluorobenzaldehyde (**2e**). Colorless liquid (88mg, 71%; 97mg, 78%<sup>b</sup>). <sup>1</sup>H NMR (400 MHz, CDCl<sub>3</sub>) δ 9.98 (s, 1H), 7.99 – 7.85 (m, 2H), 7.22 (dd, *J* = 11.9, 5.2 Hz, 2H). <sup>13</sup>C NMR (101 MHz, CDCl<sub>3</sub>) δ 190.5, 167.8, 133.0, 133.0, 132.3, 132.2, 116.5, 116.2. ESI-MS: *m/z* = 125 [M+1]<sup>+</sup>.

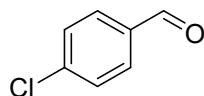

4-Chlorobenzaldehyde (**2f**). Colorless solid (112mg, 80%; 101mg, 72%<sup>b</sup>); m.p. 48°C. <sup>1</sup>H NMR (400 MHz, CDCl<sub>3</sub>) δ 10.00 (s, 1H), 7.91 – 7.79 (m, 2H), 7.58 – 7.48 (m, 2H). <sup>13</sup>C NMR (101 MHz, CD<sub>3</sub>OD) δ 197.3, 144.6, 140.1, 136.4, 134.5. ESI-MS: *m/z* = 141 [M+1]<sup>+</sup>.

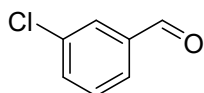

3-Chlorobenzaldehyde (**2g**). Colorless liquid (99mg, 71%; 102mg, 73%<sup>b</sup>). <sup>1</sup>H NMR (400 MHz, CDCl<sub>3</sub>) δ 9.98 (s, 1H), 7.85 (t, *J* = 1.8 Hz, 1H), 7.77 (dt, *J* = 7.6, 1.3 Hz, 1H), 7.60 (ddd, *J* = 8.0, 2.2, 1.2 Hz, 1H), 7.49 (t, *J* = 7.8 Hz, 1H). <sup>13</sup>C NMR (101 MHz, CDCl<sub>3</sub>) δ 190.8, 137.8, 135.4, 134.4, 130.4, 129.3, 128.0. ESI-MS: *m/z* = 141 [M+1]<sup>+</sup>.

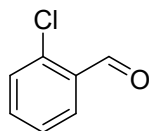

2-Chlorobenzaldehyde (**2h**). Colorless liquid (64mg, 46%; 76mg, 54%<sup>b</sup>). <sup>1</sup>H NMR (400 MHz, CDCl<sub>3</sub>) δ 10.48 (d, *J* = 0.8 Hz, 1H), 7.92 (dd, *J* = 7.7, 1.8 Hz, 1H), 7.53 (ddd, *J* = 8.1, 7.2, 1.8 Hz, 1H), 7.48 – 7.43 (m, 1H), 7.41 – 7.36 (m, 1H). <sup>13</sup>C NMR (101 MHz, CDCl<sub>3</sub>) δ 189.7, 137.9, 135.1, 132.5, 130.6, 129.4, 127.3. ESI-MS: *m/z* = 141 [M+1]<sup>+</sup>.

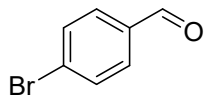

4-Bromobenzaldehyde (**2i**). Colorless solid (142mg, 77%; 125mg, 68%<sup>b</sup>); m.p. 55-58°C. <sup>1</sup>H NMR (400 MHz, CDCl<sub>3</sub>) δ 10.00 (s, 1H), 7.83 – 7.74 (m, 2H), 7.73 – 7.66 (m, 2H). <sup>13</sup>C NMR (101 MHz, CDCl<sub>3</sub>) δ 191.0, 135.1, 132.4, 131.0, 129.7. ESI-MS: m/z =185 [M+1]<sup>+</sup>.

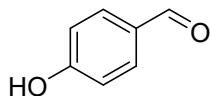

4-Hydroxybenzaldehyde (**2j**). Yellow solid (81mg, 66%; 84mg, 69%<sup>b</sup>); m.p. 112-116°C. <sup>1</sup>H NMR (400 MHz, CDCl<sub>3</sub>) δ 9.89 (s, 1H), 7.91 – 7.79 (m, 2H), 7.08 – 6.94 (m, 2H). <sup>13</sup>C NMR (101 MHz, CDCl<sub>3</sub>) δ 191.18, 161.54, 132.51, 129.92, 116.01. ESI-MS: m/z =123[M+1]<sup>+</sup>.

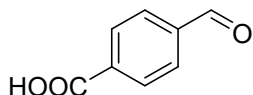

4-Formylbenzoic acid (**2k**). White solid (113mg, 75%; 105mg, 70%<sup>b</sup>); m.p. 247°C. <sup>1</sup>H NMR (400 MHz, DMSO) δ 13.39 (s, 1H), 10.09 (s, 1H), 8.19 – 8.08 (m, 2H), 8.06 – 7.95 (m, 2H). <sup>13</sup>C NMR (101 MHz, DMSO) δ 193.4, 167.0, 139.3, 136.1, 130.4, 130.0. ESI-MS: m/z =151 [M+1]<sup>+</sup>.

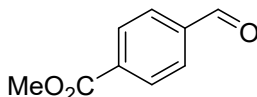

Methyl 4-formylbenzoate (**2l**). White solid (115mg, 70%; 126mg, 77%<sup>b</sup>); m.p. 59-63°C. <sup>1</sup>H NMR (400 MHz, CDCl<sub>3</sub>) δ 10.10 (s, 1H), 8.26 – 8.14 (m, 2H), 8.02 – 7.88 (m, 2H), 3.96 (s, 3H). <sup>13</sup>C NMR (101 MHz, CDCl<sub>3</sub>) δ 191.6, 166.0, 139.2, 135.1, 130.2, 129.5, 52.5. ESI-MS: m/z =165 [M+1]<sup>+</sup>.

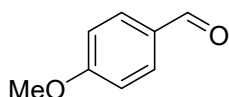

4-Methoxybenzaldehyde (**2m**). Colorless liquid (84mg, 62%; 90mg, 66%<sup>b</sup>). <sup>1</sup>H NMR (400 MHz, CDCl<sub>3</sub>) δ 9.89 (s, 1H), 7.96 – 7.76 (m, 2H), 7.12 – 6.92 (m, 2H), 3.89 (s, 3H). <sup>13</sup>C NMR (101 MHz, CDCl<sub>3</sub>) δ 190.8, 164.6, 132.0, 130.0, 114.3, 55.6. ESI-MS: m/z =137 [M+1]<sup>+</sup>.

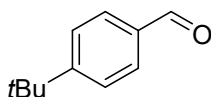

4-(Tert-butyl)benzaldehyde (**2n**). Faint yellow liquid (115mg, 71%; 109mg, 67%<sup>b</sup>). <sup>1</sup>H NMR (400 MHz, CDCl<sub>3</sub>) δ 10.01 (s, 1H), 7.84 (d, *J* = 8.4 Hz, 2H), 7.58 (d, *J* = 8.3 Hz, 2H), 1.38 (s, 9H). <sup>13</sup>C NMR (101 MHz, CDCl<sub>3</sub>) δ 192.0, 158.4, 134.1, 129.7, 126.0, 35.4, 31.1. ESI-MS: m/z =163 [M+1]<sup>+</sup>.

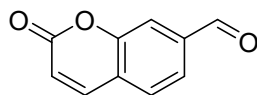

2-Oxo-2H-chromene-7-carbaldehyde (**2o**). White solid (101mg, 58%; 110mg, 63%<sup>b</sup>); m.p. 90-92°C. <sup>1</sup>H NMR (400 MHz, CDCl<sub>3</sub>) δ 10.11 (s, 1H), 7.86 – 7.73 (m, 3H), 7.68 (d, *J* = 8.3 Hz, 1H), 6.60 (d, *J* = 9.6 Hz, 1H). <sup>13</sup>C NMR (101 MHz, CDCl<sub>3</sub>) δ 190.5, 159.8, 154.2, 142.3, 138.4, 128.7, 124.5, 123.3, 119.5, 118.2. ESI-MS: m/z =175 [M+1]<sup>+</sup>.

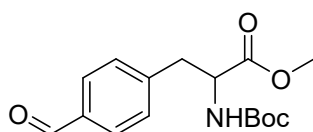

Methyl 2-((tert-butoxycarbonyl)amino)-3-(4-formylphenyl)propanoate (**2p**). White solid (212mg, 69%; 224mg, 73%<sup>b</sup>); m.p. 201-203 °C. <sup>1</sup>H NMR (400 MHz, MeOD)  $\delta$  9.97 (s, 1H), 7.86 (d,  $J$  = 8.0 Hz, 2H), 7.46 (d,  $J$  = 8.0 Hz, 2H), 7.22 (d,  $J$  = 7.9 Hz, 1H), 4.44 (dd,  $J$  = 9.4, 5.4 Hz, 1H), 3.73 (s, 3H), 3.25 (dd,  $J$  = 13.8, 5.3 Hz, 1H), 3.02 (dd,  $J$  = 13.7, 9.5 Hz, 1H), 1.38 (s, 9H). <sup>13</sup>C NMR (101 MHz, MeOD)  $\delta$  192.4, 172.4, 156.4, 144.7, 135.3, 129.8, 129.4, 79.3, 54.7, 51.3, 37.4, 27.2. ESI-MS:  $m/z$  = 308 [M+1]<sup>+</sup>.

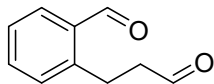

2-(3-Oxopropyl)benzaldehyde (**2q**). Yellow liquid (79mg, 49%). <sup>1</sup>H NMR (400 MHz, CDCl<sub>3</sub>)  $\delta$  10.19 (s, 1H), 9.85 (s, 1H), 7.83 (dd,  $J$  = 7.6, 1.3 Hz, 1H), 7.55 (td,  $J$  = 7.4, 1.4 Hz, 1H), 7.50 – 7.43 (m, 1H), 7.35 (d,  $J$  = 7.4 Hz, 1H), 3.38 (t,  $J$  = 7.5 Hz, 2H), 2.82 (td,  $J$  = 7.5, 1.2 Hz, 2H). <sup>13</sup>C NMR (101 MHz, CDCl<sub>3</sub>)  $\delta$  195.7, 189.1, 140.4, 130.6, 130.2, 129.9, 127.4, 126.5, 125.0, 123.6, 123.0, 41.1, 27.9, 23.8. ESI-MS:  $m/z$  = 163 [M+1]<sup>+</sup>.

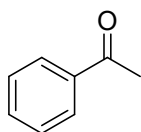

Acetophenone (**4a**). Colorless liquid (101mg, 84%). <sup>1</sup>H NMR (400 MHz, CDCl<sub>3</sub>)  $\delta$  8.07 – 7.88 (m, 2H), 7.62 – 7.54 (m, 1H), 7.52 – 7.45 (m, 2H), 2.62 (s, 3H). <sup>13</sup>C NMR (126 MHz, CDCl<sub>3</sub>)  $\delta$  197.1, 136.0, 132.0, 130.0, 128.4, 26.6. ESI-MS:  $m/z$  = 121 [M+1]<sup>+</sup>.

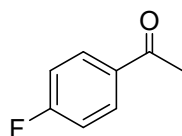

1-(4-Fluorophenyl)ethan-1-one (**4b**). Colorless liquid (115mg, 83%). <sup>1</sup>H NMR (400 MHz, CDCl<sub>3</sub>)  $\delta$  8.10 – 7.83 (m, 2H), 7.09 (t,  $J$  = 8.6 Hz, 2H), 2.55 (s, 3H). <sup>13</sup>C NMR (101 MHz, CDCl<sub>3</sub>)  $\delta$  196.4, 167.0, 164.5, 133.6, 133.6, 131.0, 130.9, 115.7, 115.5, 26.5. ESI-MS:  $m/z$  = 139 [M+1]<sup>+</sup>.

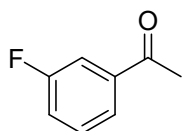

1-(3-Fluorophenyl)ethan-1-one (**4c**). Colorless liquid (112mg, 81%). <sup>1</sup>H NMR (400 MHz, CDCl<sub>3</sub>)  $\delta$  7.76 – 7.68 (m, 1H), 7.62 (ddd,  $J$  = 9.5, 2.4, 1.6 Hz, 1H), 7.43 (td,  $J$  = 8.0, 5.5 Hz, 1H), 7.30 – 7.20 (m, 1H), 2.59 (s, 3H). <sup>13</sup>C NMR (101 MHz, CDCl<sub>3</sub>)  $\delta$  196.7, 196.6, 164.1, 161.6, 139.2, 139.2, 130.3, 130.2, 124.1, 124.1, 120.2, 119.9, 115.0, 114.8, 26.6. ESI-MS:  $m/z$  = 139 [M+1]<sup>+</sup>.

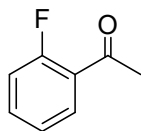

1-(2-Fluorophenyl)ethan-1-one (**4d**). Colorless liquid (55mg, 40%). <sup>1</sup>H NMR (400 MHz, CDCl<sub>3</sub>)  $\delta$  7.86 (td,  $J$  = 7.7, 1.9 Hz, 1H), 7.51 (dddd,  $J$  = 8.3, 7.1, 5.0, 1.9 Hz, 1H), 7.24 – 7.17 (m, 1H), 7.12 (ddd,  $J$  = 11.2, 8.3, 0.8 Hz, 1H), 2.63 (d,  $J$  = 4.9 Hz, 3H). <sup>13</sup>C NMR (101 MHz, CDCl<sub>3</sub>)  $\delta$  195.8, 195.8, 163.5, 160.9, 134.7, 134.6, 130.6, 130.5, 125.8, 125.7, 124.4, 124.3, 116.7, 116.5, 31.4, 31.3. ESI-MS:  $m/z$  = 139 [M+1]<sup>+</sup>.

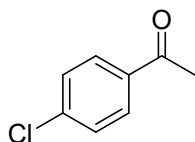

1-(4-Chlorophenyl)ethan-1-one (**4e**). Colorless liquid (126mg, 82%).  $^1\text{H}$  NMR (400 MHz,  $\text{CDCl}_3$ )  $\delta$  8.04 – 7.82 (m, 2H), 7.58 – 7.36 (m, 2H), 2.62 (s, 3H).  $^{13}\text{C}$  NMR (101 MHz,  $\text{CDCl}_3$ )  $\delta$  196.8, 139.6, 135.5, 129.7, 128.9, 26.5. ESI-MS:  $m/z$  =155  $[\text{M}+1]^+$ .

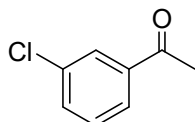

1-(3-Chlorophenyl)ethan-1-one (**4f**). Faint yellow liquid (120mg, 78%).  $^1\text{H}$  NMR (400 MHz,  $\text{CDCl}_3$ )  $\delta$  7.92 (t,  $J$  = 1.8 Hz, 1H), 7.86 – 7.78 (m, 1H), 7.53 (ddd,  $J$  = 8.0, 2.1, 1.1 Hz, 1H), 7.40 (t,  $J$  = 7.9 Hz, 1H), 2.59 (s, 3H).  $^{13}\text{C}$  NMR (101 MHz,  $\text{CDCl}_3$ )  $\delta$  196.6, 138.6, 134.9, 133.0, 129.9, 128.4, 126.4, 26.6. ESI-MS:  $m/z$  =155  $[\text{M}+1]^+$ .

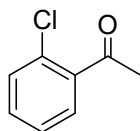

1-(2-Chlorophenyl)ethan-1-one (**4g**). Colorless liquid (71mg, 46%).  $^1\text{H}$  NMR (400 MHz,  $\text{CDCl}_3$ )  $\delta$  7.58 – 7.51 (m, 1H), 7.46 – 7.35 (m, 2H), 7.32 (ddd,  $J$  = 7.5, 6.9, 1.8 Hz, 1H), 2.65 (s, 3H).  $^{13}\text{C}$  NMR (101 MHz,  $\text{CDCl}_3$ )  $\delta$  200.4, 139.2, 132.0, 131.3, 130.6, 129.4, 126.9, 30.7. ESI-MS:  $m/z$  =155  $[\text{M}+1]^+$ .

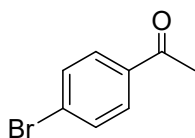

1-(4-Bromophenyl)ethan-1-one (**4h**). Colorless solid (135mg, 68%); m.p. 108-110°C.  $^1\text{H}$  NMR (400 MHz,  $\text{CDCl}_3$ )  $\delta$  7.95 – 7.72 (m, 2H), 7.70 – 7.51 (m, 2H), 2.59 (s, 3H).  $^{13}\text{C}$  NMR (101 MHz,  $\text{CDCl}_3$ )  $\delta$  197.0, 135.8, 131.9, 129.8, 128.3, 26.5. ESI-MS:  $m/z$  =199  $[\text{M}+1]^+$ .

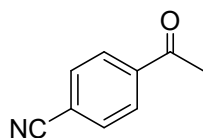

4-Acetylbenzonitrile (**4i**). Faint yellow crystalline powder (119mg, 82%); m.p. 56-59°C.  $^1\text{H}$  NMR (400 MHz,  $\text{CDCl}_3$ )  $\delta$  8.14 – 7.89 (m, 2H), 7.76 (d,  $J$  = 8.5 Hz, 2H), 2.63 (s, 3H).  $^{13}\text{C}$  NMR (101 MHz,  $\text{CDCl}_3$ )  $\delta$  196.5, 139.9, 132.5, 128.7, 117.9, 116.4, 26.7. ESI-MS:  $m/z$  =146  $[\text{M}+1]^+$ .

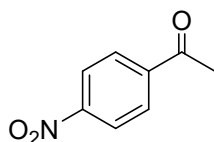

1-(4-Nitrophenyl)ethan-1-on (**4j**). Light yellow crystal (142mg, 86%); m.p. 75-78°C.  $^1\text{H}$  NMR (400 MHz,  $\text{CDCl}_3$ )  $\delta$  8.30 (d,  $J$  = 8.9 Hz, 2H), 8.19 – 8.01 (m, 2H), 2.68 (s, 3H).  $^{13}\text{C}$  NMR (101 MHz,  $\text{CDCl}_3$ )  $\delta$  196.3, 150.4, 141.4, 129.3, 123.8, 26.9. ESI-MS:  $m/z$  =166  $[\text{M}+1]^+$ .



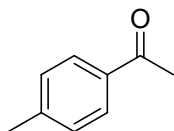

1-(*p*-tolyl)ethan-1-one (**4k**). Colorless liquid (115g, 86%).  $^1\text{H}$  NMR (400 MHz,  $\text{CDCl}_3$ )  $\delta$  7.88 (d,  $J$  = 8.2 Hz, 2H), 7.36 – 7.22 (m, 2H), 2.61 (s, 3H), 2.44 (s, 3H).  $^{13}\text{C}$  NMR (101 MHz,  $\text{CDCl}_3$ )  $\delta$  197.8, 143.9, 134.8, 129.2, 128.4, 26.5, 21.6. ESI-MS:  $m/z$  = 135  $[\text{M}+1]^+$ .

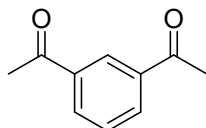

1,1'-(1,3-Phenylene)bis(ethan-1-one) (**4l**). Yellow liquid (115mg, 71%).  $^1\text{H}$  NMR (400 MHz,  $\text{CDCl}_3$ )  $\delta$  8.53 (t,  $J$  = 1.6 Hz, 1H), 8.16 (dd,  $J$  = 7.8, 1.7 Hz, 2H), 7.59 (t,  $J$  = 7.7 Hz, 1H), 2.67 (s, 6H).  $^{13}\text{C}$  NMR (101 MHz,  $\text{CDCl}_3$ )  $\delta$  197.3, 137.4, 132.5, 129.0, 128.0, 26.7. ESI-MS:  $m/z$  = 163  $[\text{M}+1]^+$ .

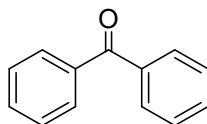

Benzophenone (**4m**). White solid (166mg, 91%); m.p. 47-51°C.  $^1\text{H}$  NMR (400 MHz,  $\text{CDCl}_3$ )  $\delta$  7.84 (ddd,  $J$  = 7.3, 2.9, 1.6 Hz, 4H), 7.67 – 7.58 (m, 2H), 7.51 (tt,  $J$  = 6.7, 1.2 Hz, 4H).  $^{13}\text{C}$  NMR (101 MHz,  $\text{CDCl}_3$ )  $\delta$  196.8, 137.6, 132.4, 130.1, 128.3. ESI-MS:  $m/z$  = 183  $[\text{M}+1]^+$ .

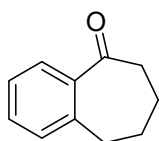

6,7,8,9-Tetrahydro-5H-benzo[7]annulen-5-one (**4n**). Colorless liquid (61mg, 39%).  $^1\text{H}$  NMR (400 MHz,  $\text{CDCl}_3$ )  $\delta$  7.72 (dd,  $J$  = 7.7, 1.2 Hz, 1H), 7.40 (td,  $J$  = 7.5, 1.4 Hz, 1H), 7.33 – 7.24 (m, 1H), 7.19 (d,  $J$  = 7.5 Hz, 1H), 3.00 – 2.82 (m, 2H), 2.81 – 2.63 (m, 2H), 1.98 – 1.67 (m, 4H).  $^{13}\text{C}$  NMR (101 MHz,  $\text{CDCl}_3$ )  $\delta$  206.1, 141.3, 138.8, 132.2, 129.7, 128.5, 126.6, 40.8, 32.5, 25.2, 20.9. ESI-MS:  $m/z$  = 161  $[\text{M}+1]^+$ .

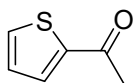

1-(Thiophen-2-yl)ethan-1-one (**4o**). Yellow liquid (111mg, 88%).  $^1\text{H}$  NMR (400 MHz,  $\text{CDCl}_3$ )  $\delta$  7.65 (ddd,  $J$  = 6.0, 4.4, 1.0 Hz, 2H), 7.11 (dd,  $J$  = 4.9, 3.8 Hz, 1H), 2.54 (s, 3H).  $^{13}\text{C}$  NMR (101 MHz,  $\text{CDCl}_3$ )  $\delta$  190.7, 144.5, 133.8, 132.5, 128.2, 26.9. ESI-MS:  $m/z$  = 127  $[\text{M}+1]^+$ .

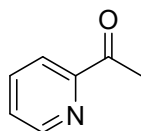

1-(Pyridin-2-yl)ethan-1-one (**4p**). Colorless liquid (68mg, 56%).  $^1\text{H}$  NMR (400 MHz,  $\text{CDCl}_3$ )  $\delta$  8.61 (ddd,  $J$  = 4.7, 1.5, 0.8 Hz, 1H), 8.02 – 7.90 (m, 1H), 7.76 (td,  $J$  = 7.7, 1.7 Hz, 1H), 7.40 (ddd,  $J$  = 7.5, 4.8, 1.2 Hz, 1H), 2.65 (s, 3H).  $^{13}\text{C}$  NMR (101 MHz,  $\text{CDCl}_3$ )  $\delta$  196.7, 196.6, 164.1, 161.6, 139.2, 139.2, 130.3, 130.2, 124.1, 124.1, 120.2, 119.9, 115.0, 114.8, 26.6. ESI-MS:  $m/z$  = 122  $[\text{M}+1]^+$ .

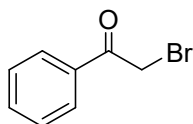

2-Bromo-1-phenylethan-1-one (**4q**). Colorless solid (127mg, 64%); m.p. 48-51°C. <sup>1</sup>H NMR (400 MHz, CDCl<sub>3</sub>) δ 8.06 – 7.97 (m, 2H), 7.68 – 7.57 (m, 1H), 7.51 (td, *J* = 7.9, 3.9 Hz, 2H), 4.48 (s, 2H). <sup>13</sup>C NMR (101 MHz, CDCl<sub>3</sub>) δ 191.3, 134.0, 130.4, 129.2, 128.9, 128.9, 31.0. ESI-MS: *m/z* = 199 [M+1]<sup>+</sup>.

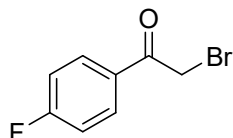

2-Bromo-1-(4-fluorophenyl)ethan-1-one (**4r**). White powder (177mg, 82%); m.p. 47-49°C. <sup>1</sup>H NMR (400 MHz, CDCl<sub>3</sub>) δ 8.14 – 7.92 (m, 2H), 7.23 – 7.10 (m, 2H), 4.43 (s, 2H). <sup>13</sup>C NMR (101 MHz, CDCl<sub>3</sub>) δ 189.9, 167.4, 164.9, 131.8, 131.7, 130.4, 130.3, 116.2, 116.0, 30.5. ESI-MS: *m/z* = 217 [M+1]<sup>+</sup>.

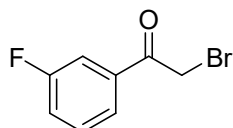

2-Bromo-1-(3-fluorophenyl)ethan-1-one (**4s**). White solid (166mg, 77%); m.p. 34-35°C. <sup>1</sup>H NMR (400 MHz, CDCl<sub>3</sub>) δ 7.79 (ddd, *J* = 7.8, 1.5, 1.0 Hz, 1H), 7.69 (ddd, *J* = 9.3, 2.5, 1.7 Hz, 1H), 7.51 (td, *J* = 8.0, 5.5 Hz, 1H), 7.33 (tdd, *J* = 8.2, 2.6, 0.9 Hz, 1H), 4.44 (s, 2H). <sup>13</sup>C NMR (101 MHz, CDCl<sub>3</sub>) δ 190.2, 190.1, 164.1, 161.6, 136.0, 135.9, 130.6, 130.6, 124.8, 124.7, 115.8, 115.6, 30.5. ESI-MS: *m/z* = 217 [M+1]<sup>+</sup>.

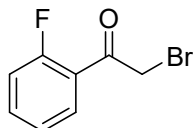

2-Bromo-1-(2-fluorophenyl)ethan-1-one (**4t**). Yellow liquid (153mg, 71%). <sup>1</sup>H NMR (400 MHz, CDCl<sub>3</sub>) δ 7.93 (td, *J* = 7.6, 1.9 Hz, 1H), 7.59 (dddd, *J* = 8.3, 7.2, 5.1, 1.9 Hz, 1H), 7.28 (ddd, *J* = 8.4, 7.0, 1.1 Hz, 1H), 7.18 (ddd, *J* = 11.3, 8.3, 0.9 Hz, 1H), 4.53 (d, *J* = 2.4 Hz, 2H). <sup>13</sup>C NMR (101 MHz, CDCl<sub>3</sub>) δ 189.1, 189.1, 163.0, 160.4, 135.7, 135.6, 131.5, 131.5, 124.9, 124.9, 116.8, 116.6, 36.1, 36.0. ESI-MS: *m/z* = 217 [M+1]<sup>+</sup>.

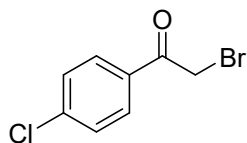

2-Bromo-1-(4-chlorophenyl)ethan-1-one (**4u**). White solid (195mg, 84%); m.p. 93-96°C. <sup>1</sup>H NMR (400 MHz, CDCl<sub>3</sub>) δ 8.03 – 7.88 (m, 2H), 7.57 – 7.42 (m, 2H), 4.43 (s, 2H). <sup>13</sup>C NMR (101 MHz, CDCl<sub>3</sub>) δ 190.2, 140.5, 132.3, 130.4, 129.2, 30.4. ESI-MS: *m/z* = 233 [M+1]<sup>+</sup>.

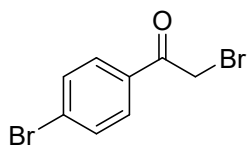

2-Bromo-1-(4-bromophenyl)ethan-1-one (**4v**). Colorless solid (226mg, 82%); m.p. 108-110°C. <sup>1</sup>H NMR (400 MHz, CDCl<sub>3</sub>) δ 7.90 – 7.78 (m, 2H), 7.69 – 7.55 (m, 2H), 4.42 (s, 2H). <sup>13</sup>C NMR (101 MHz, CDCl<sub>3</sub>) δ 190.4, 132.7, 132.2, 130.4, 129.3, 30.5. ESI-MS: *m/z* = 277 [M+1]<sup>+</sup>.

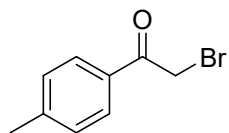

2-Bromo-1-(p-tolyl)ethan-1-one (**4w**). White solid (182mg, 86%); m.p. 46-48°C. <sup>1</sup>H NMR (400 MHz, CDCl<sub>3</sub>) δ 7.90 (d, *J* = 8.3 Hz, 2H), 7.30 (dd, *J* = 11.0, 3.0 Hz, 2H), 4.45 (s, 2H), 2.45 (s, 3H). <sup>13</sup>C NMR (101 MHz, CDCl<sub>3</sub>) δ 191.0, 145.1, 131.5, 129.6, 129.1, 31.0, 21.8. ESI-MS: *m/z* = 213 [M+1]<sup>+</sup>.

<sup>b</sup> irradiated under 250W Xe lamp.

## NMR Spectra

## Compound 2a

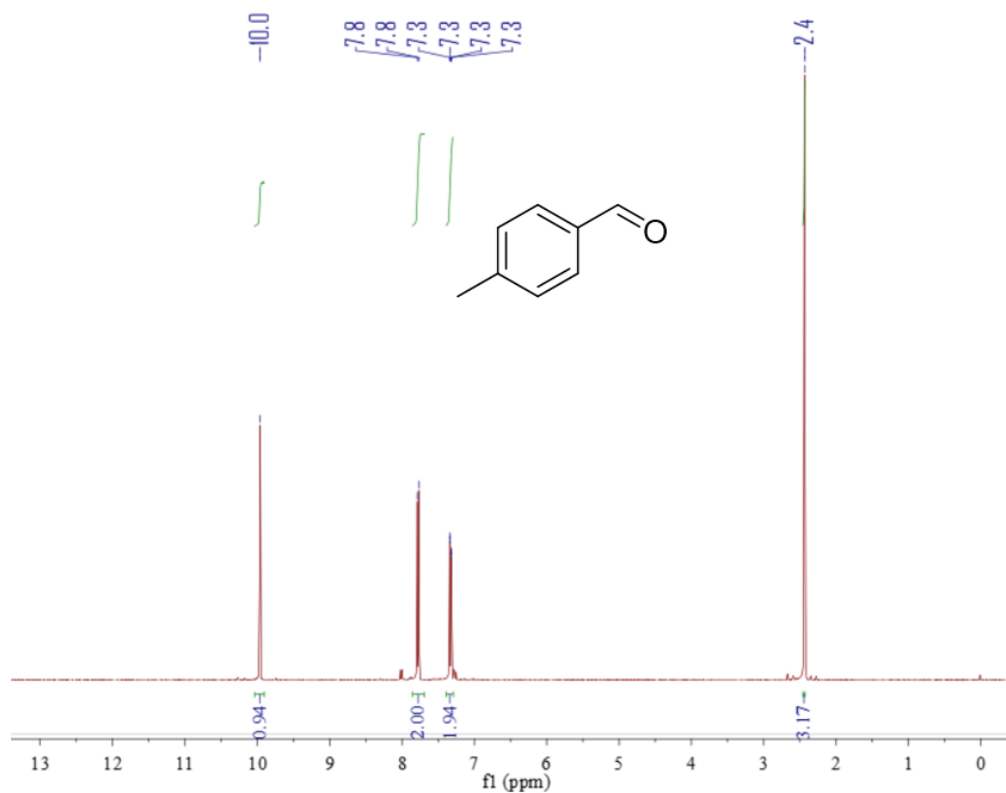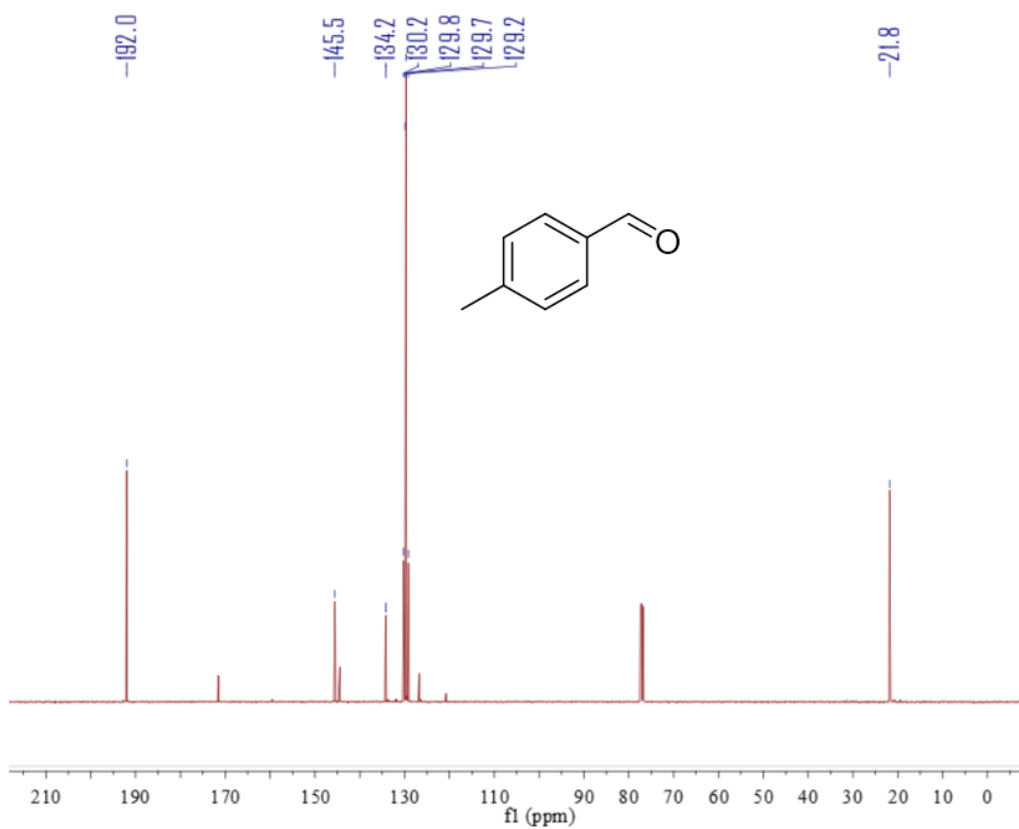

Compound 2b

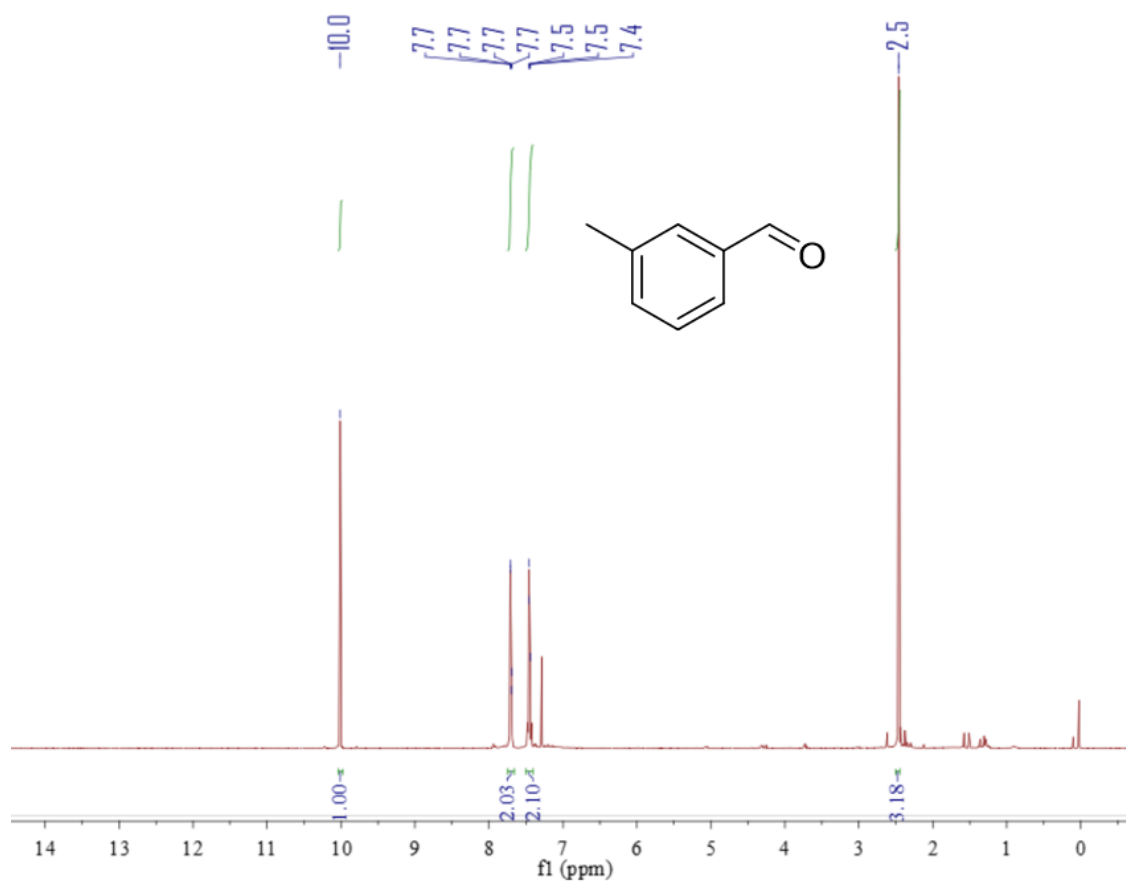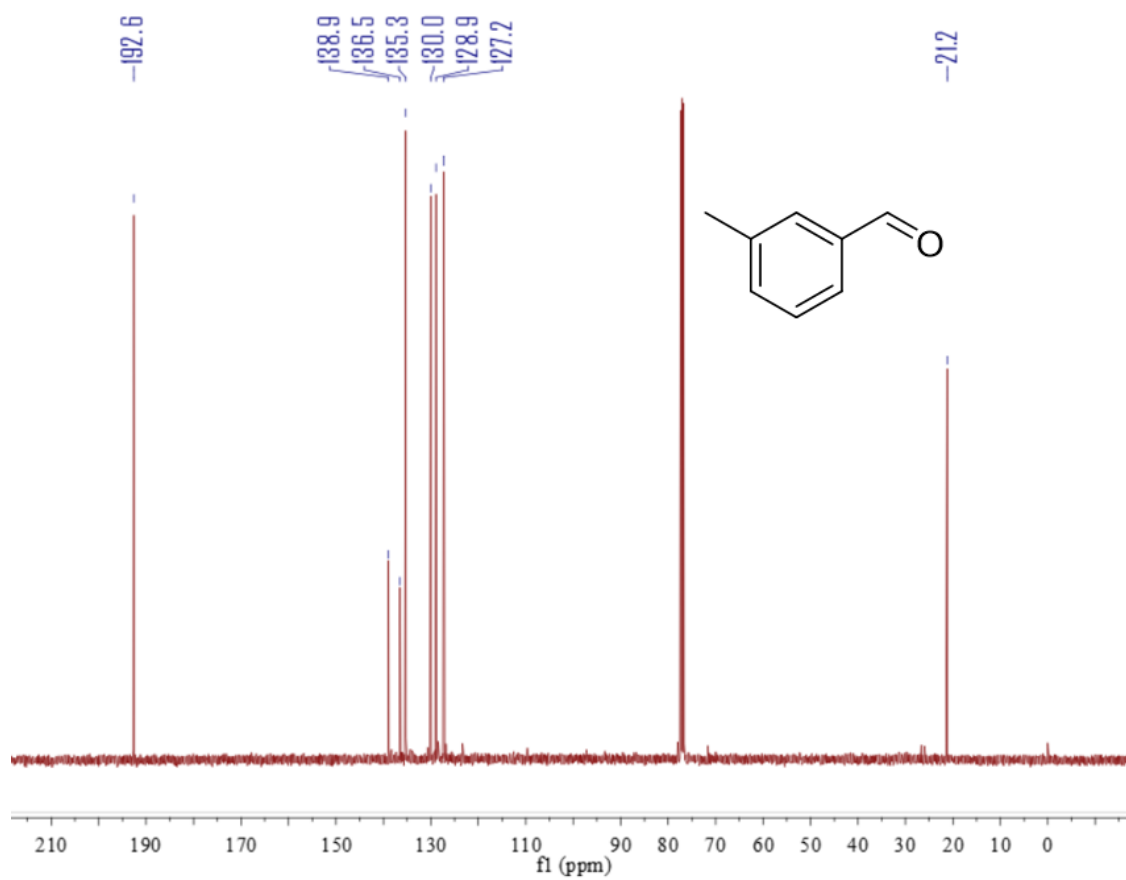

Compound 2c

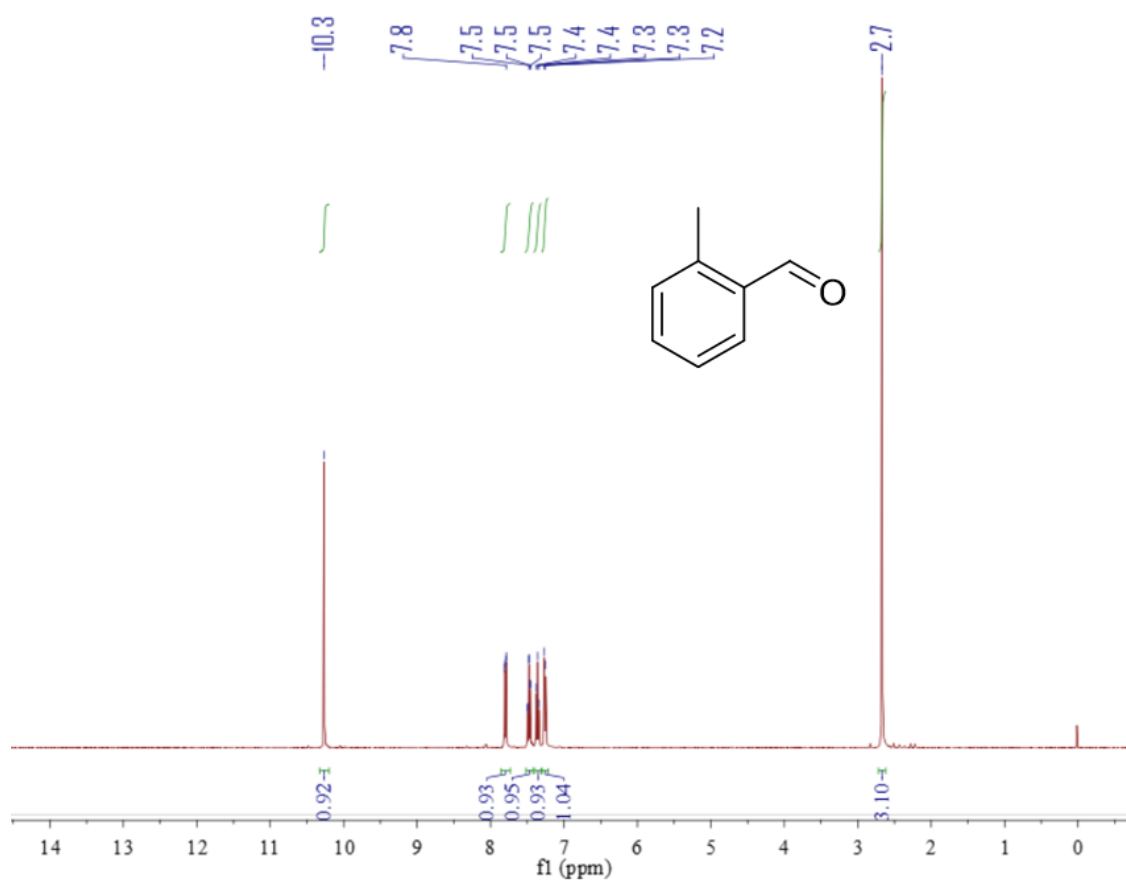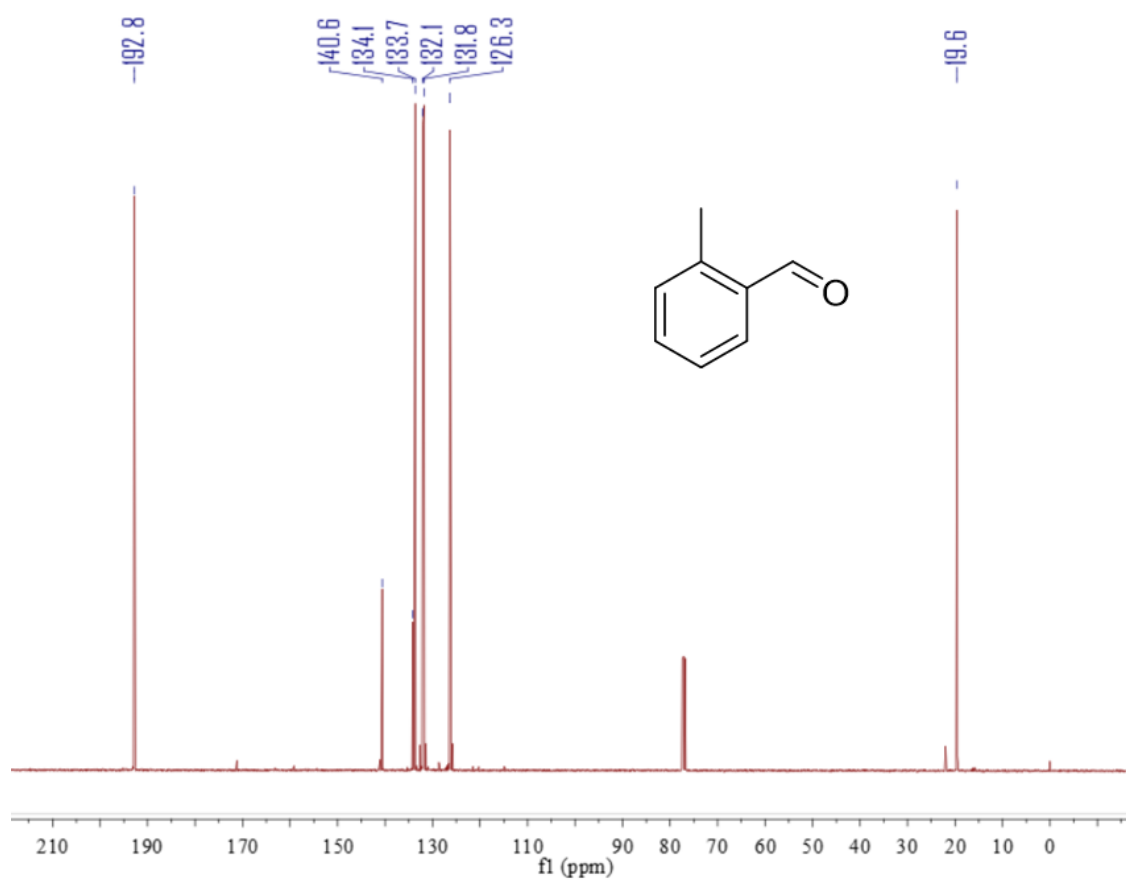

Compound 2d

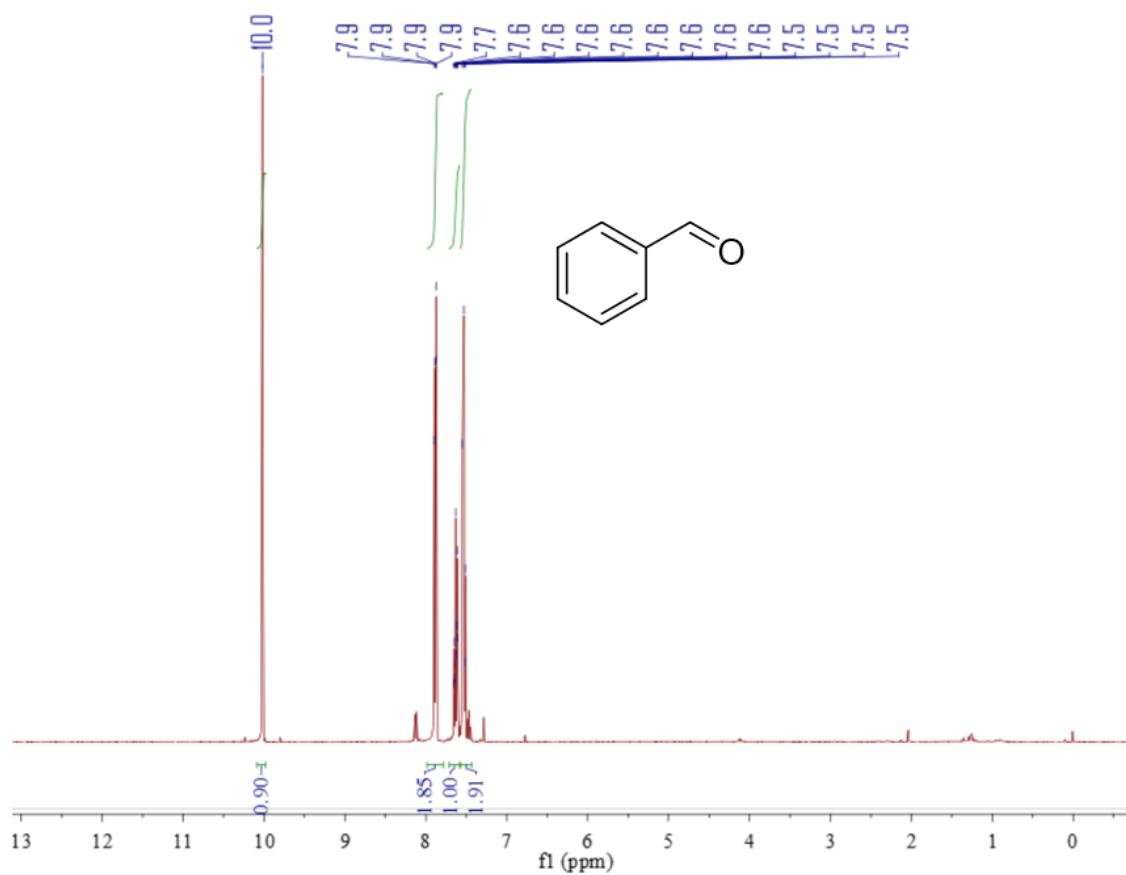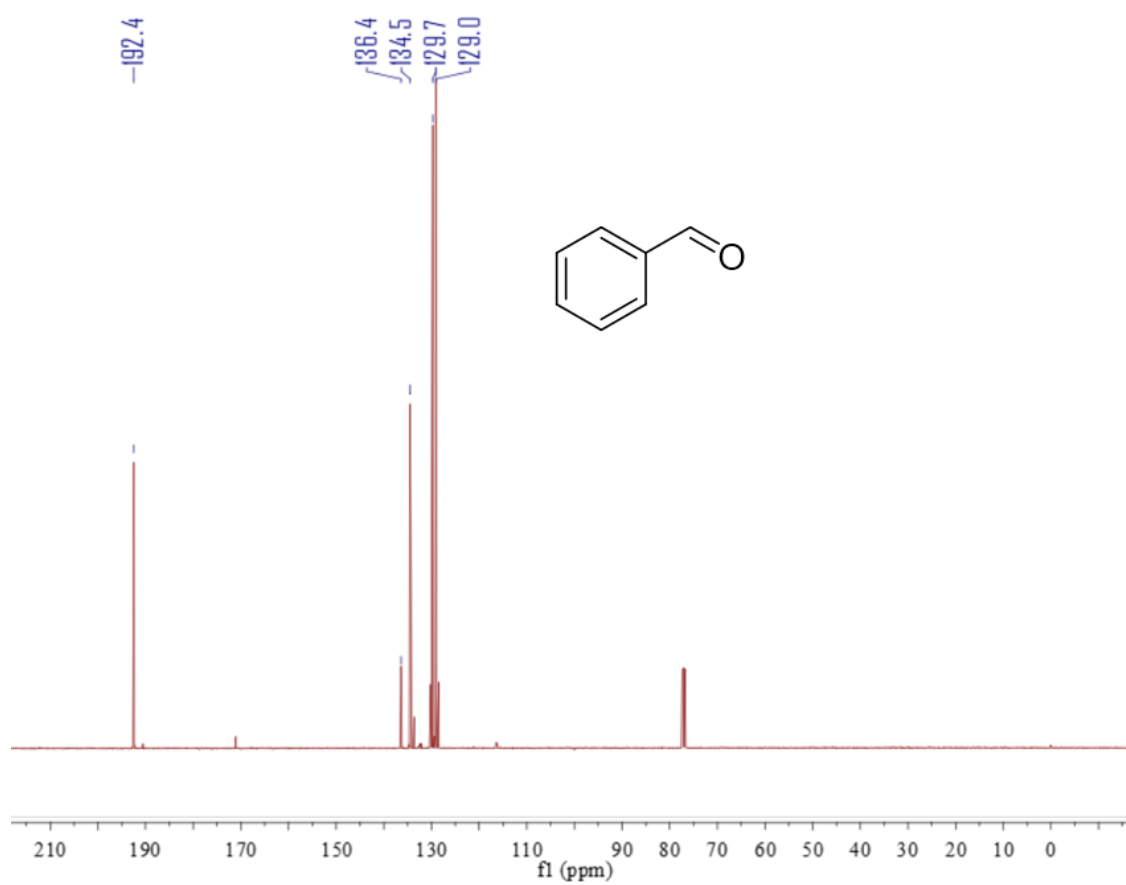

Compound 2e

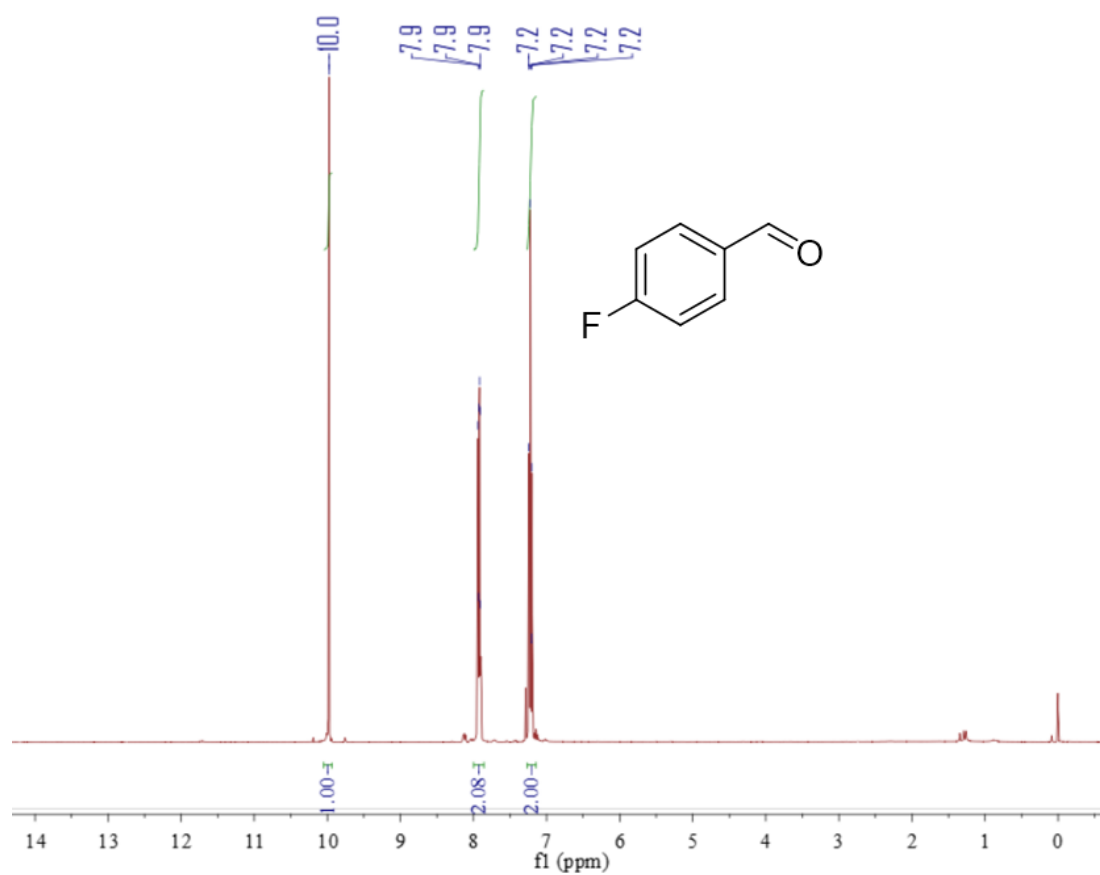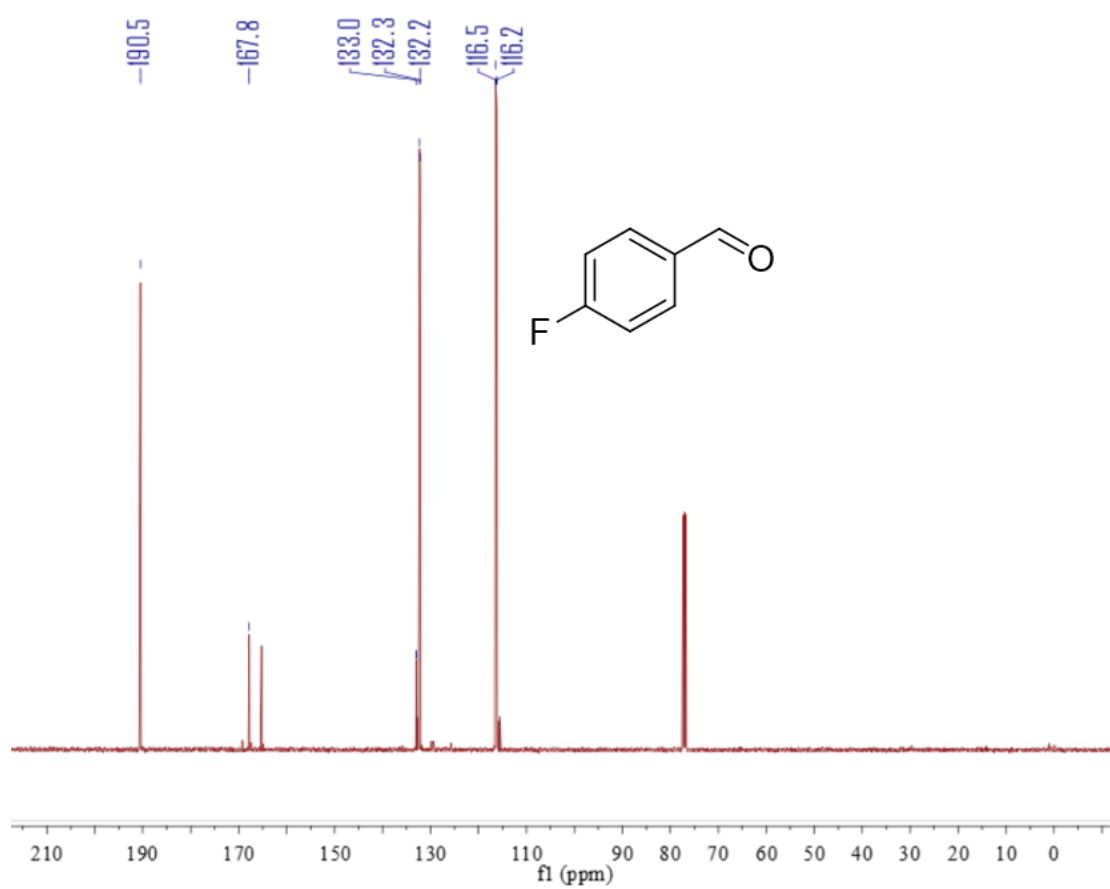

Compound 2f



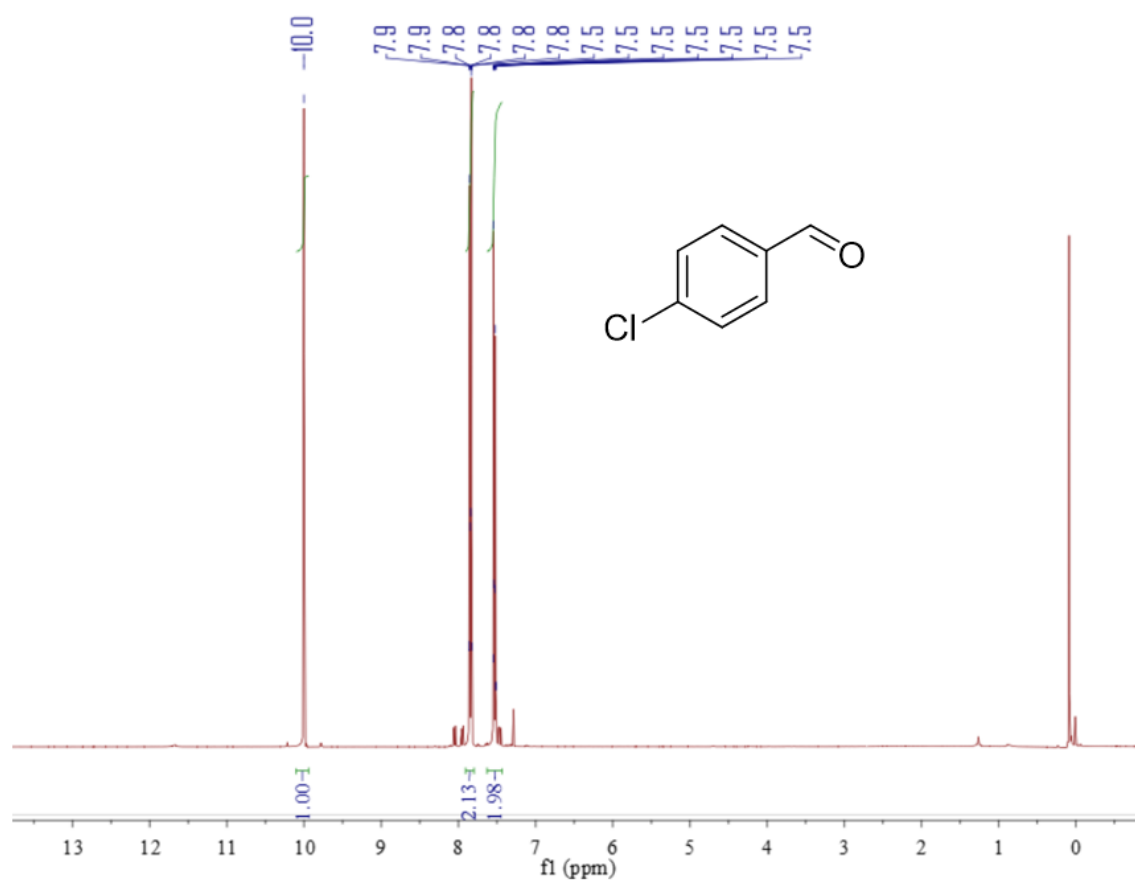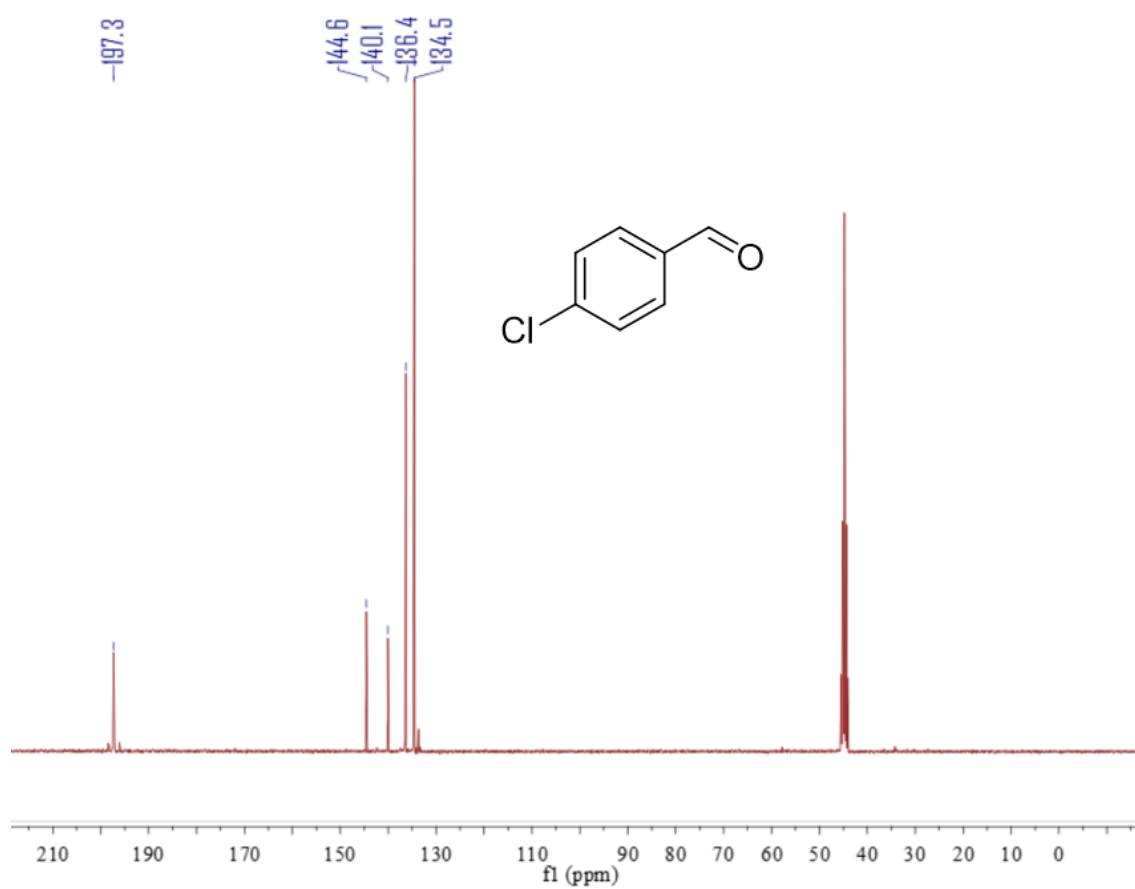

Compound 2g

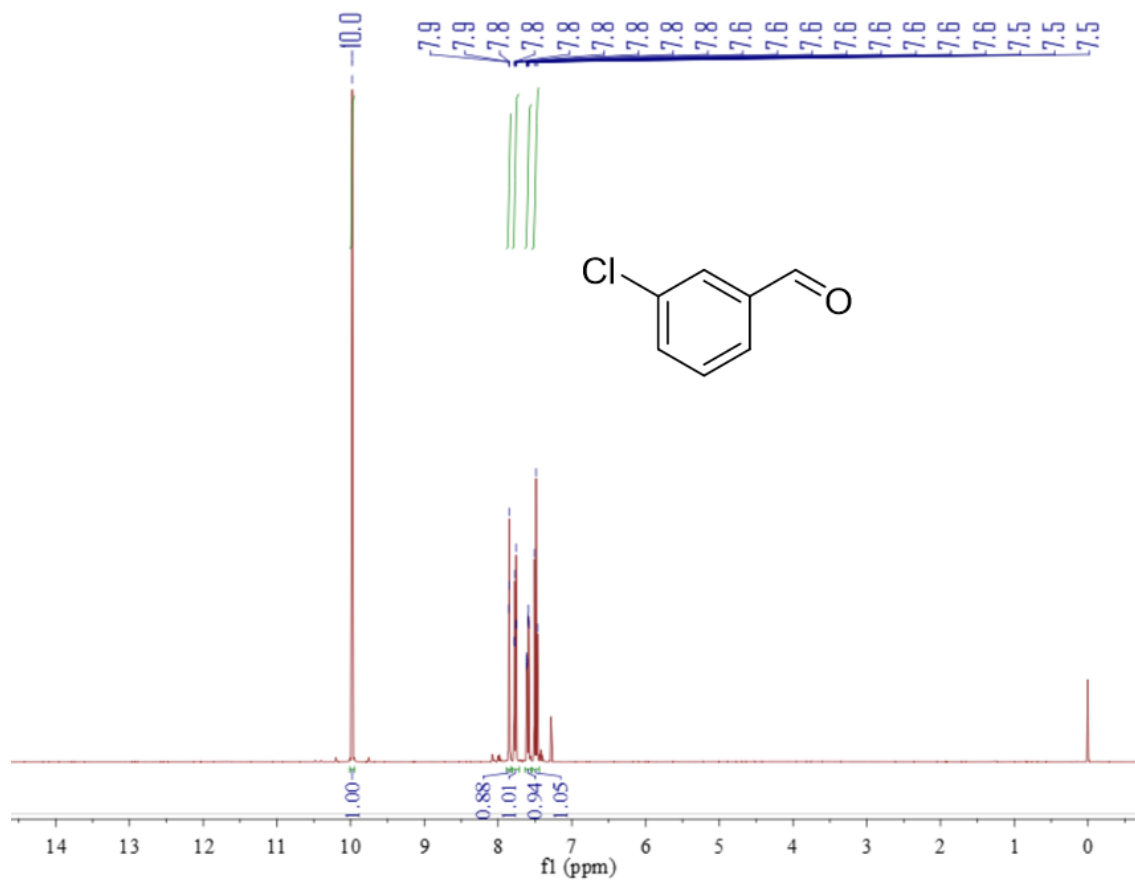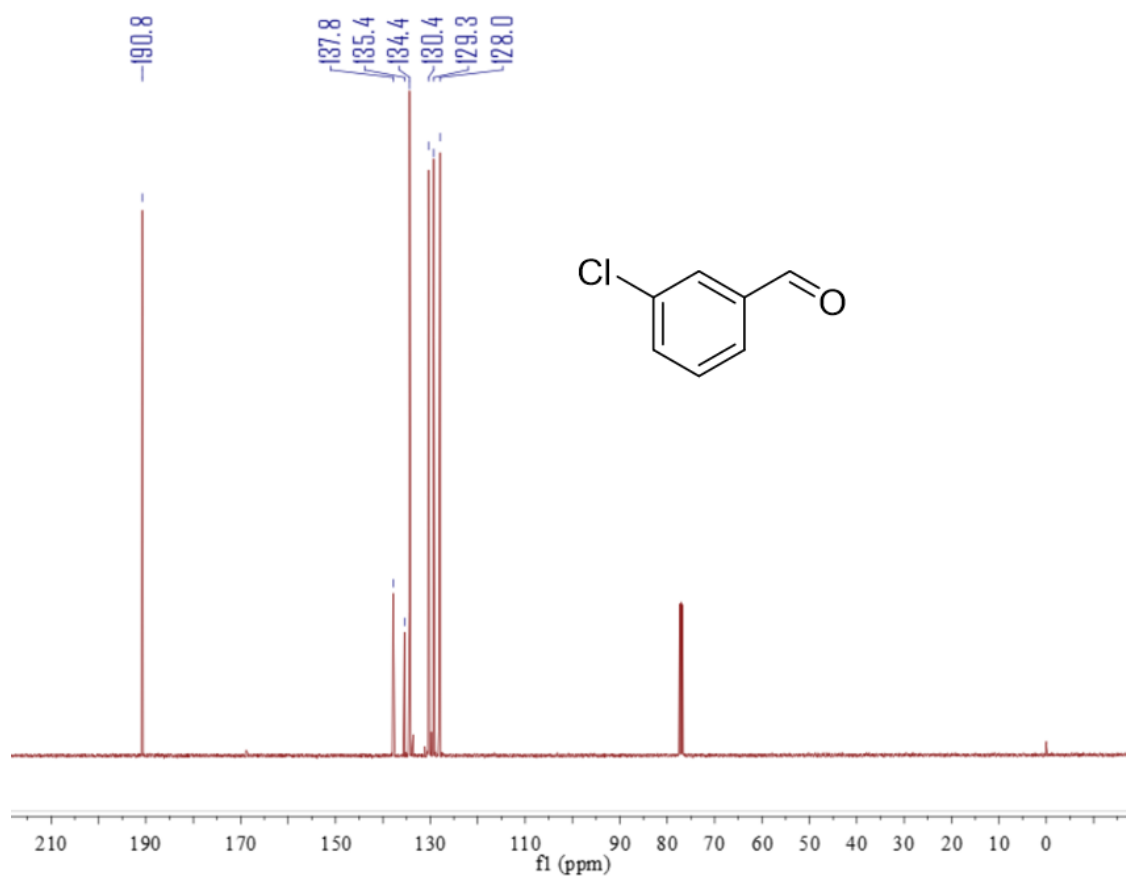

Compound 2h

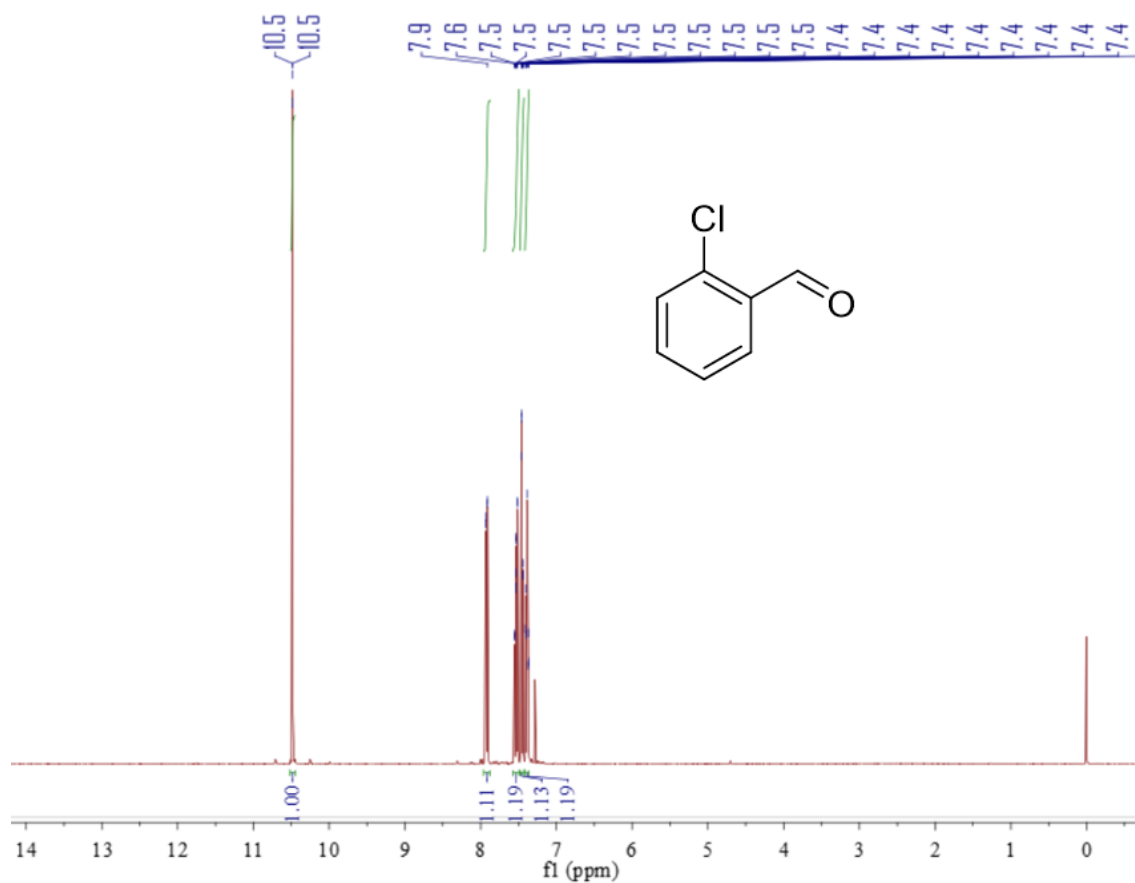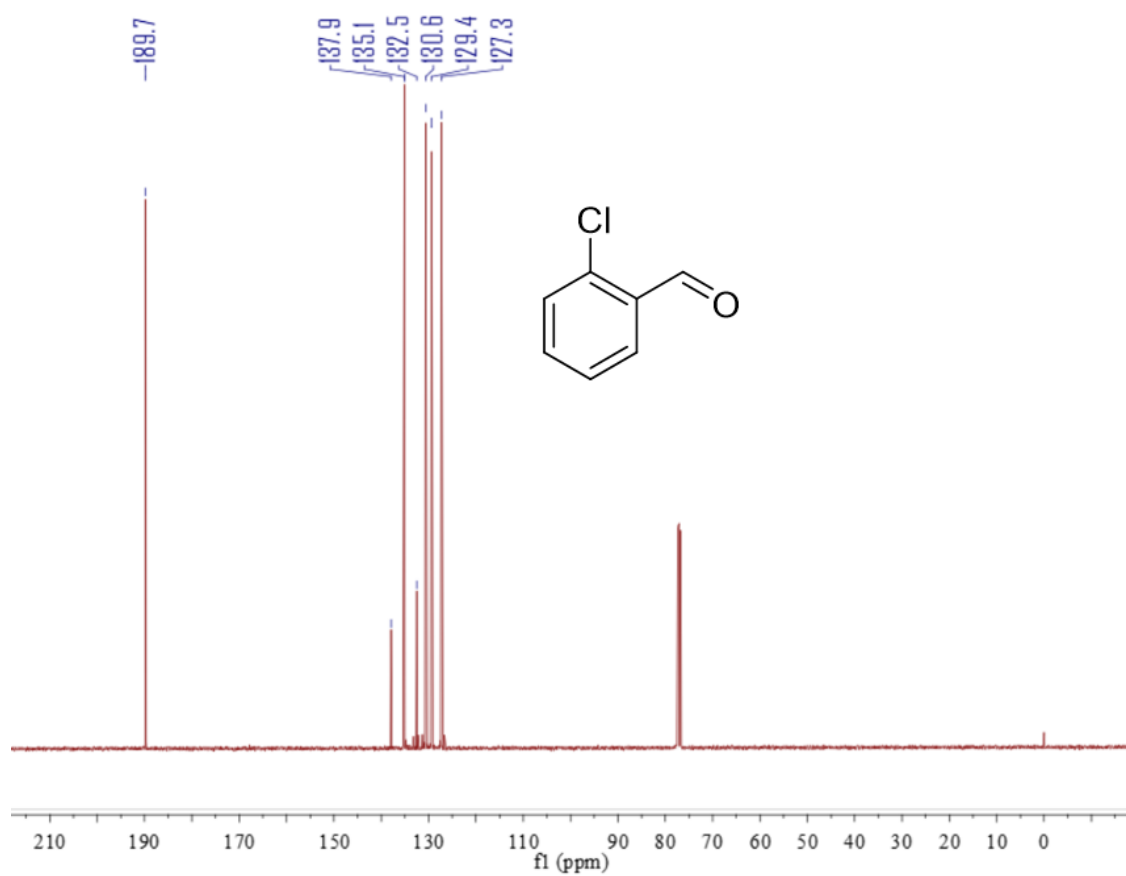

Compound 2i

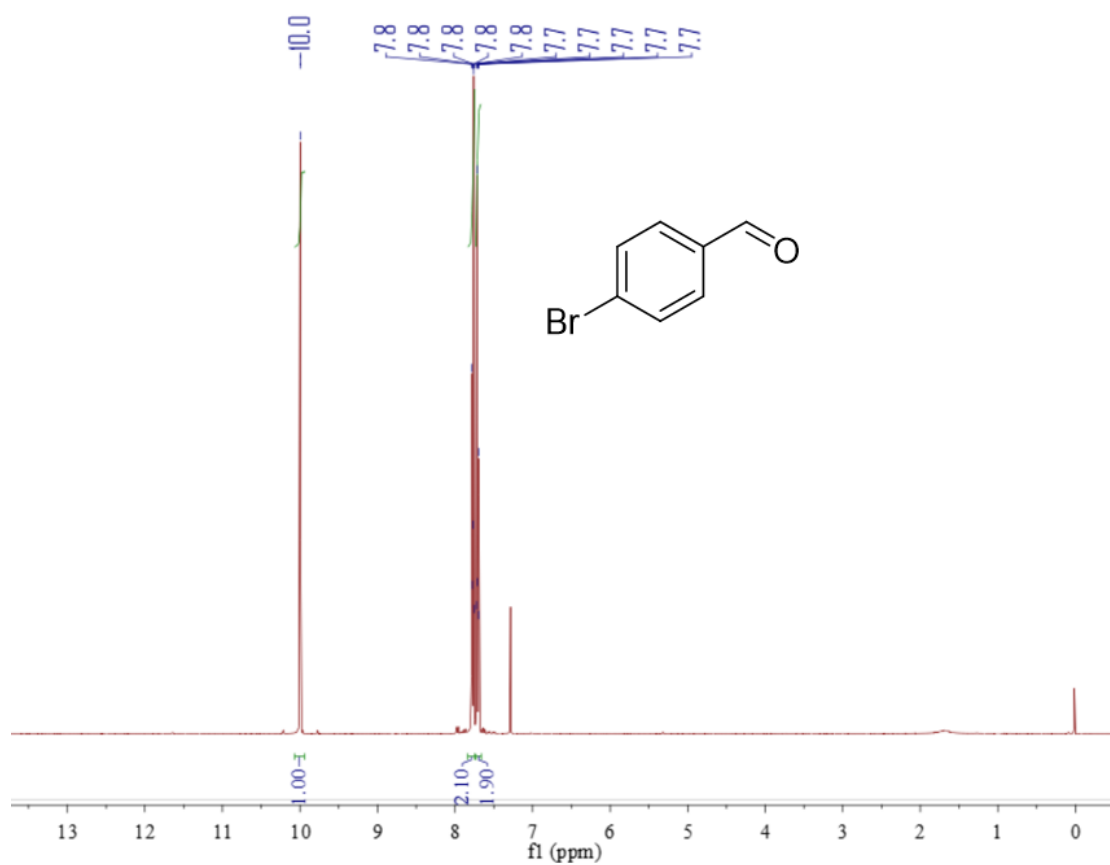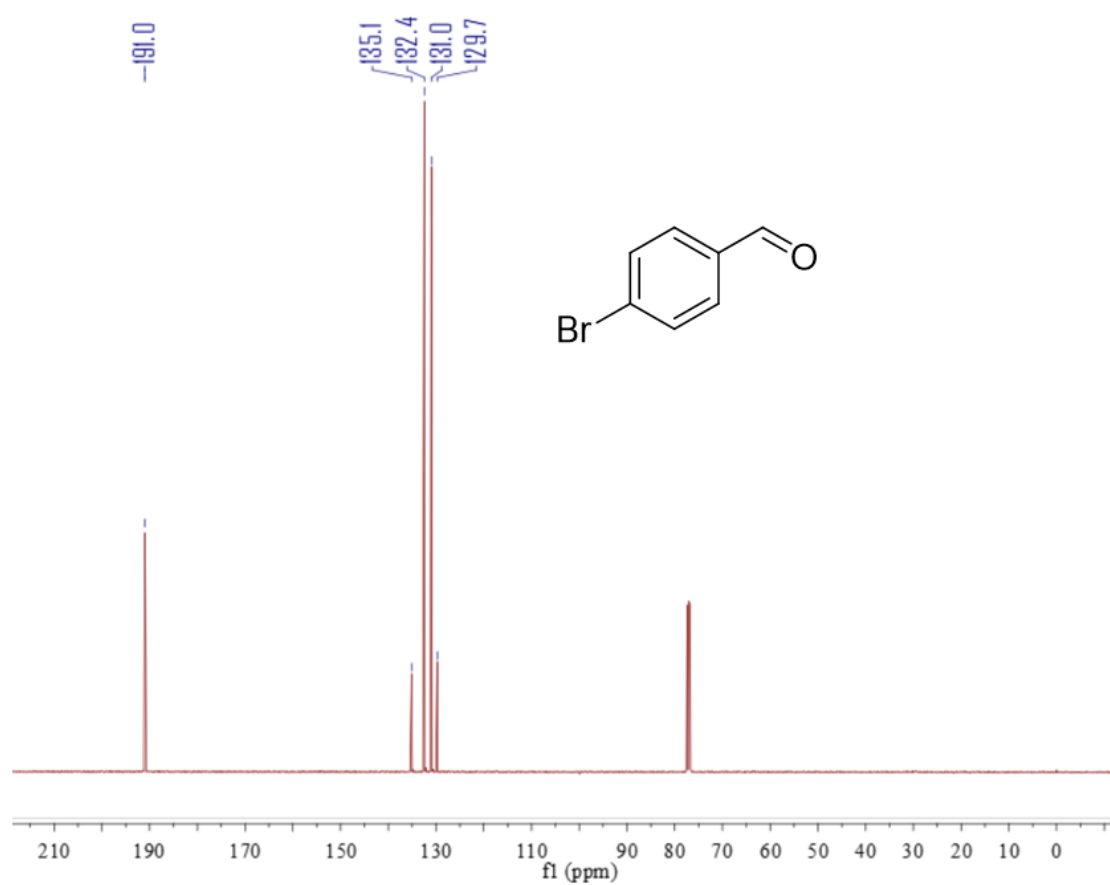

Compound 2j

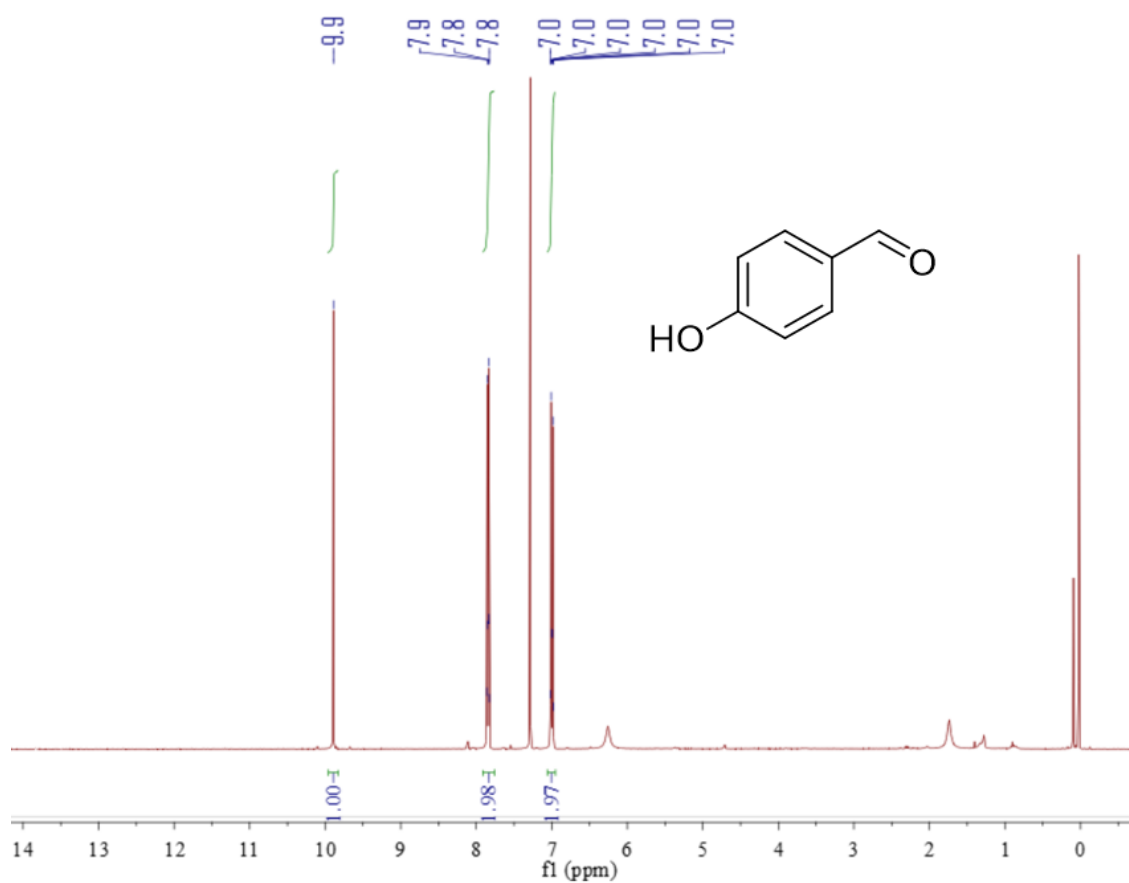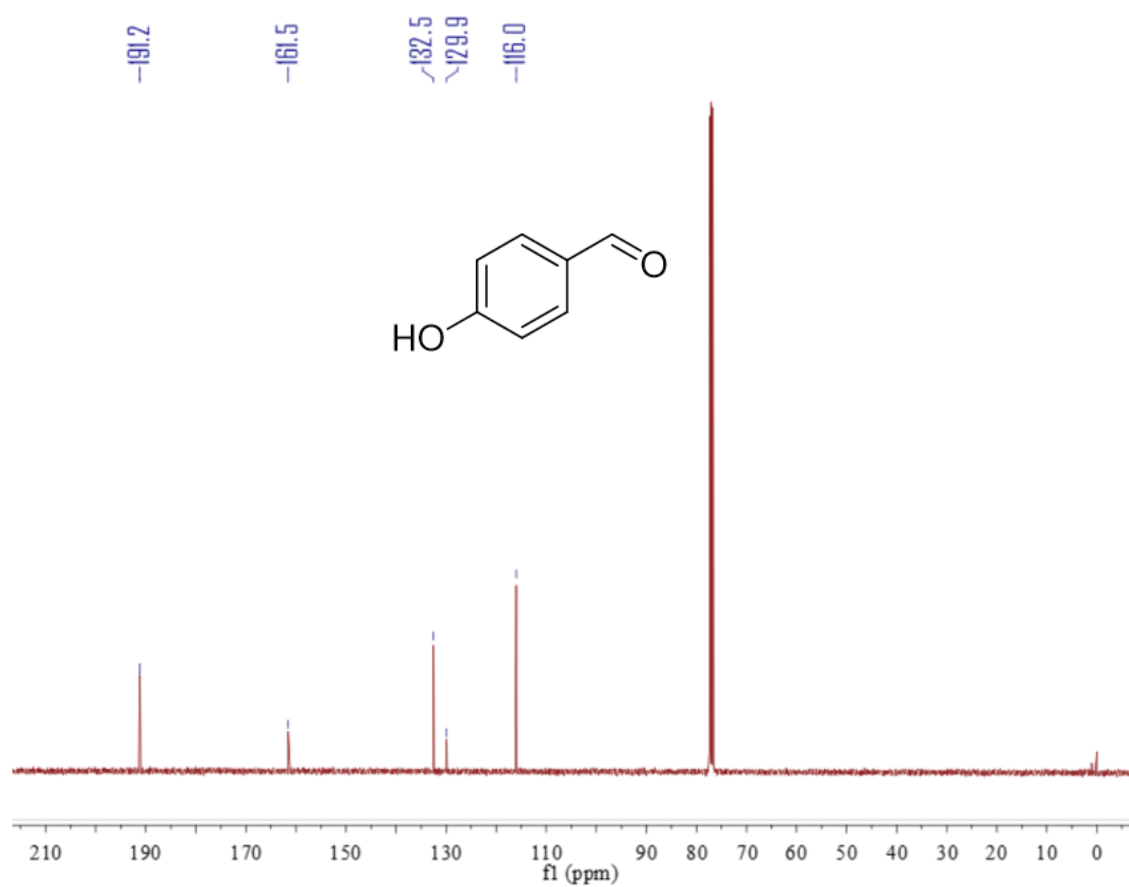

Compound 2k

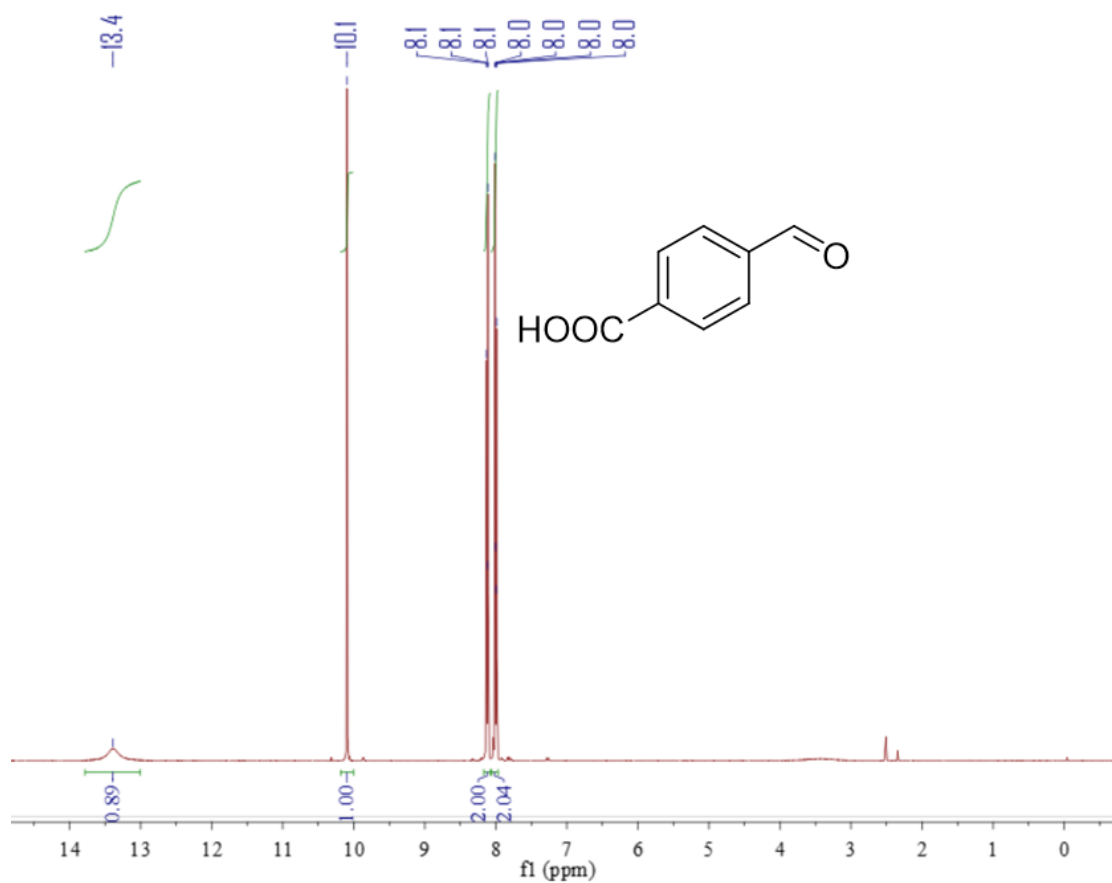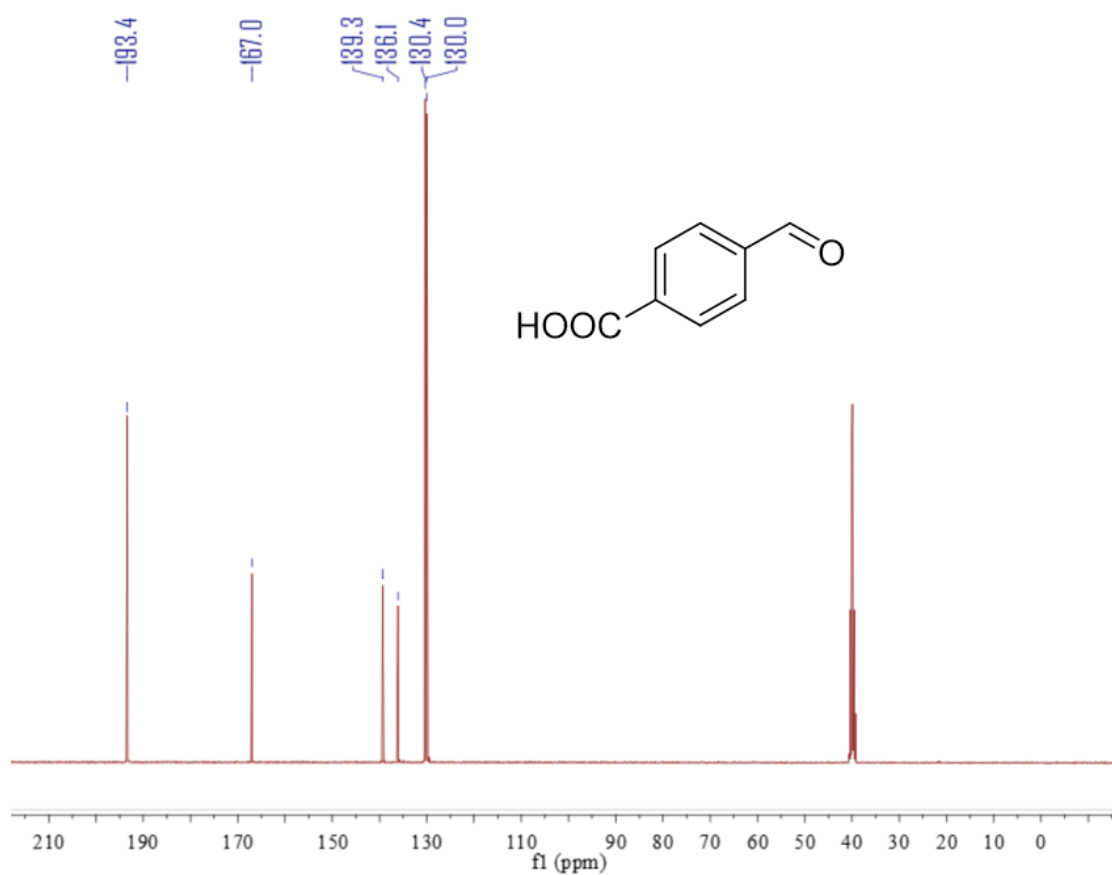

Compound 21

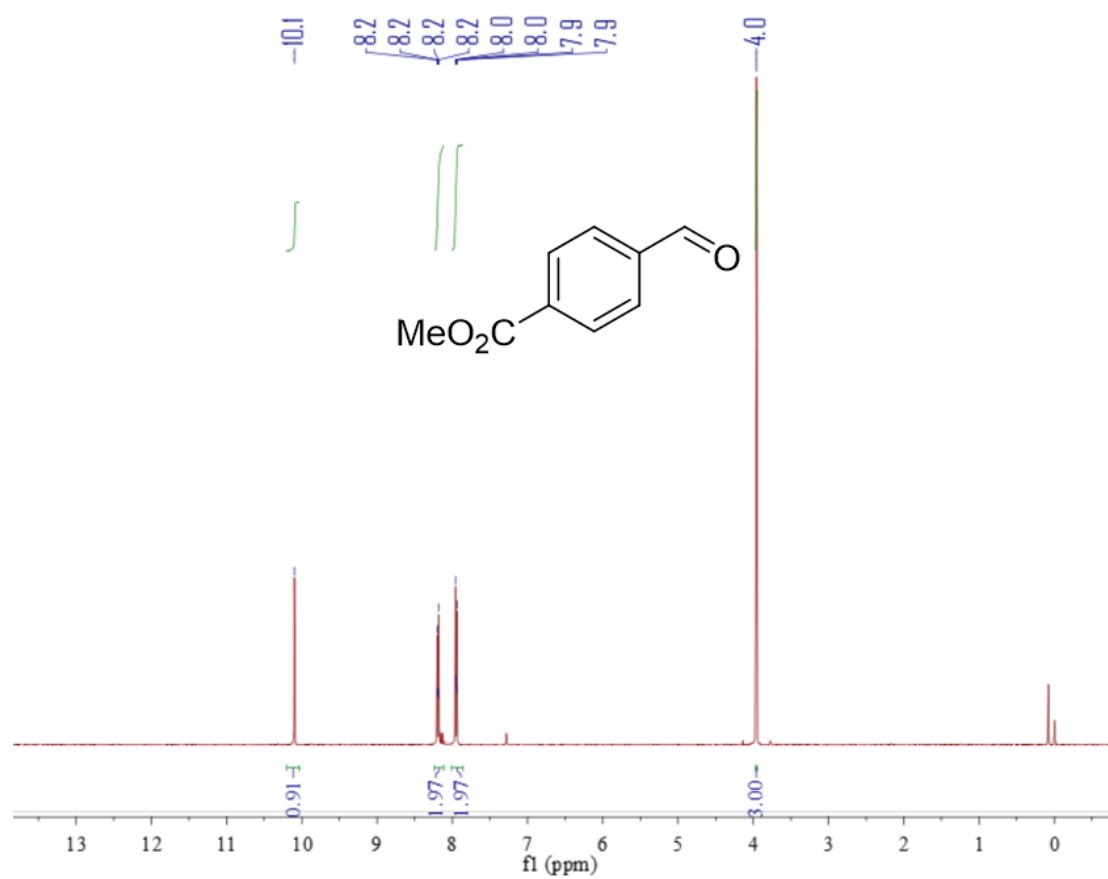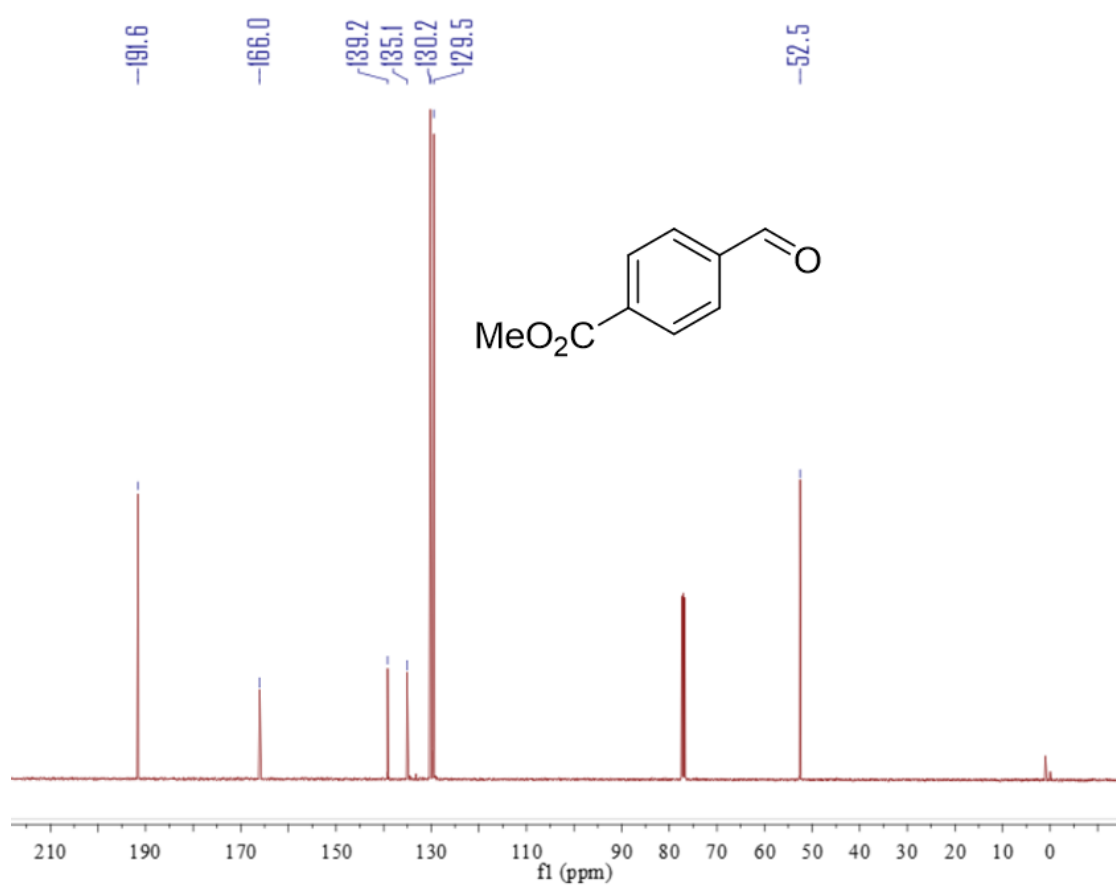

Compound 2m

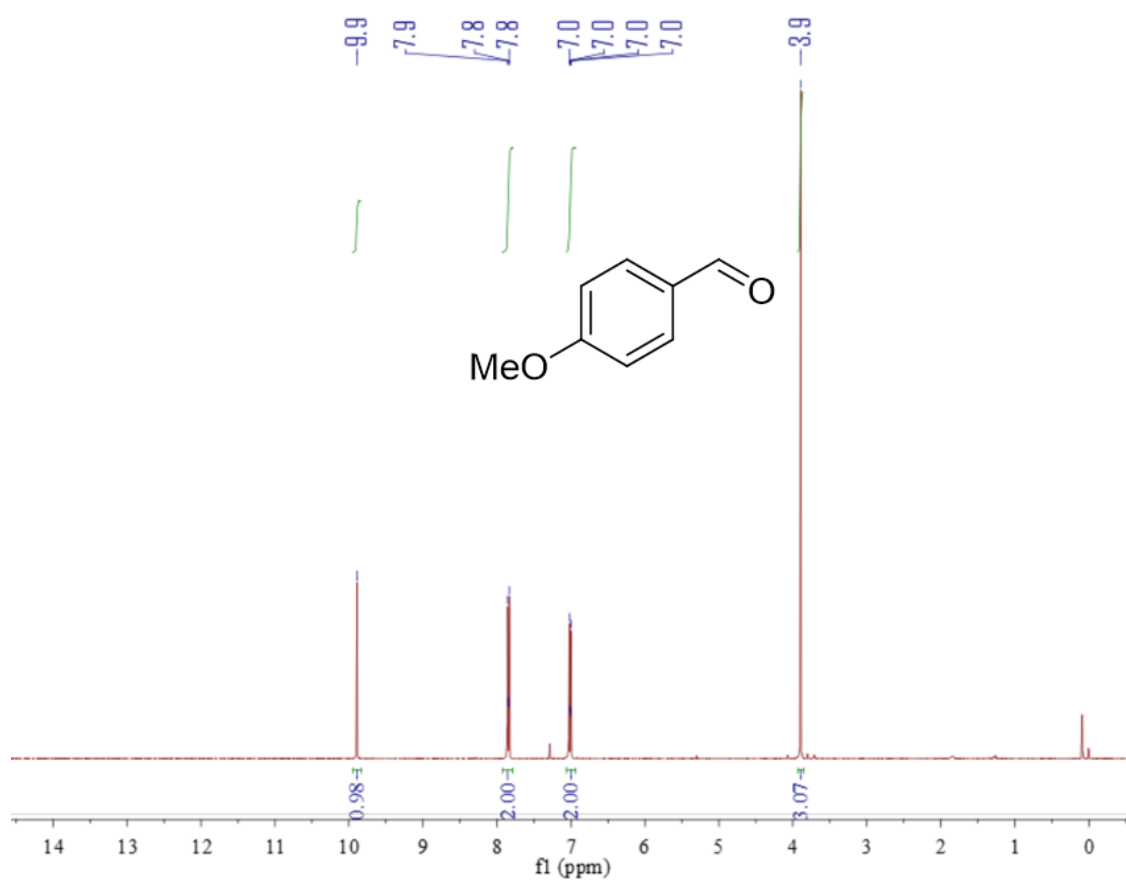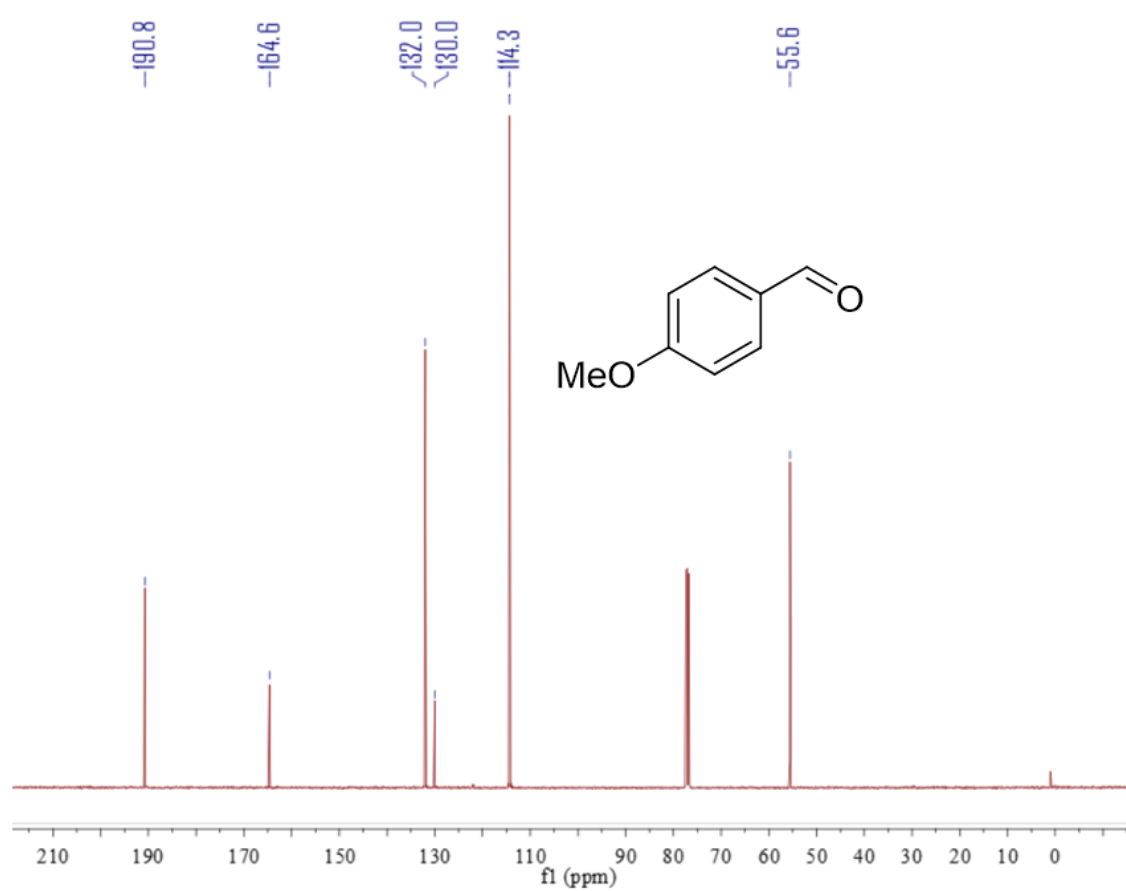

Compound 2n



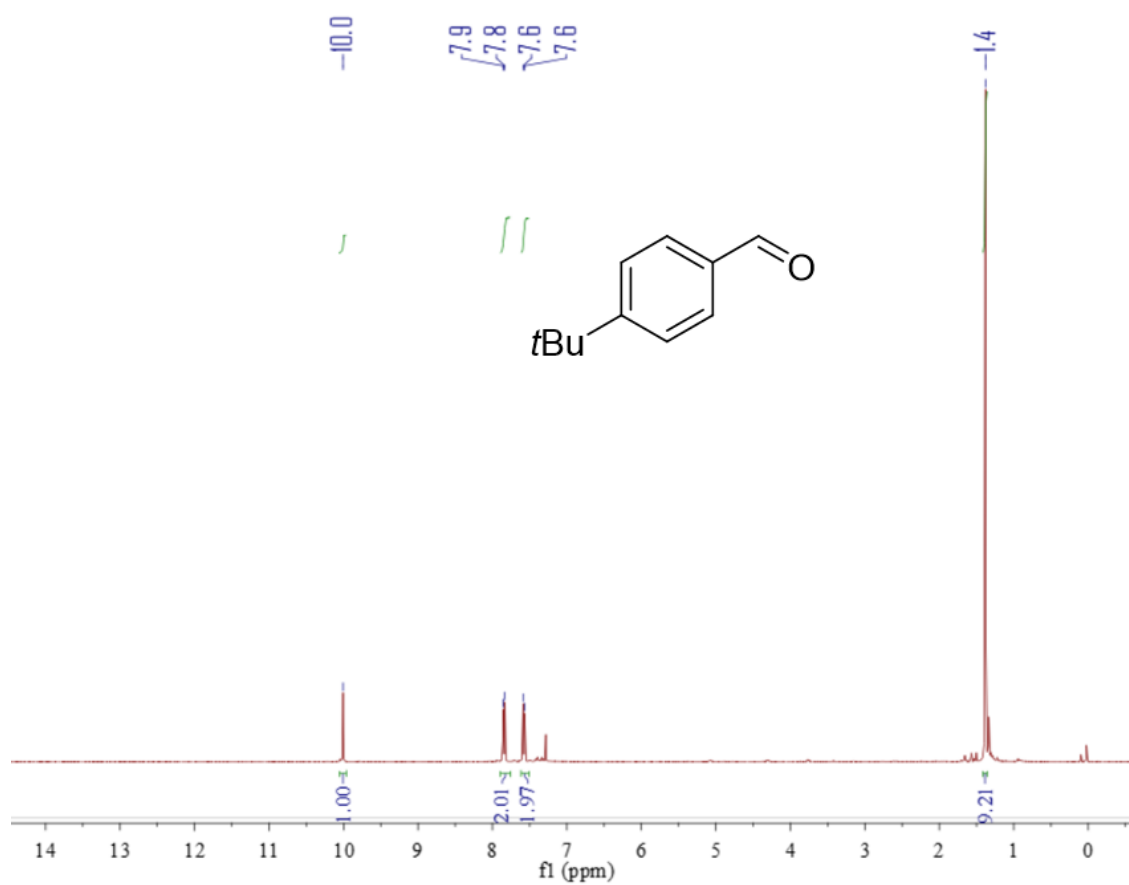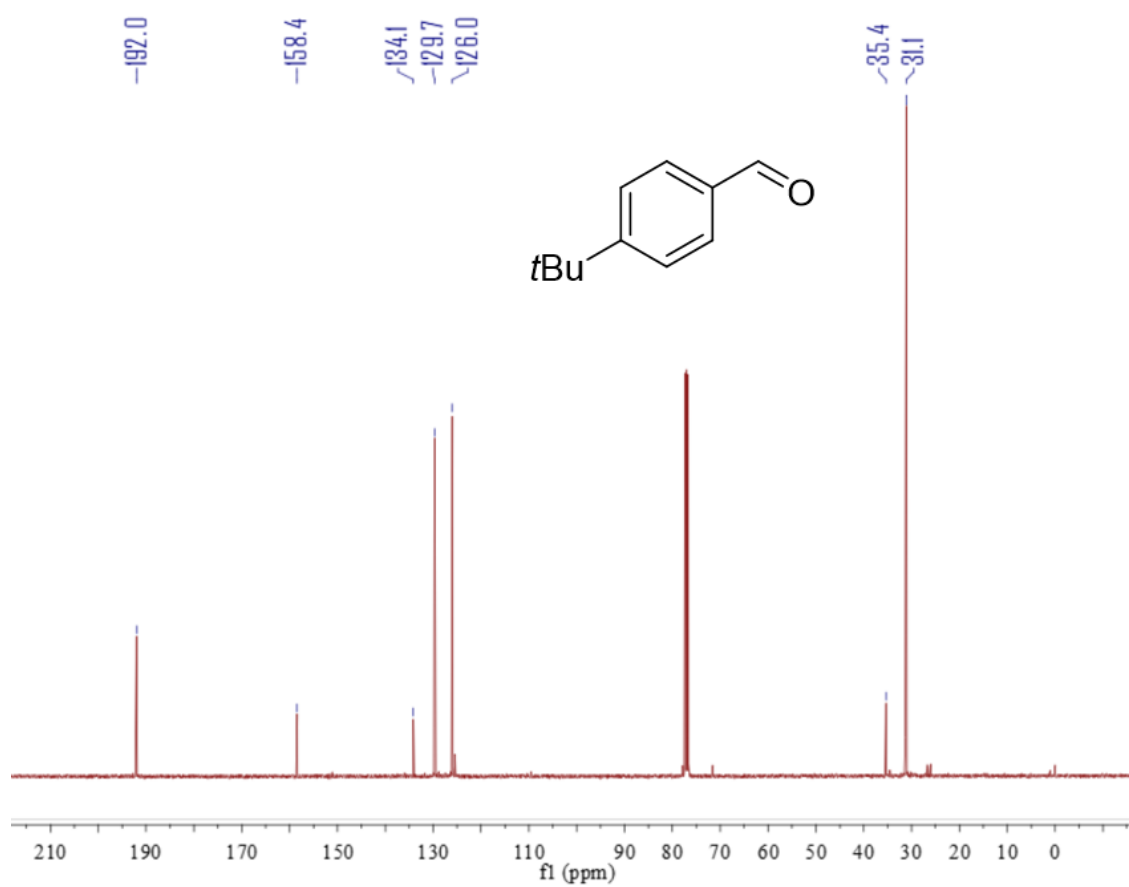

Compound 2o

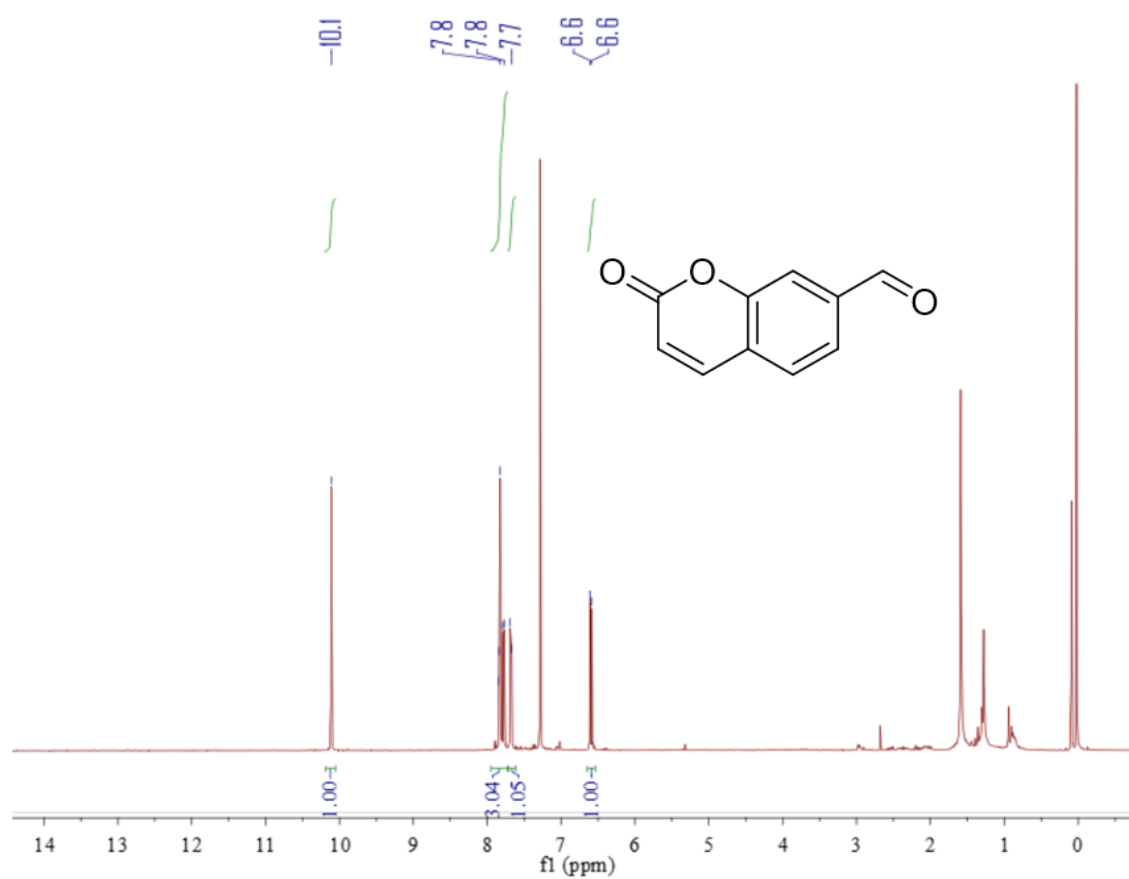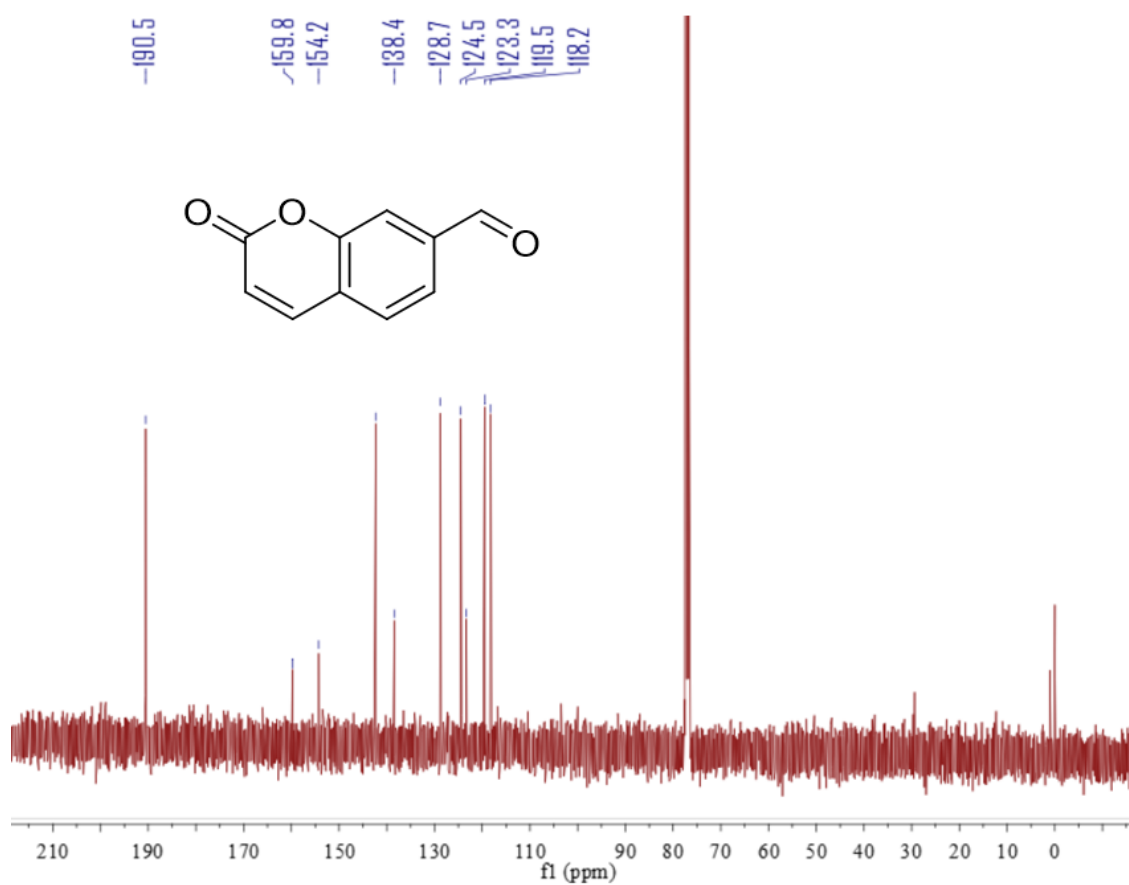

Compound 2p

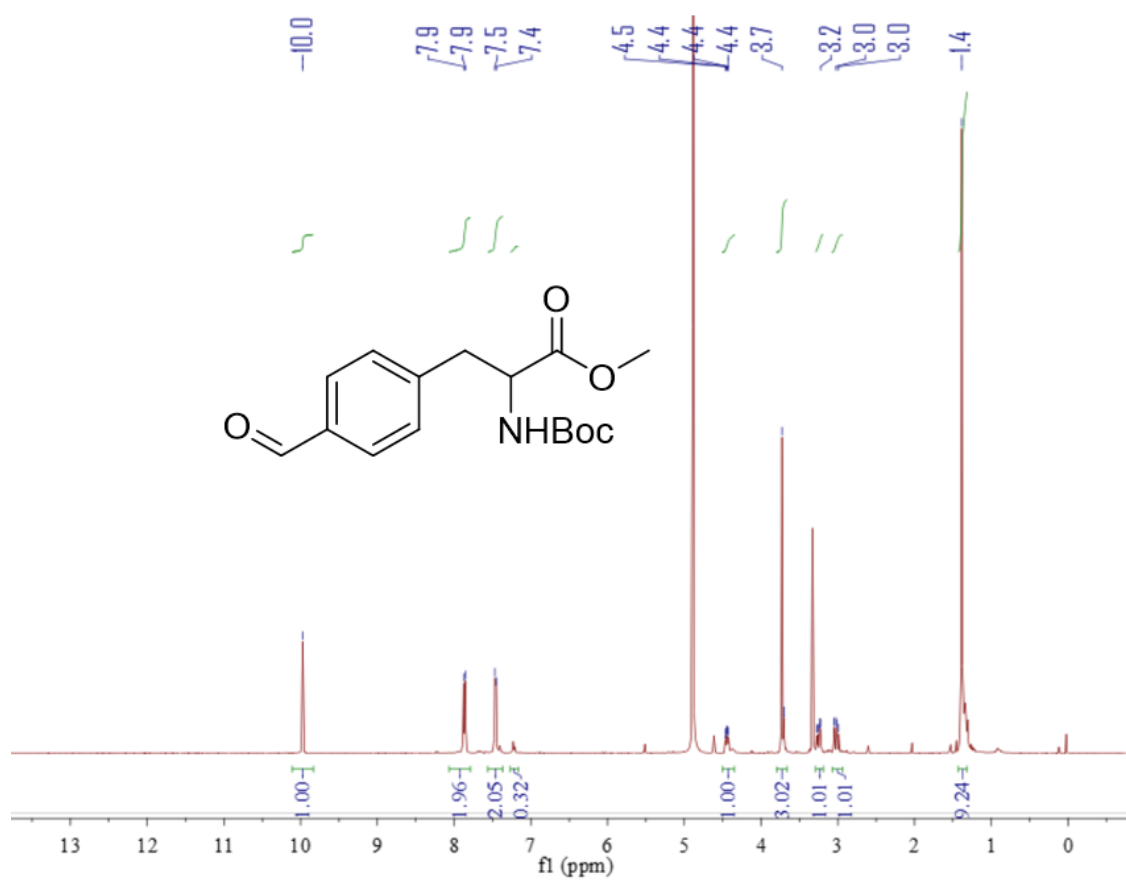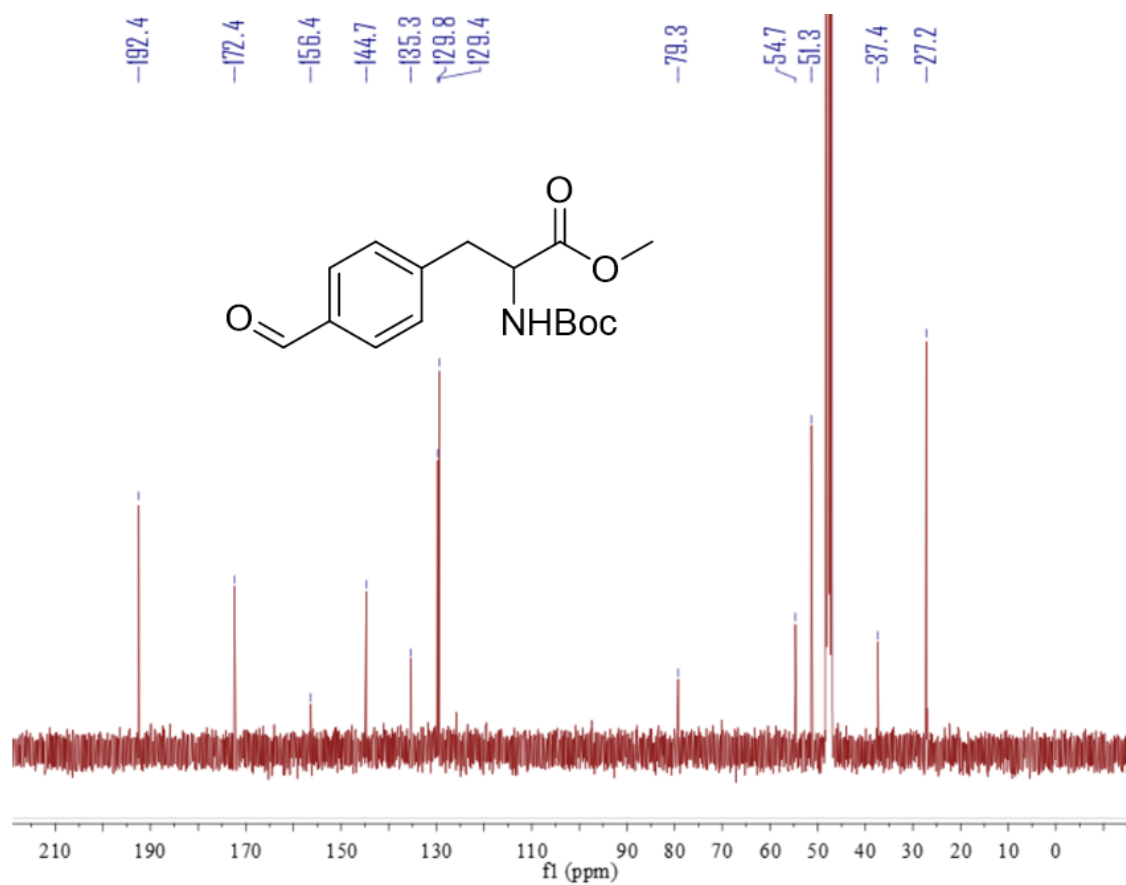

Compound 2q

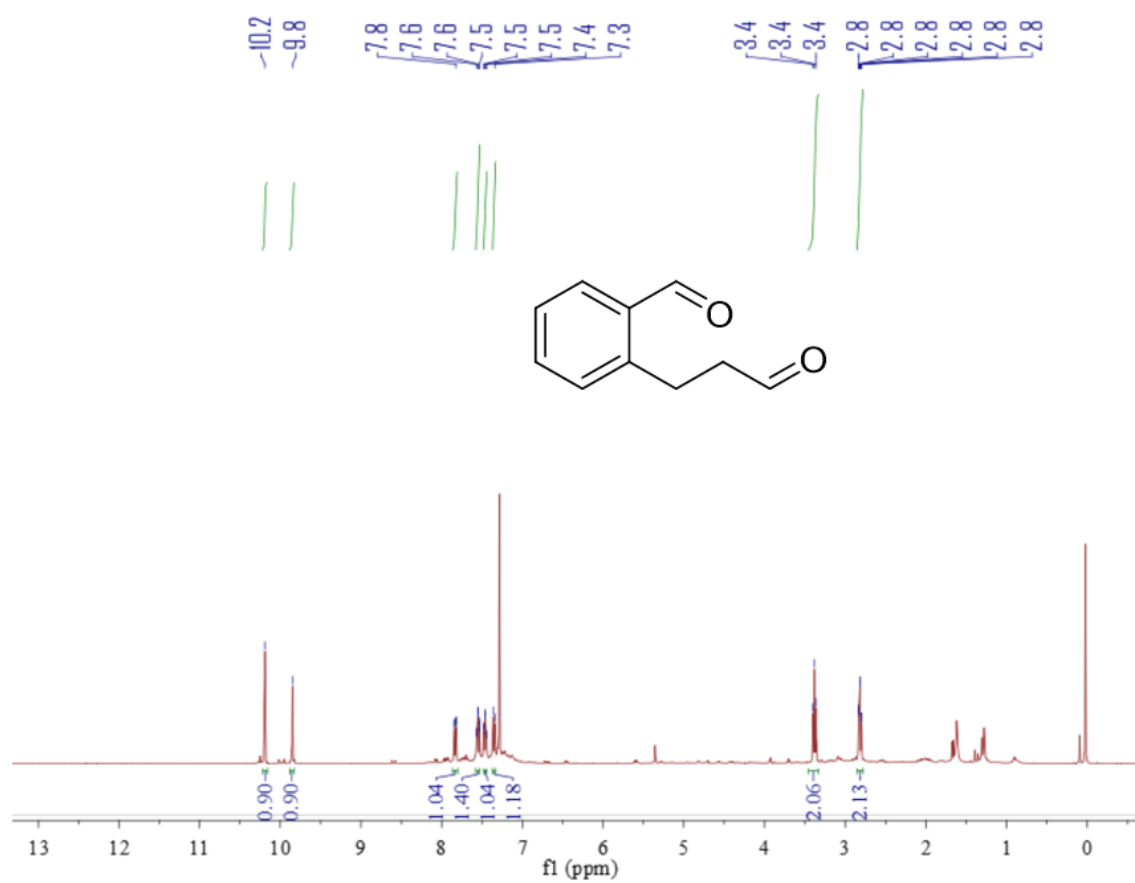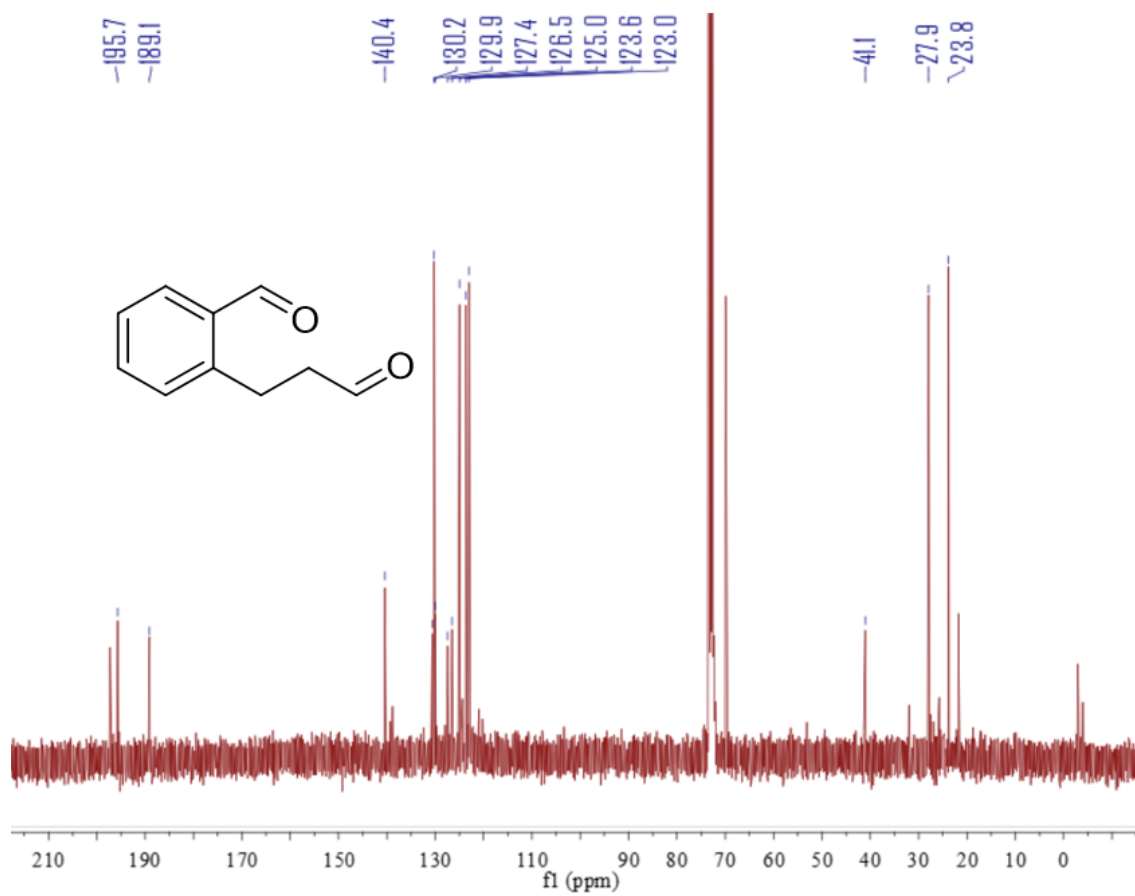

Compound 4a

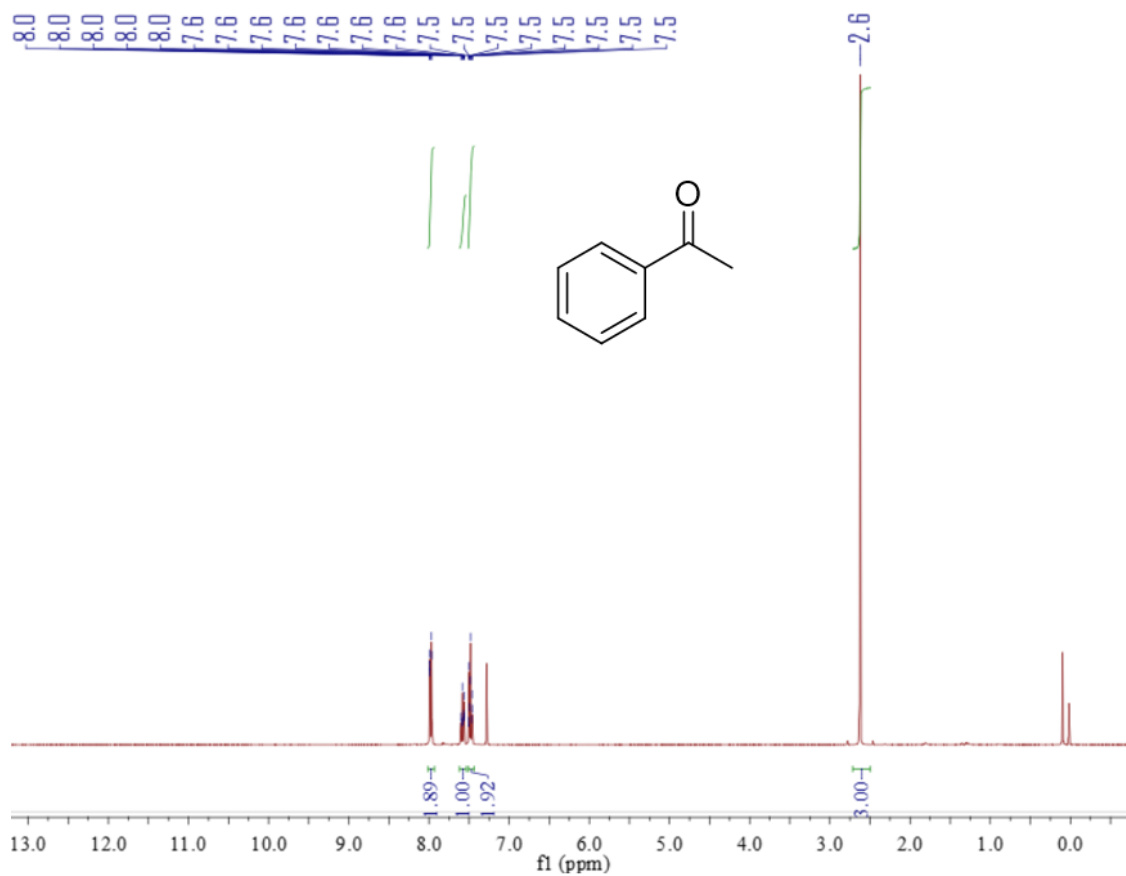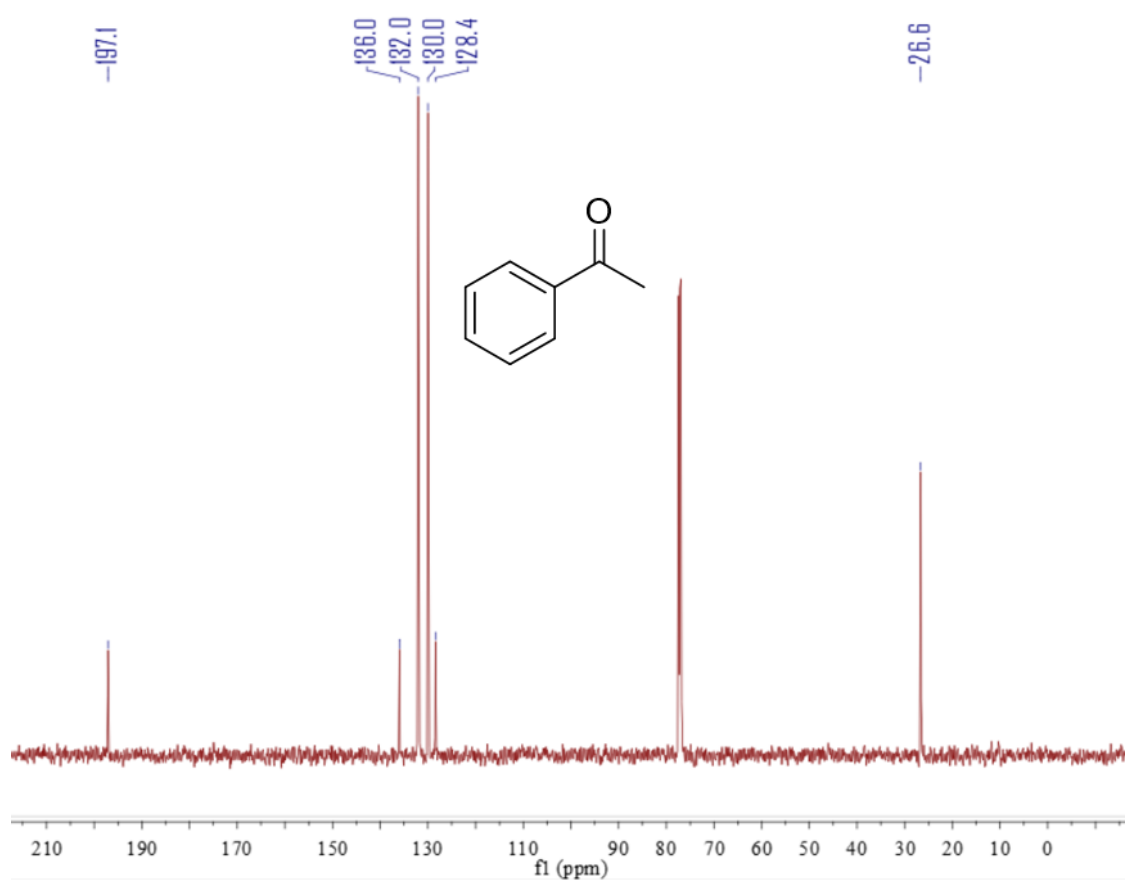

Compound 4b

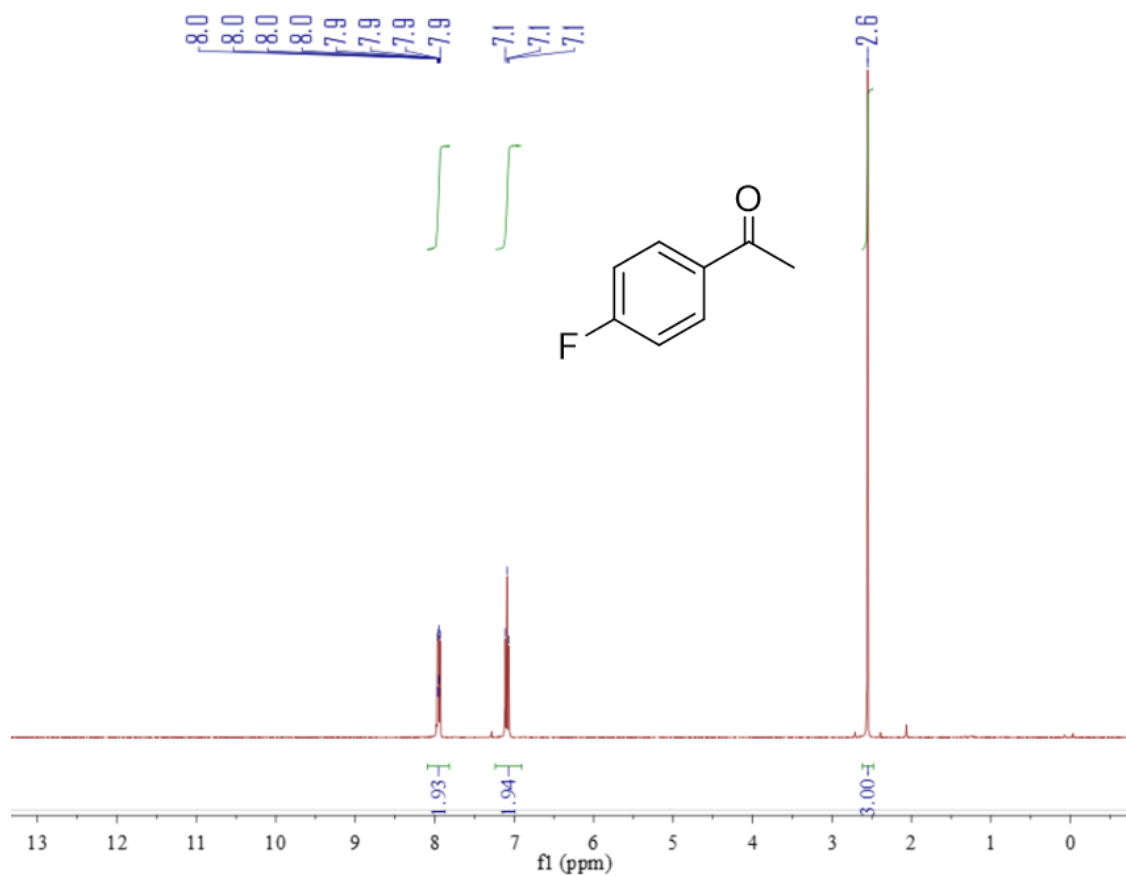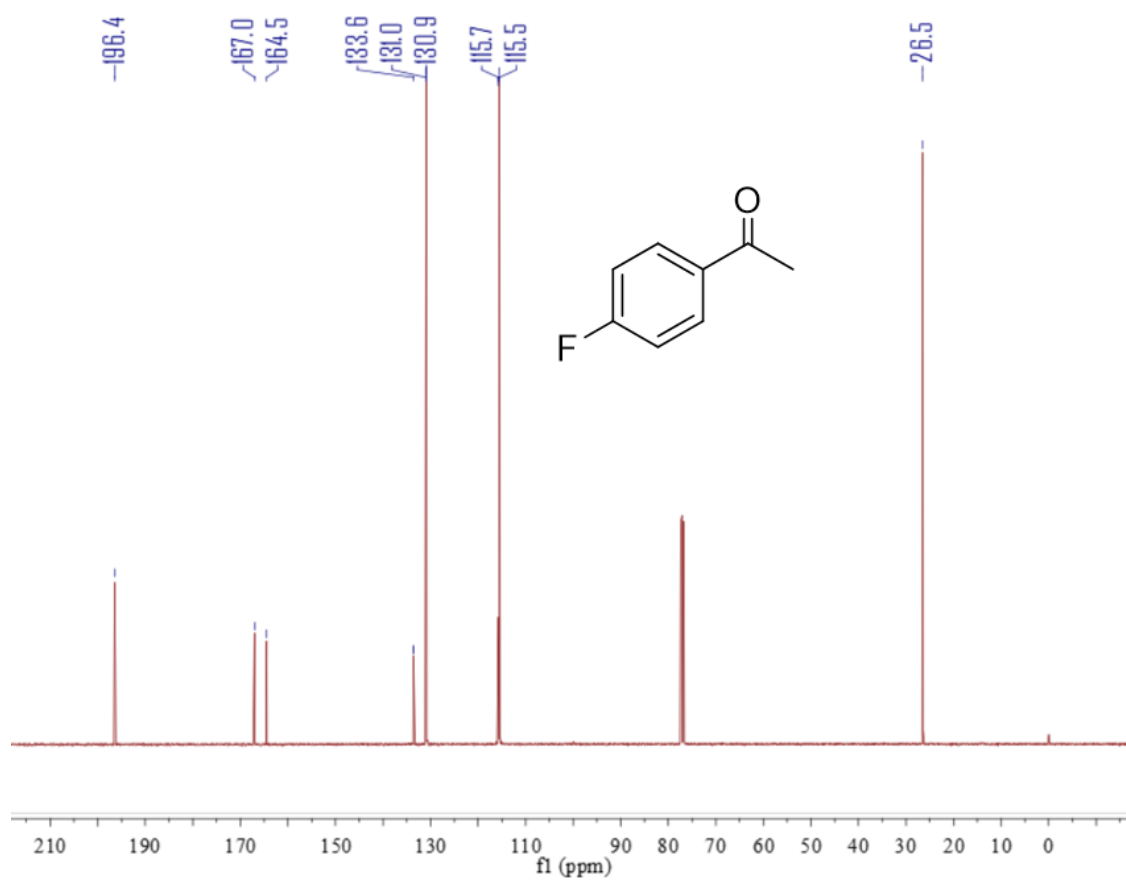

Compound 4c

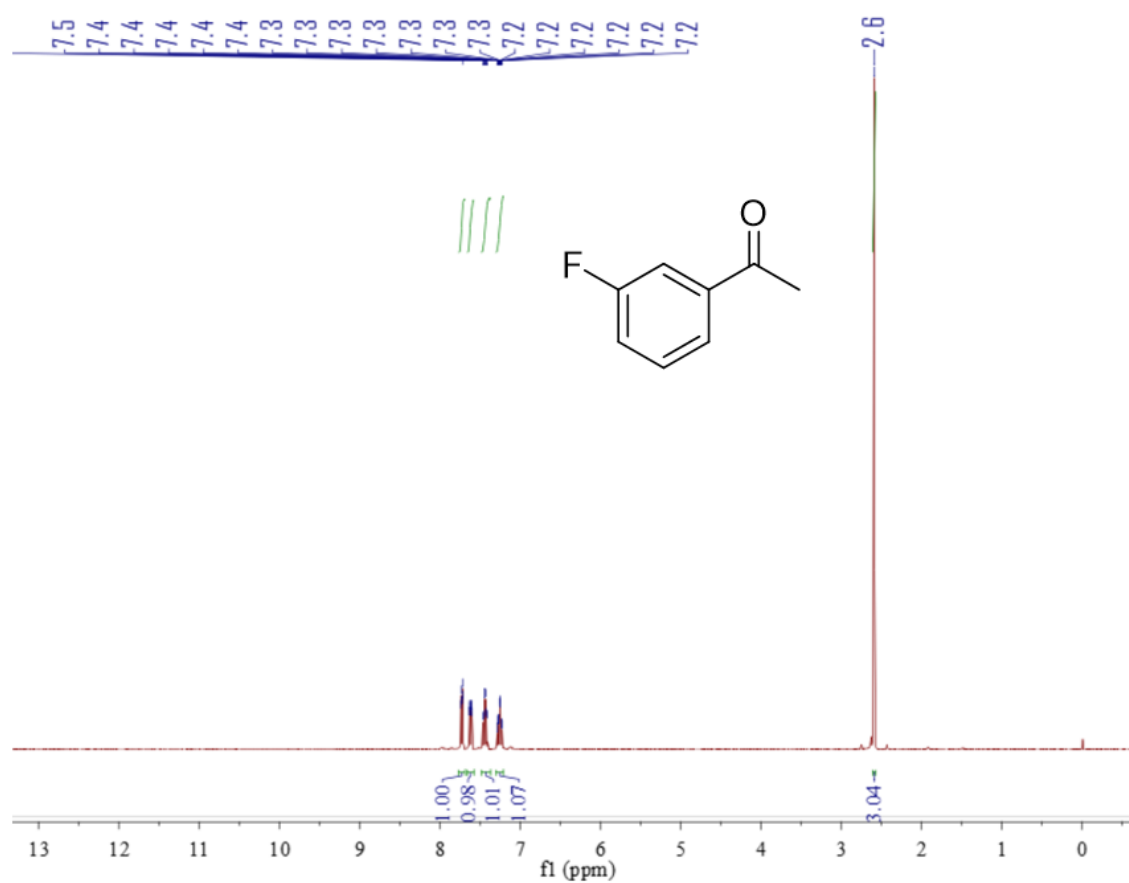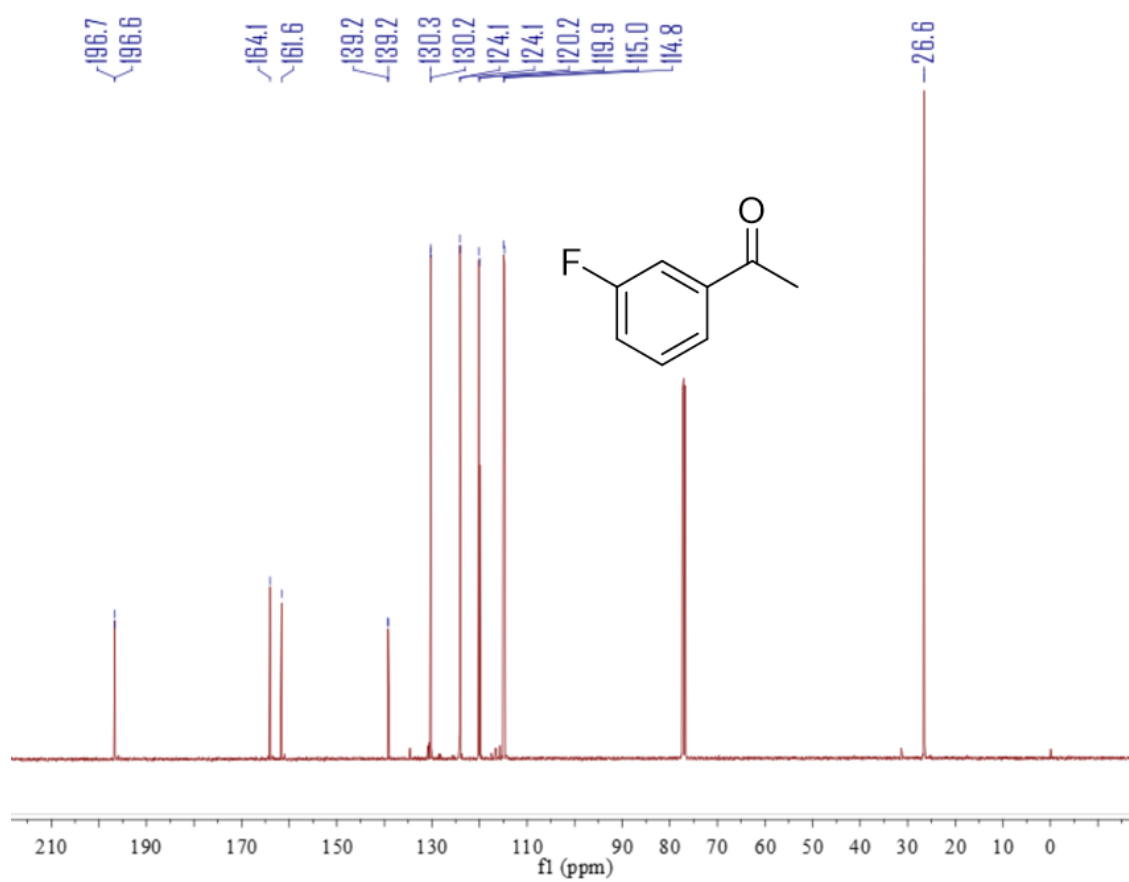

Compound 4d

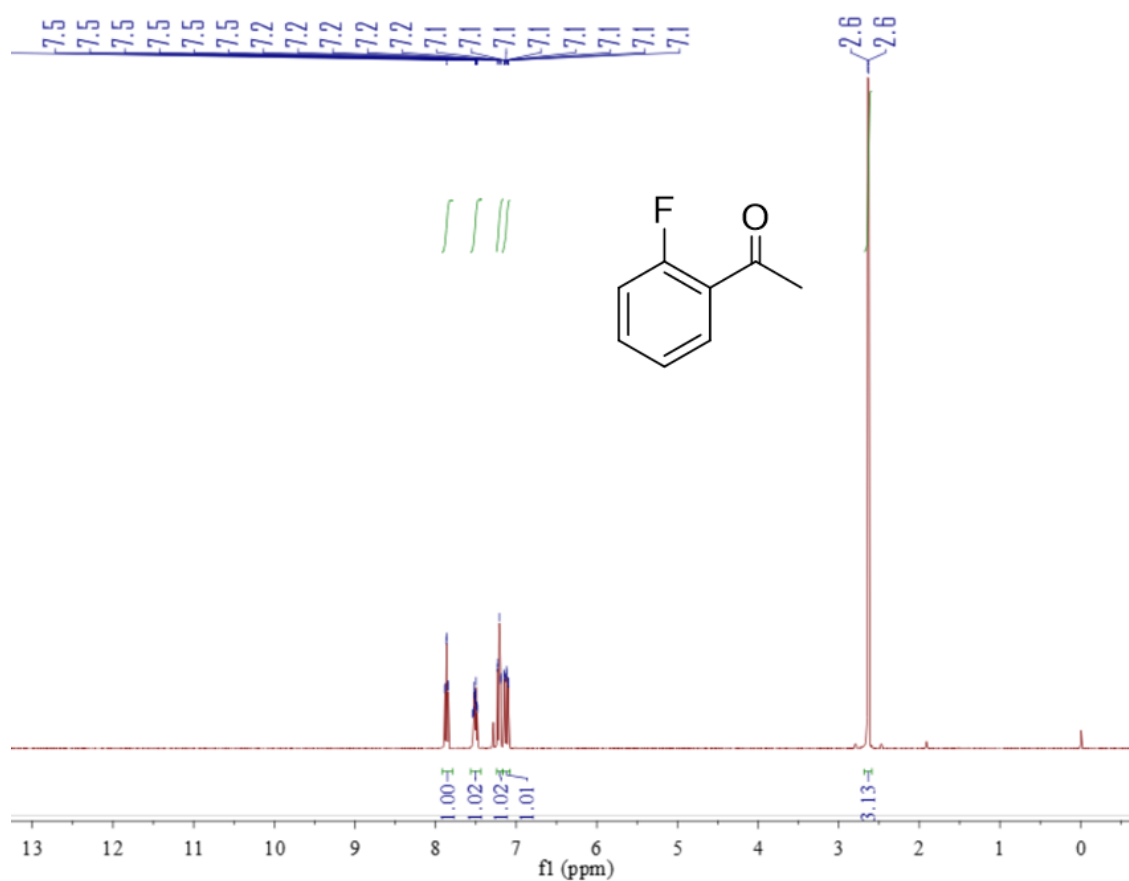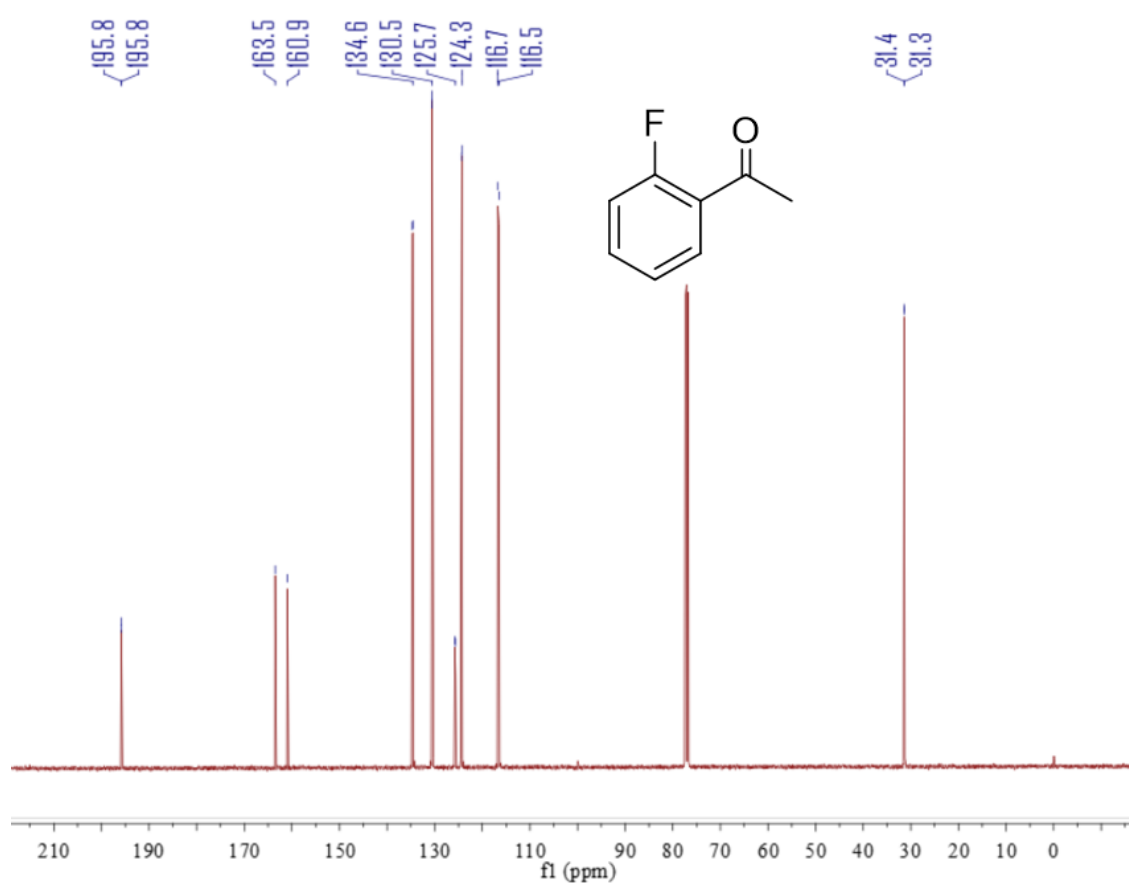

Compound 4e



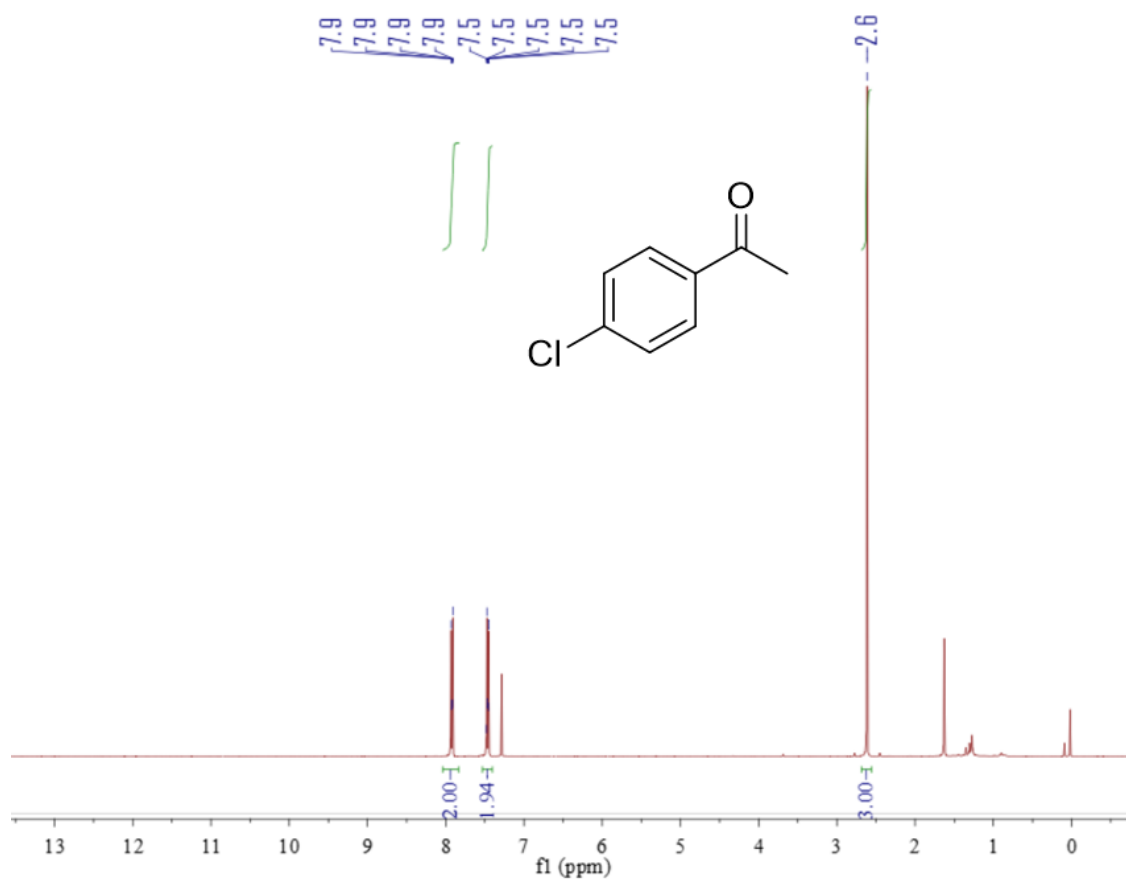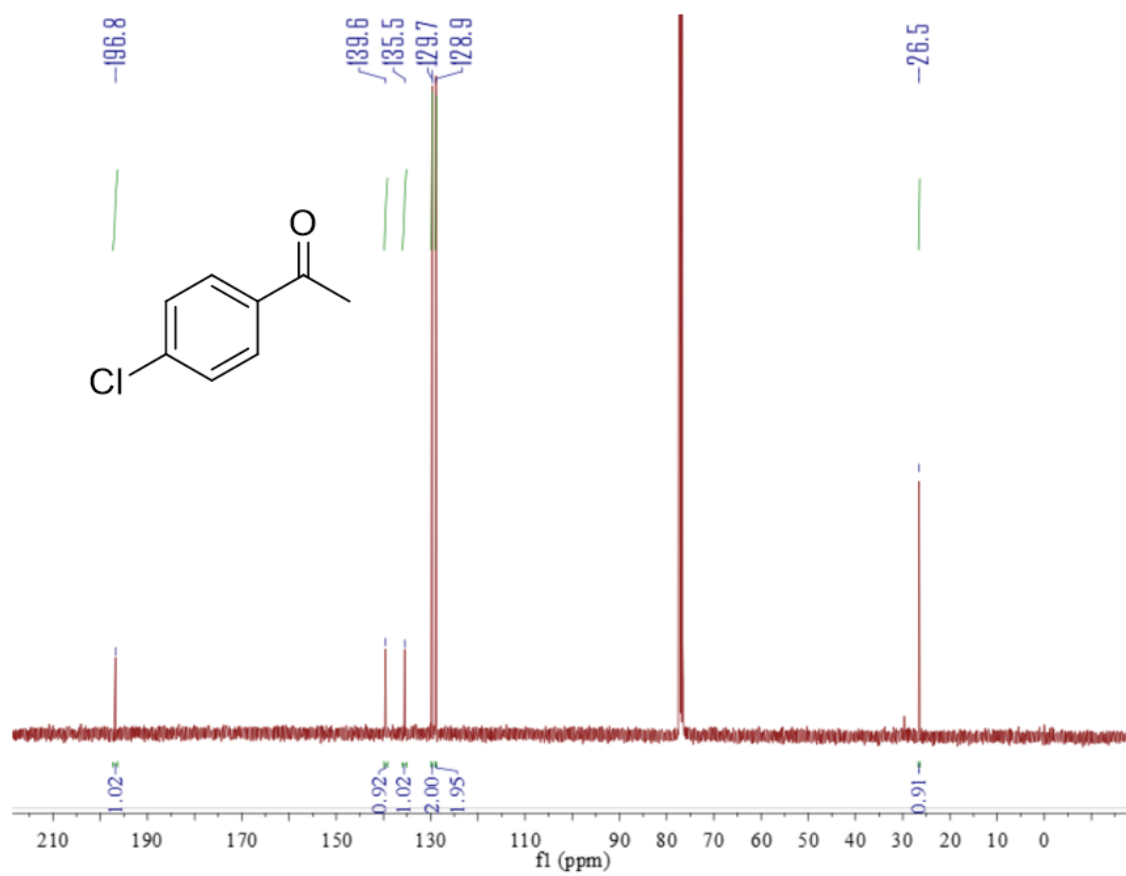

Compound 4f

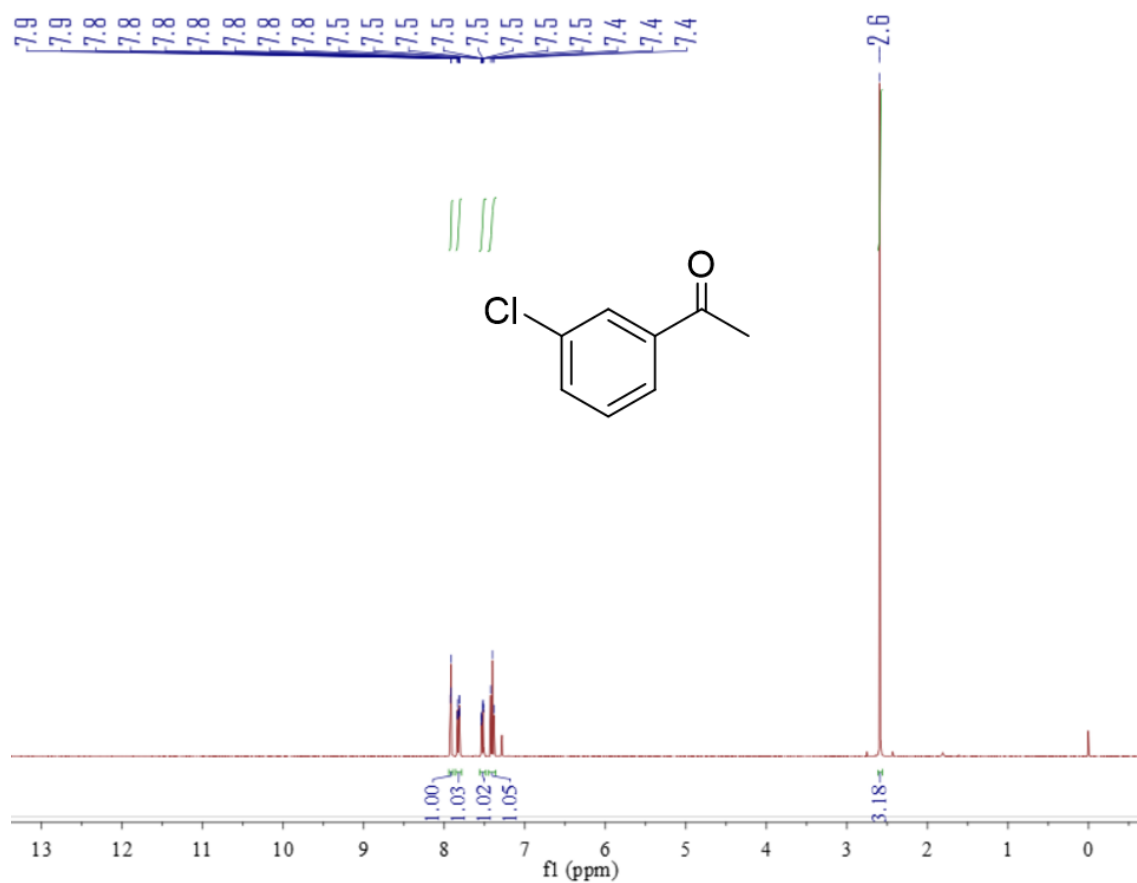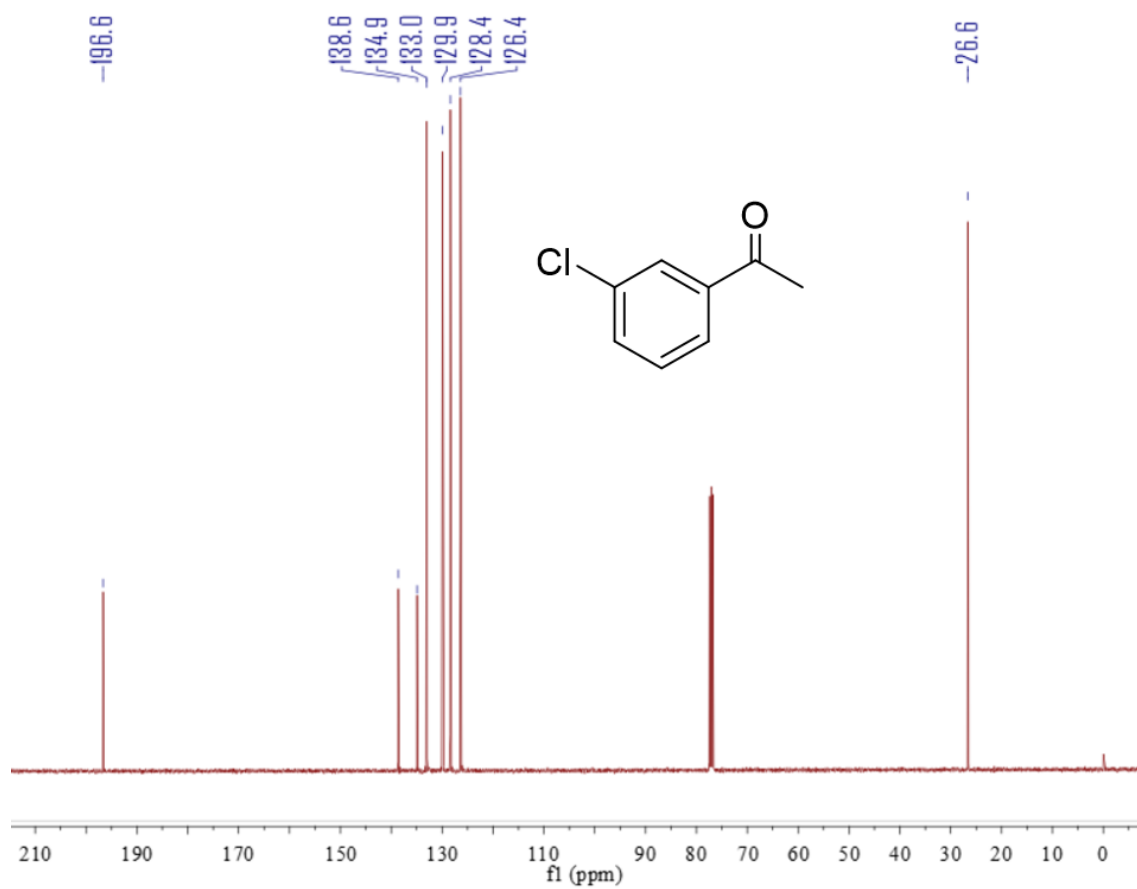

Compound 4g

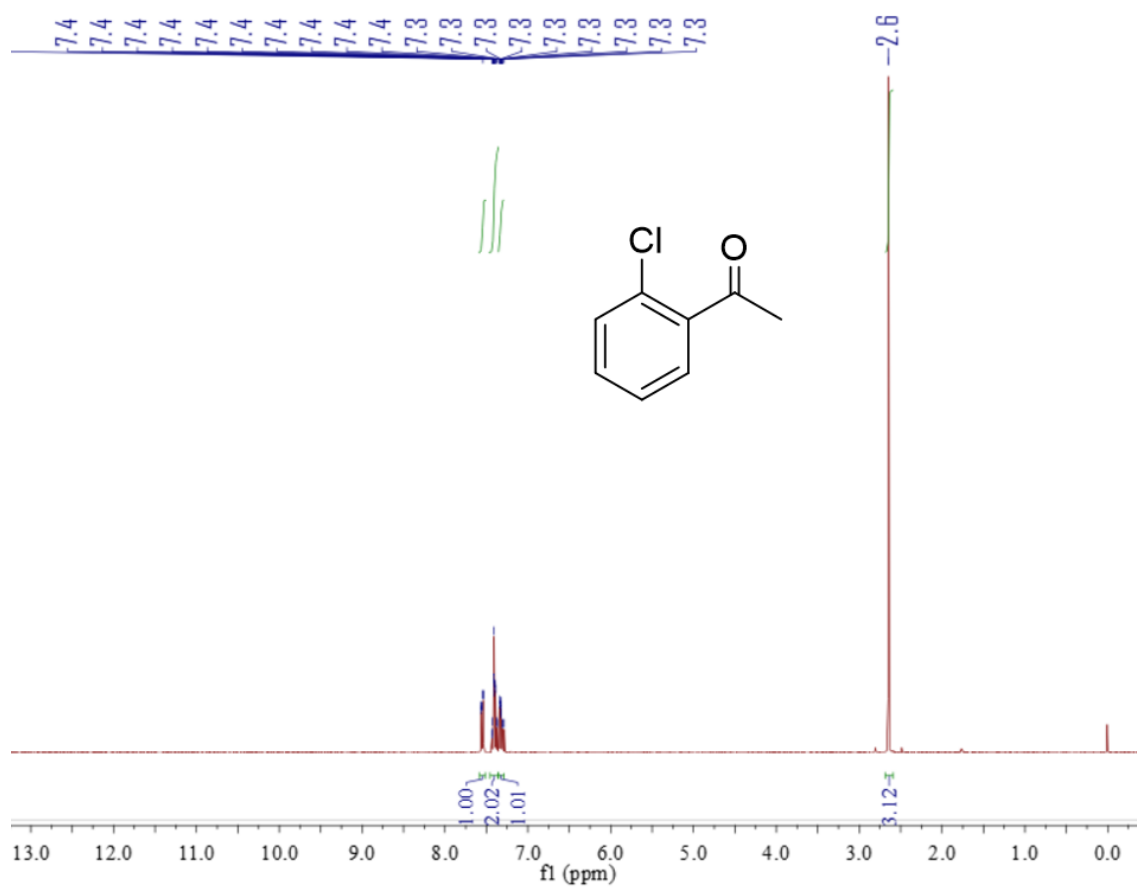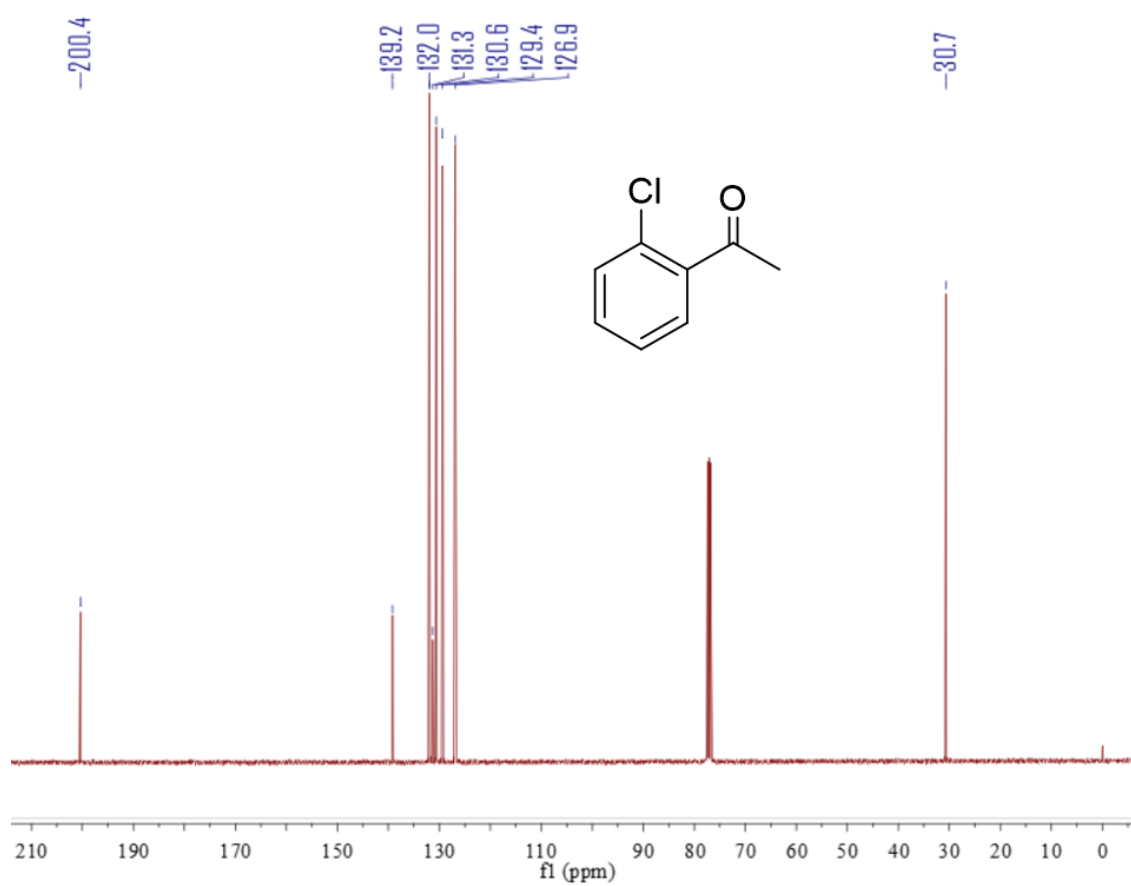

Compound 4h

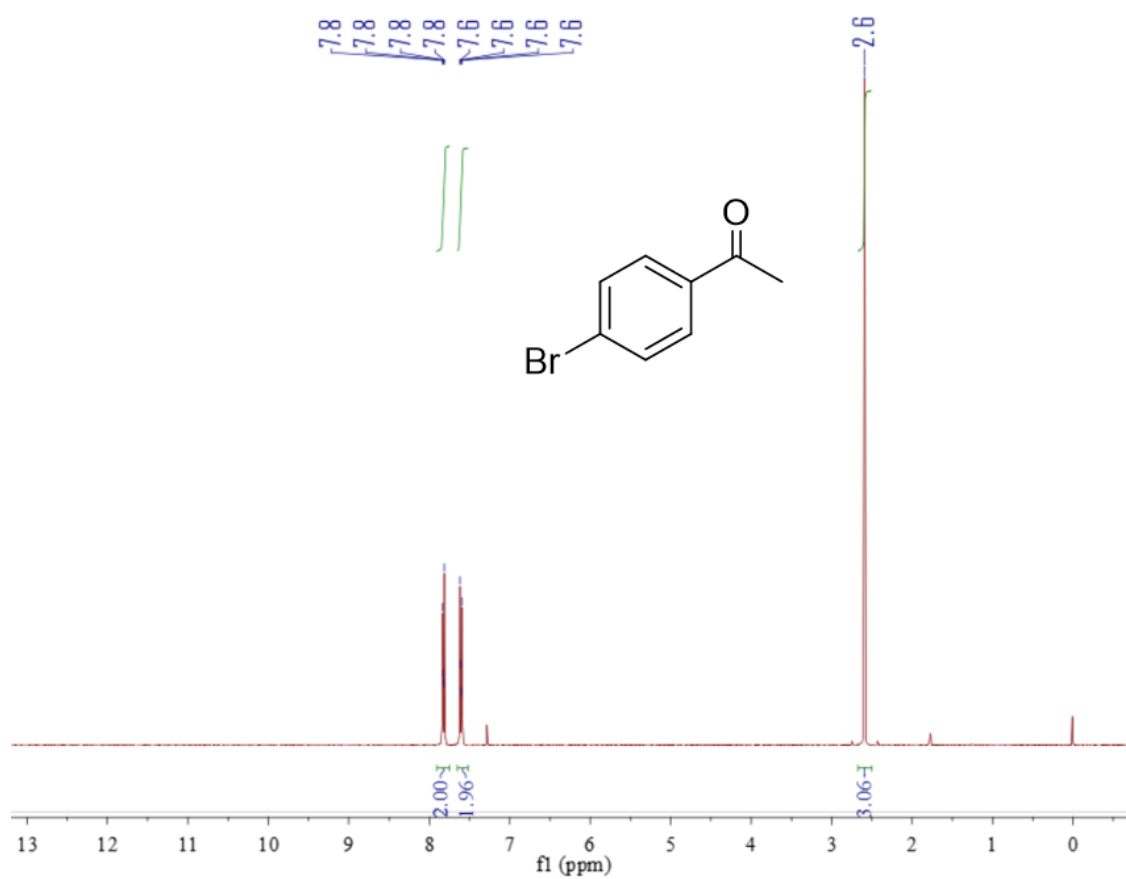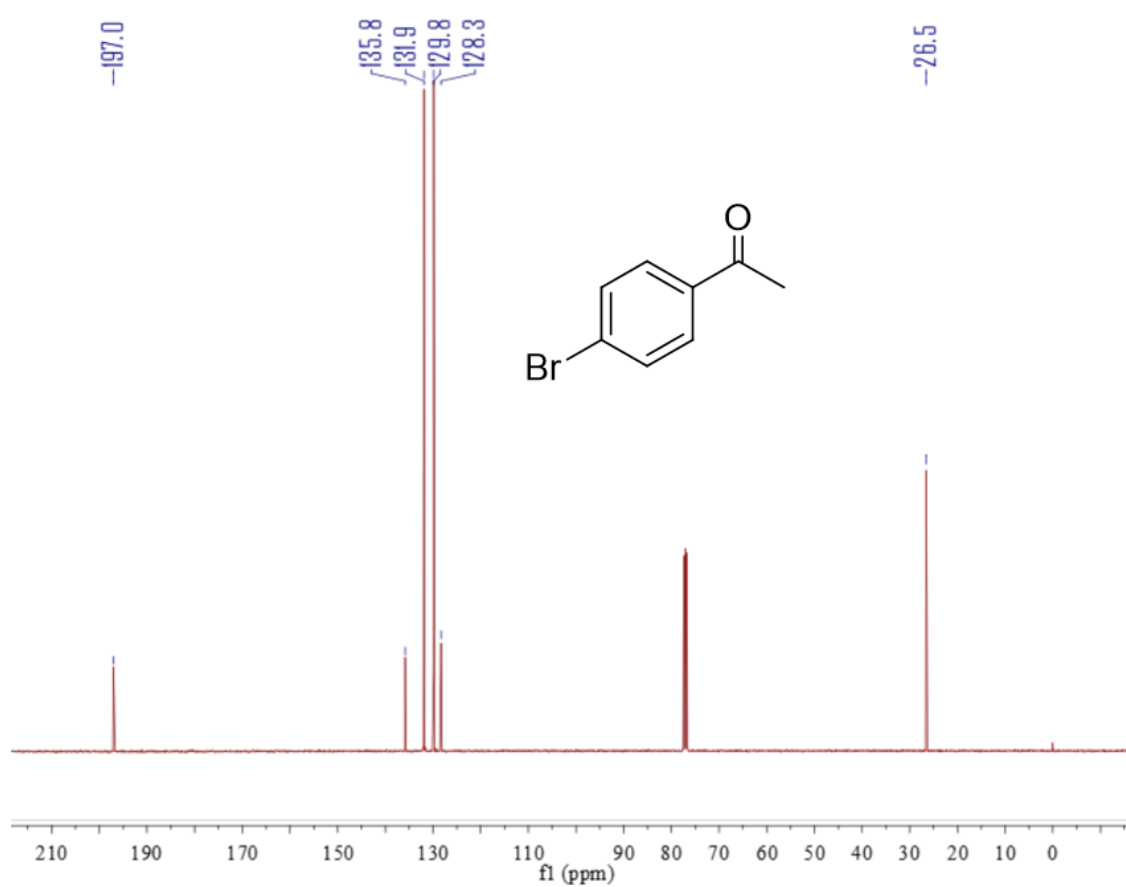

Compound 4i

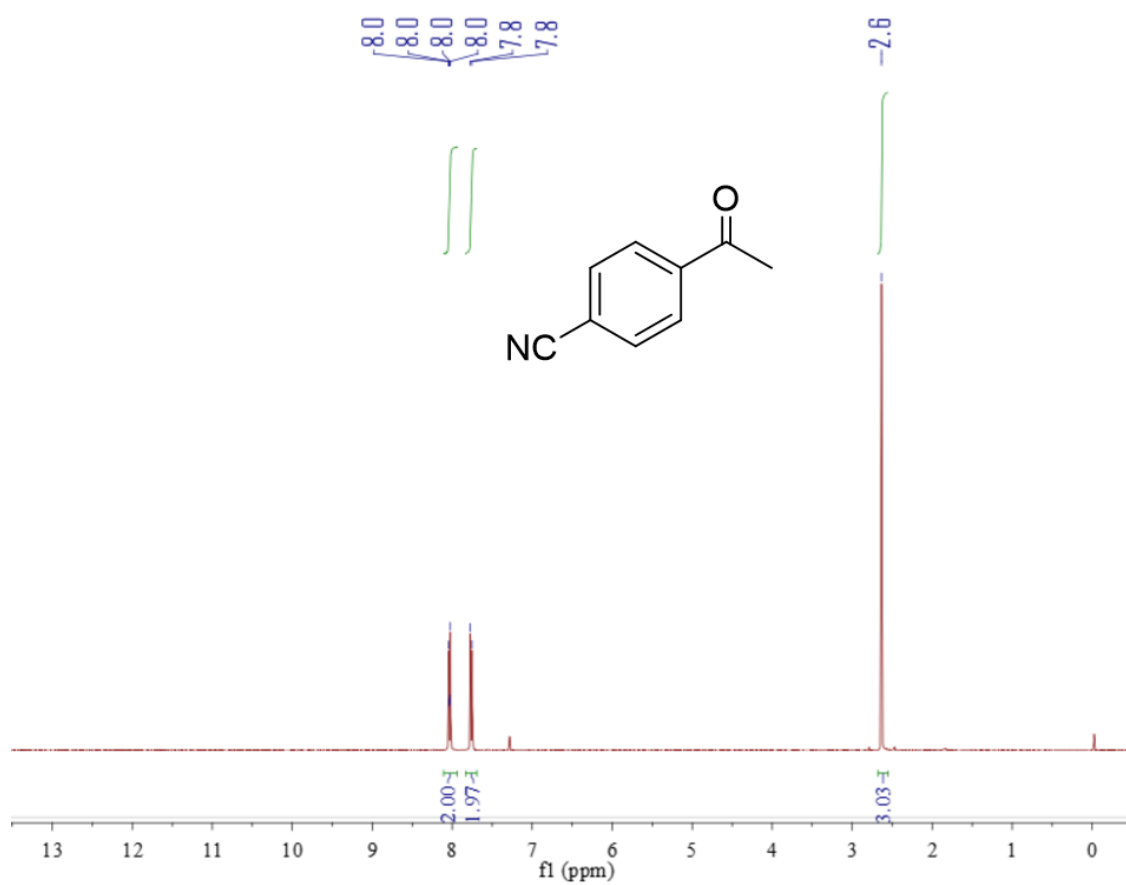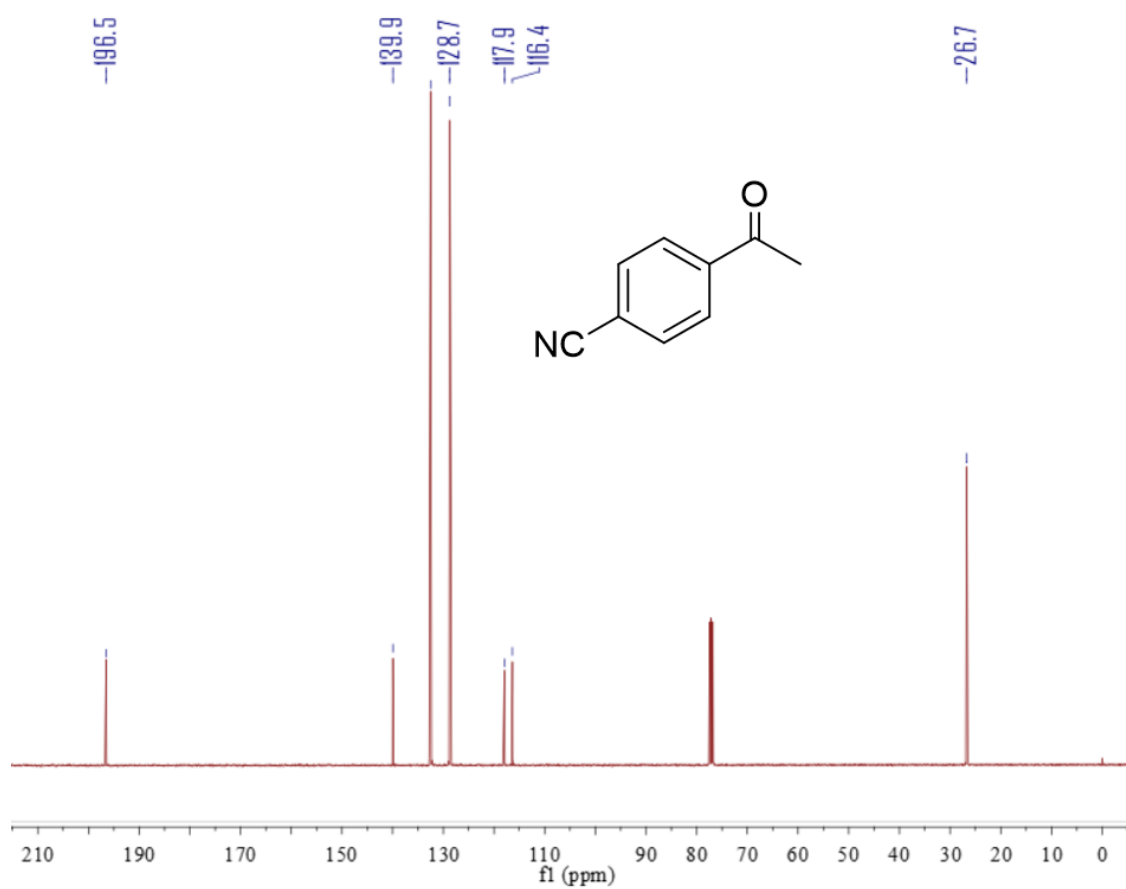

Compound 4j

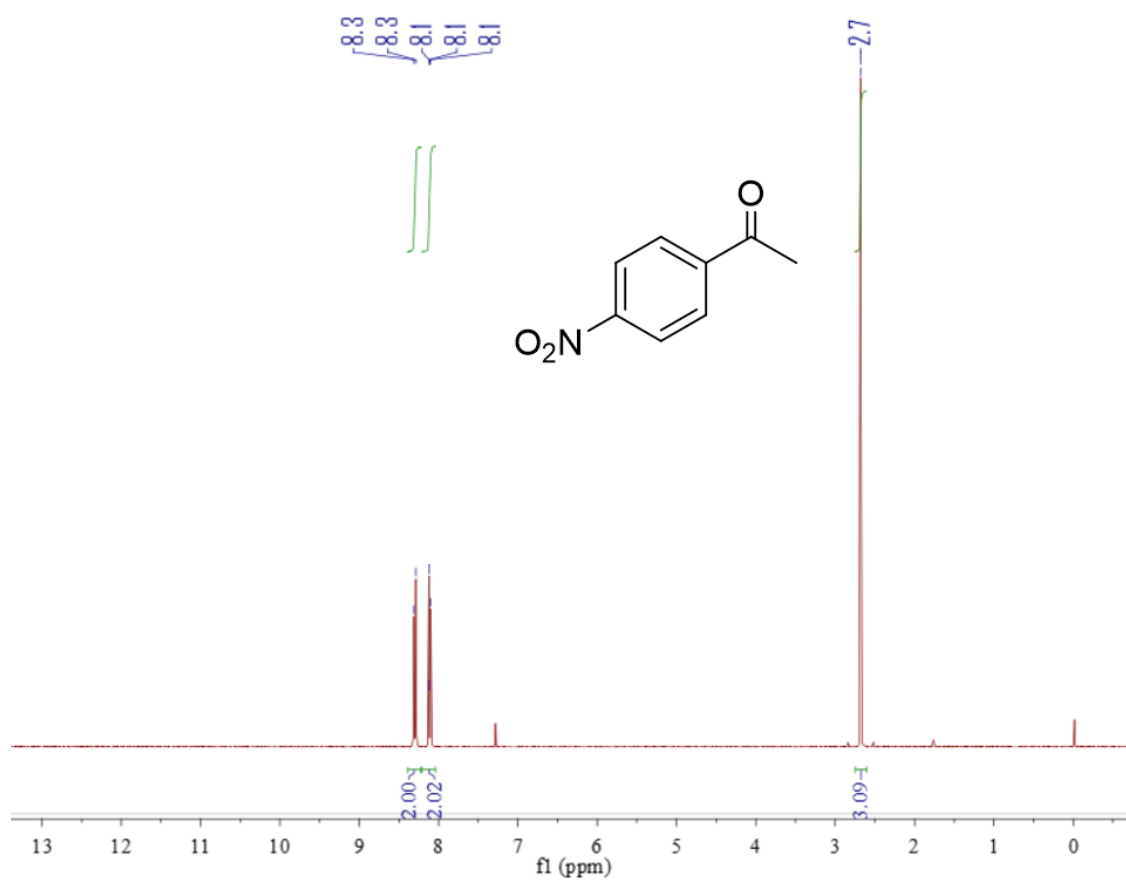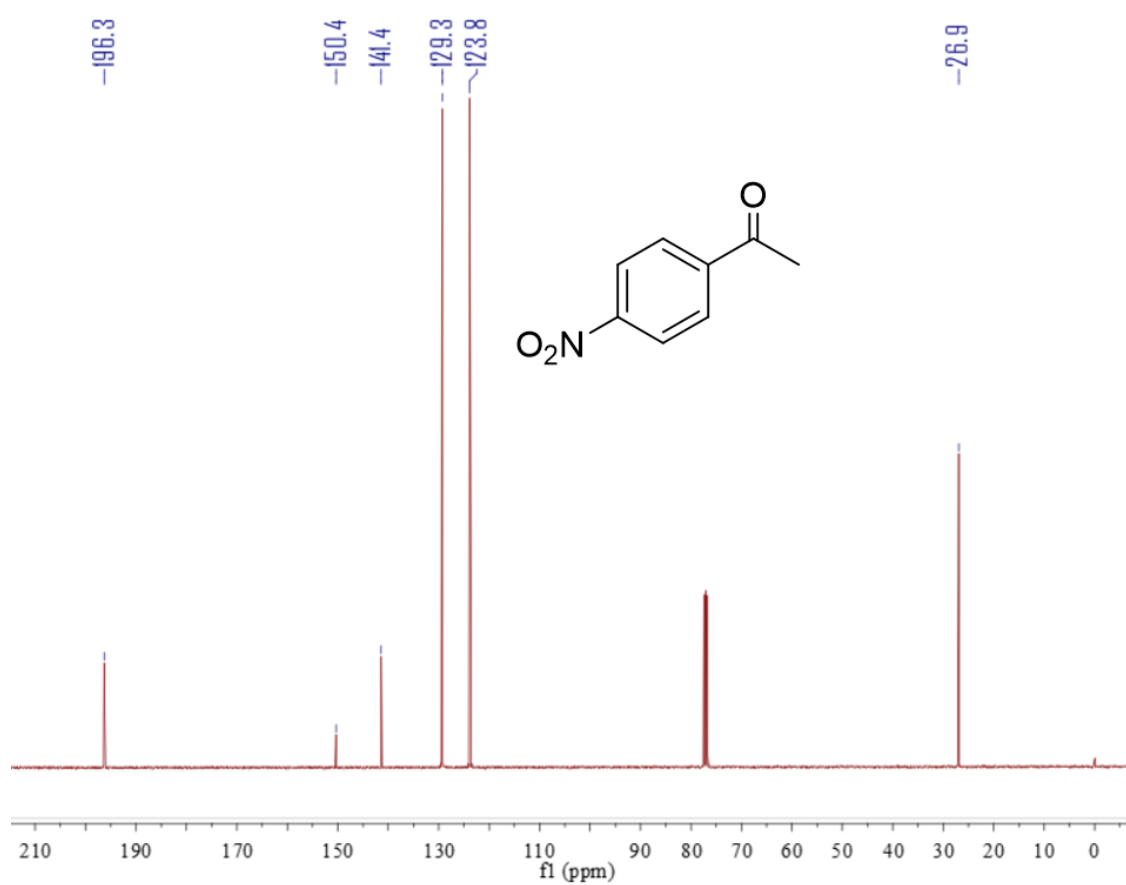

Compound 4k

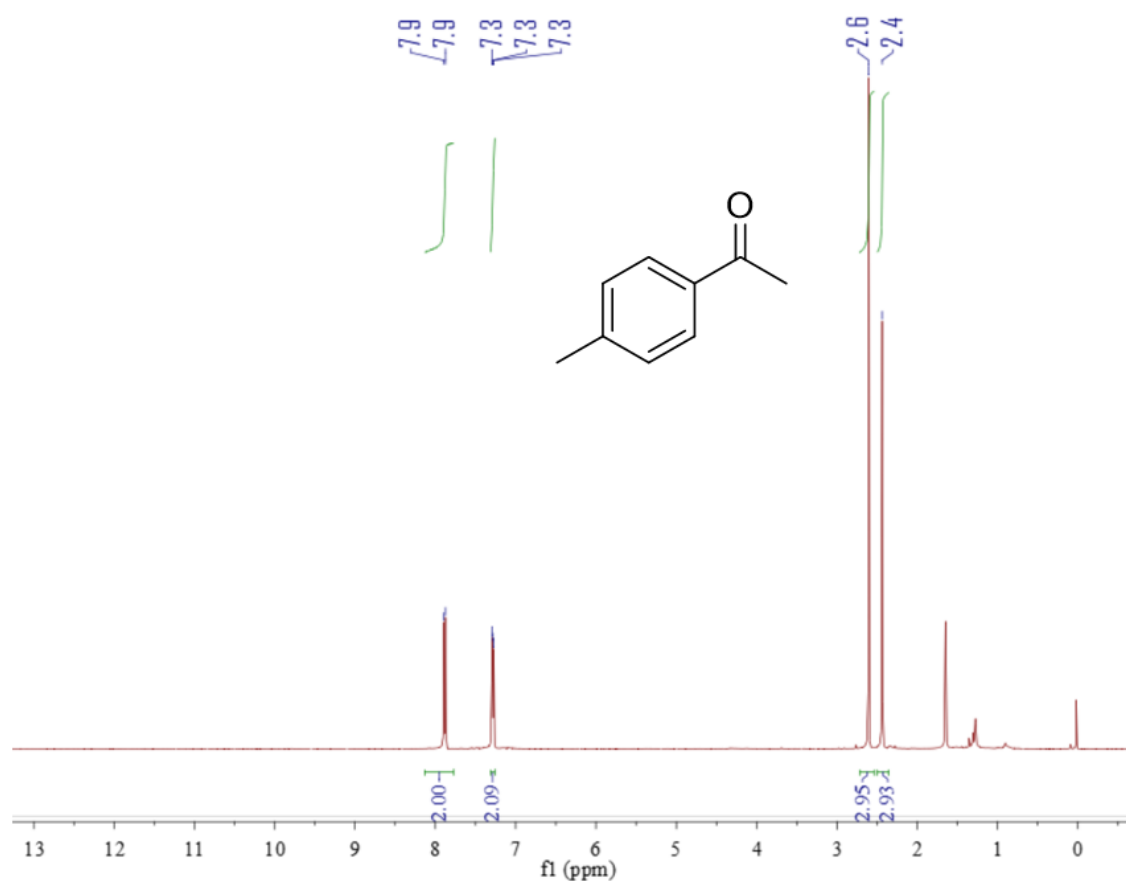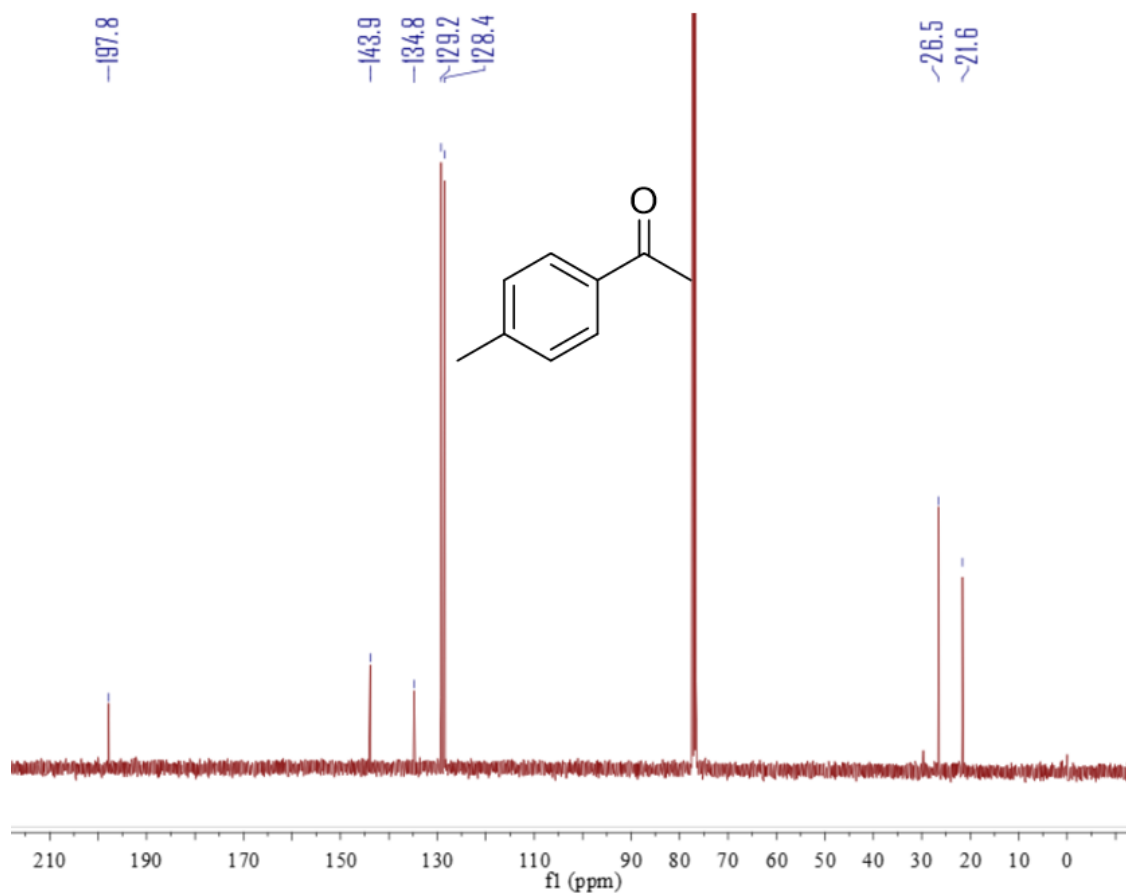

Compound 4l

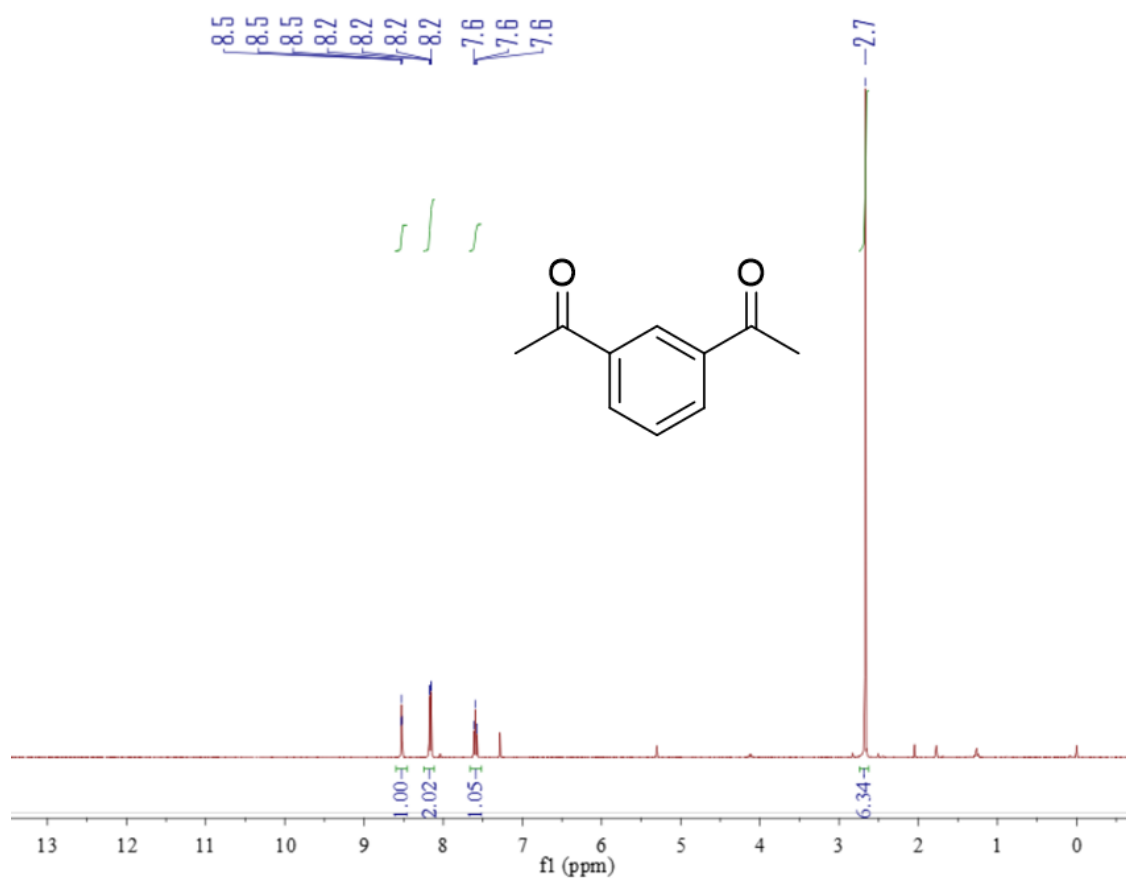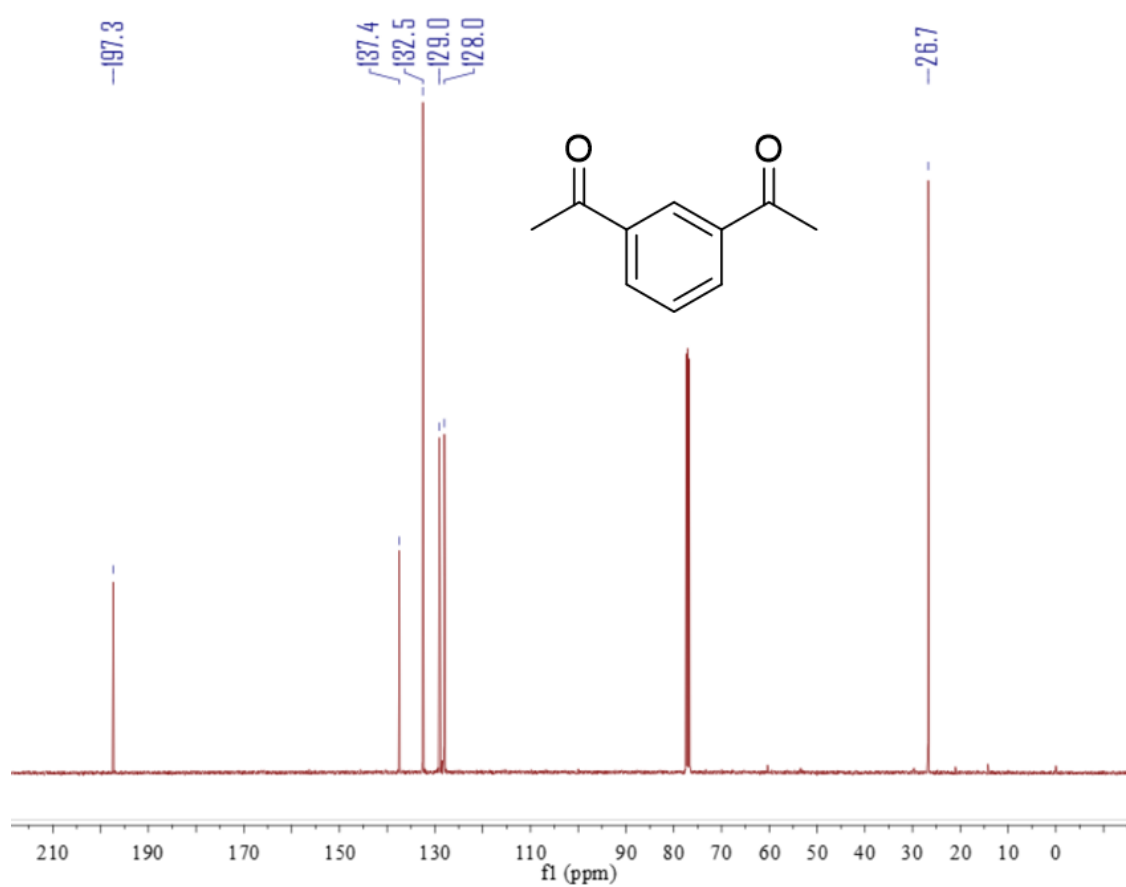

Compound 4m



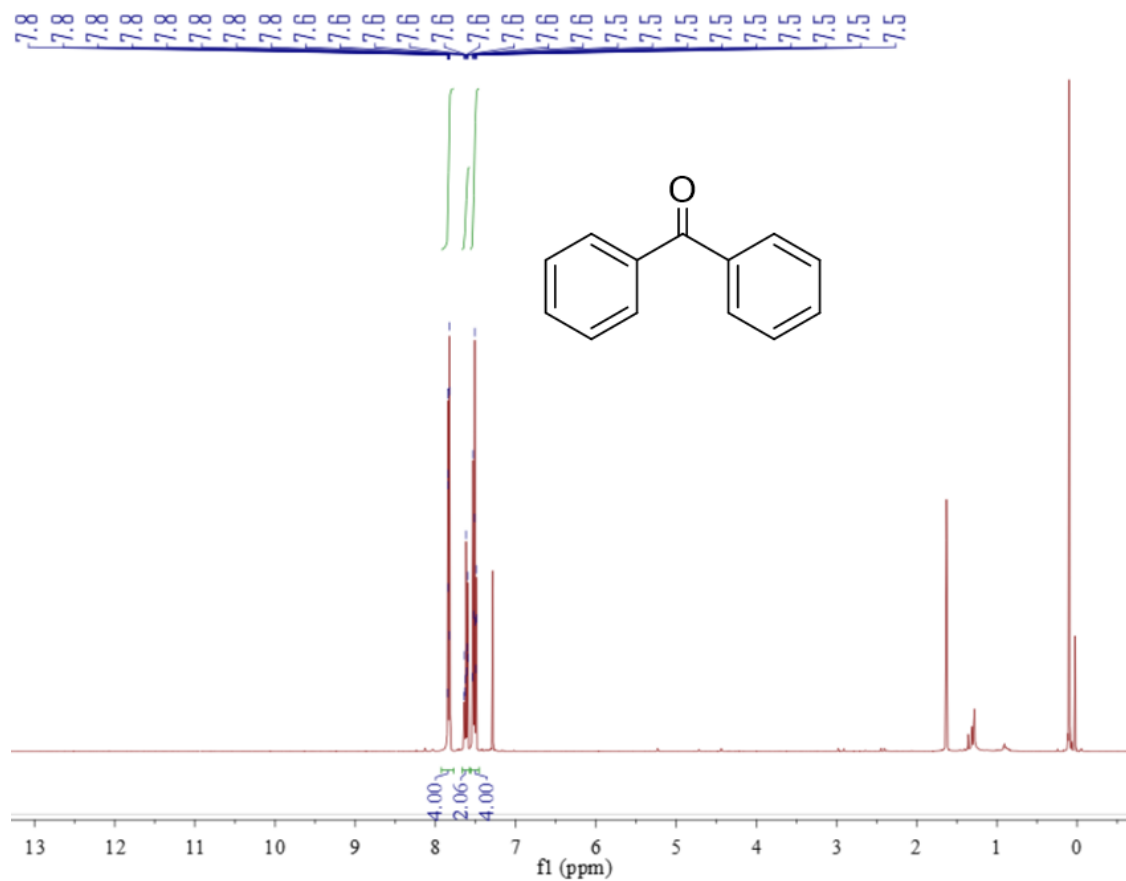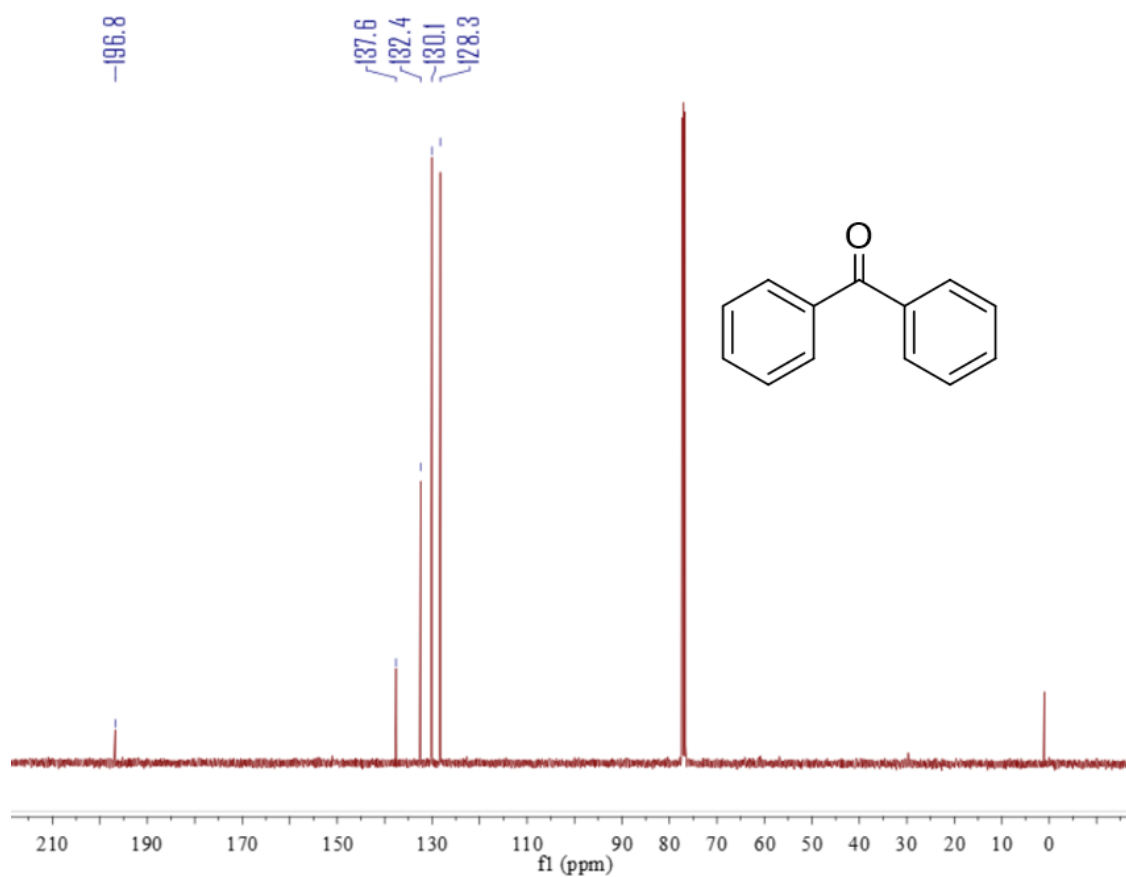

Compound 4n

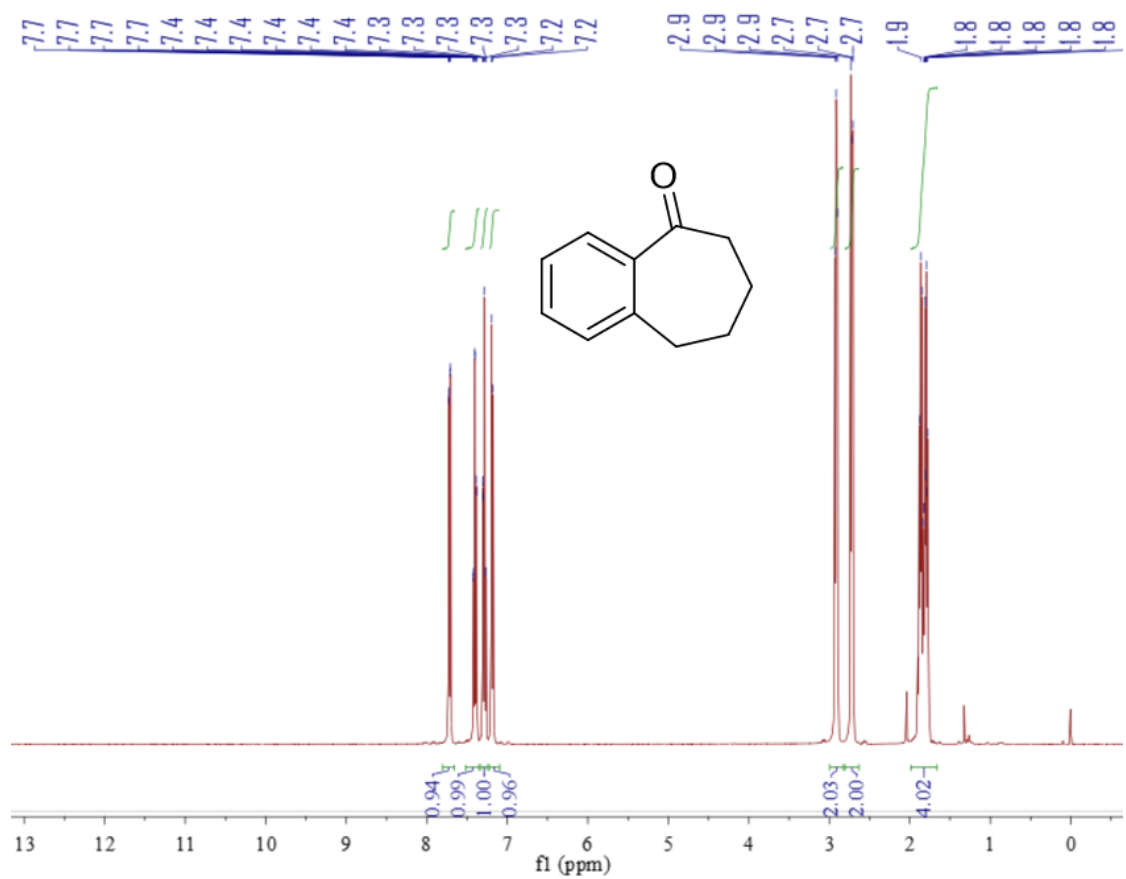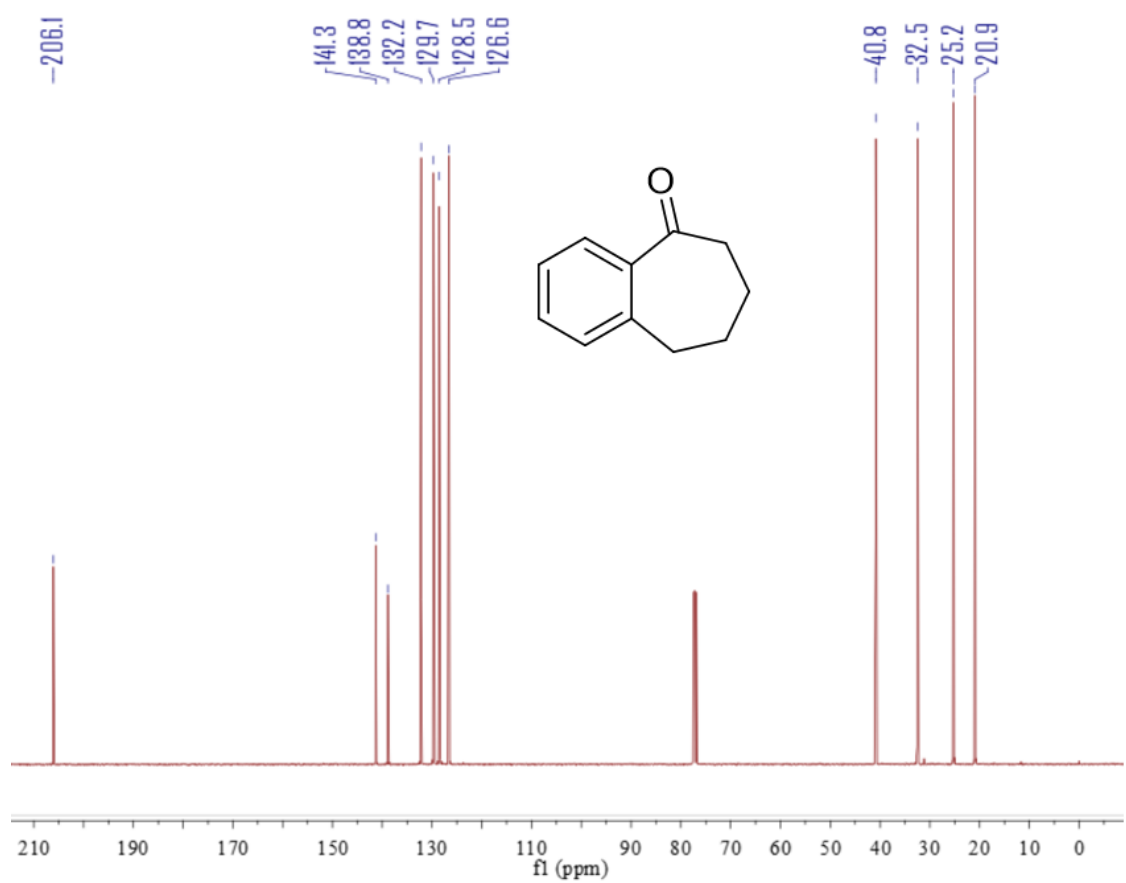

Compound 4o

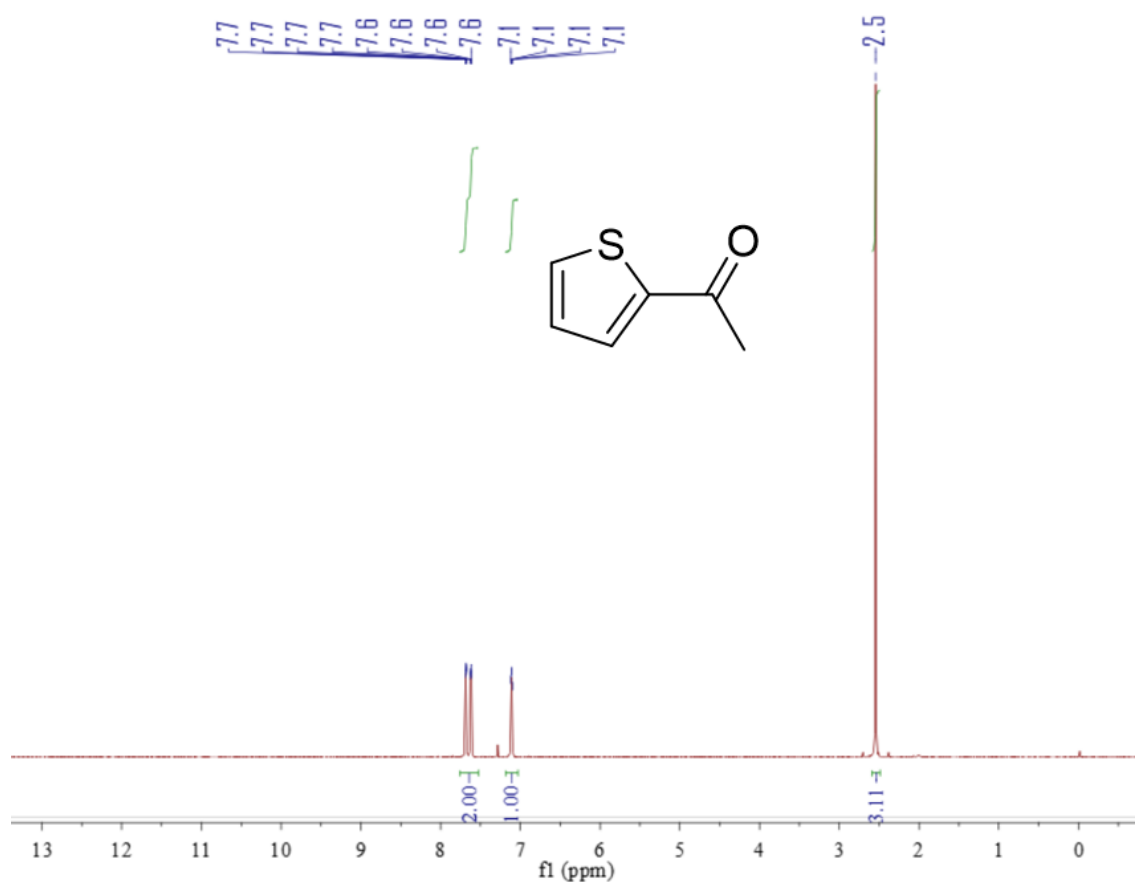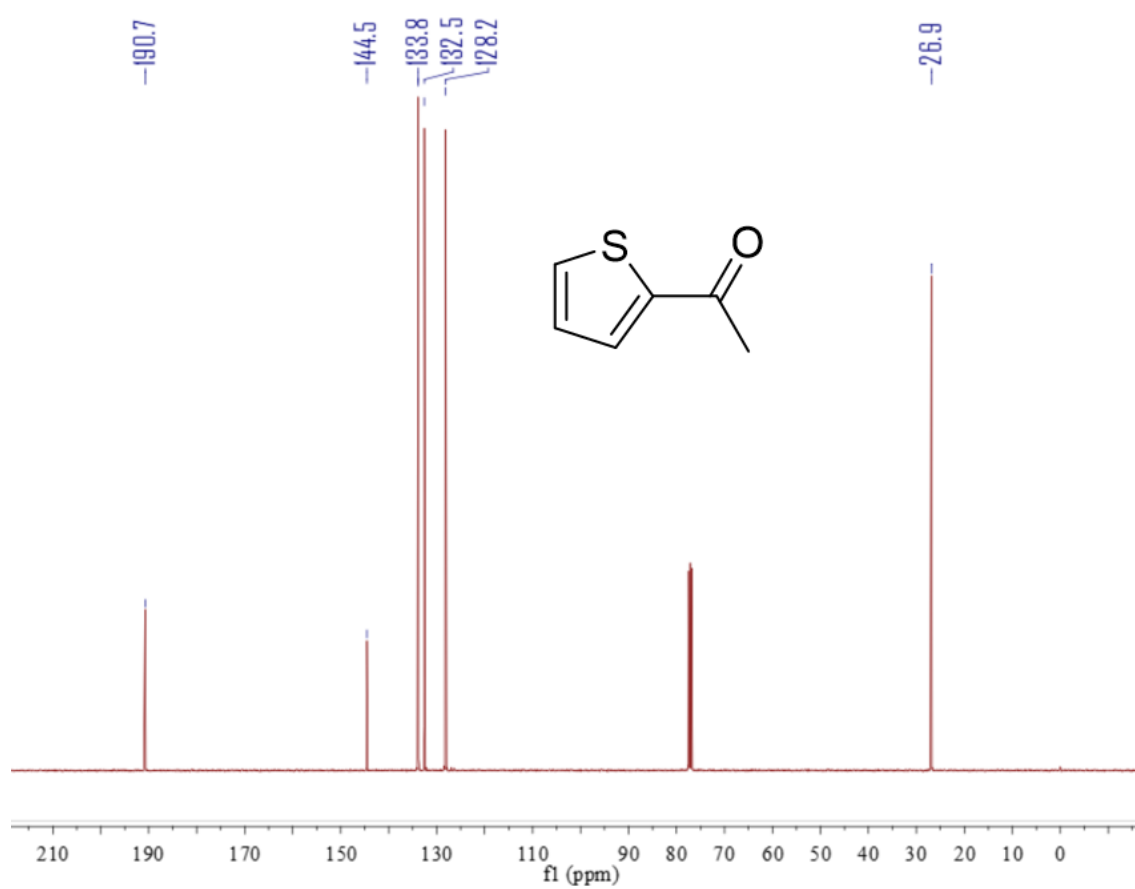

Compound 4p

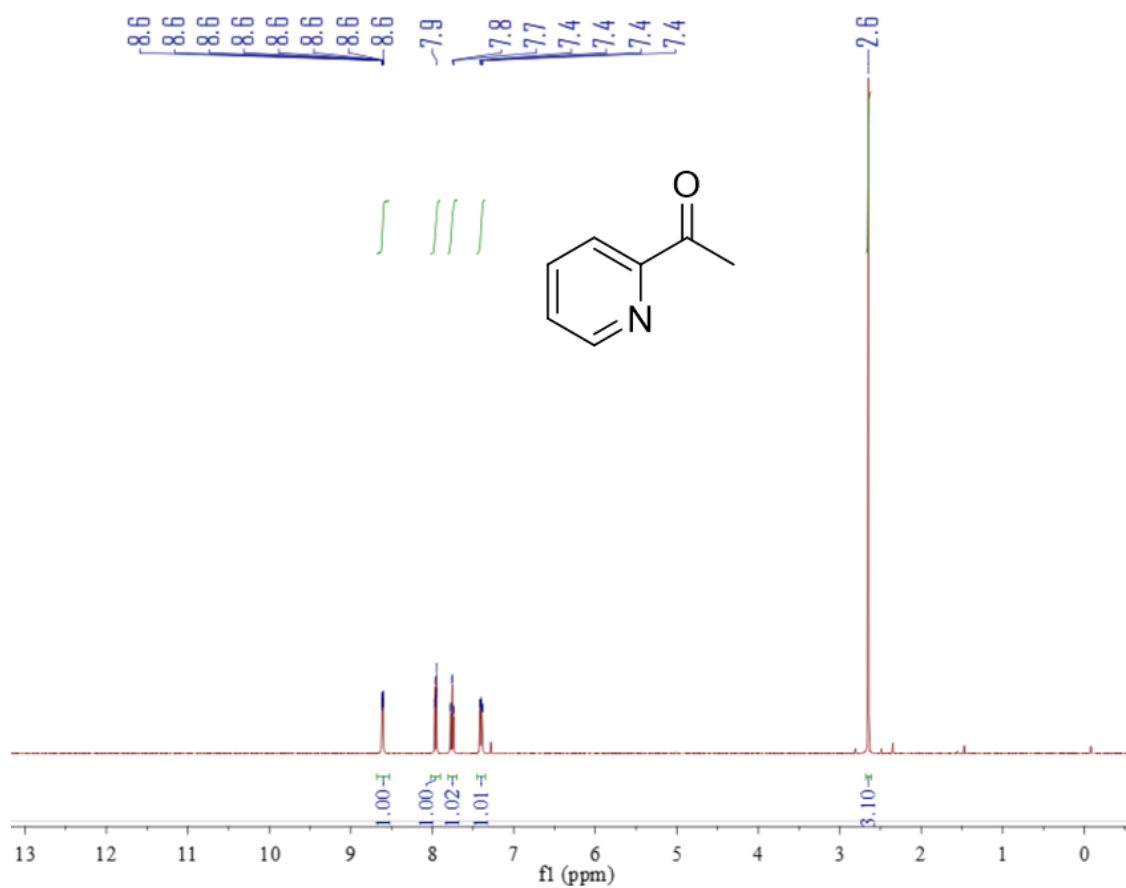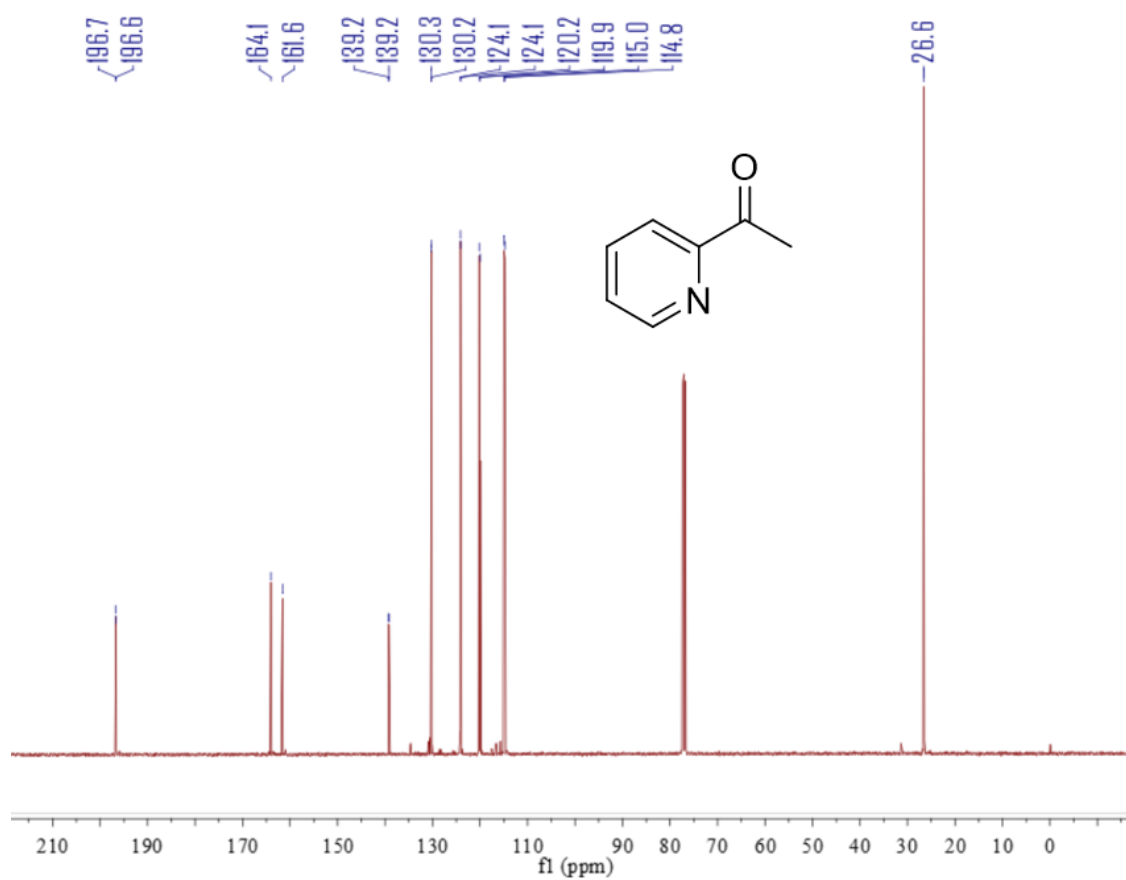

Compound 4q

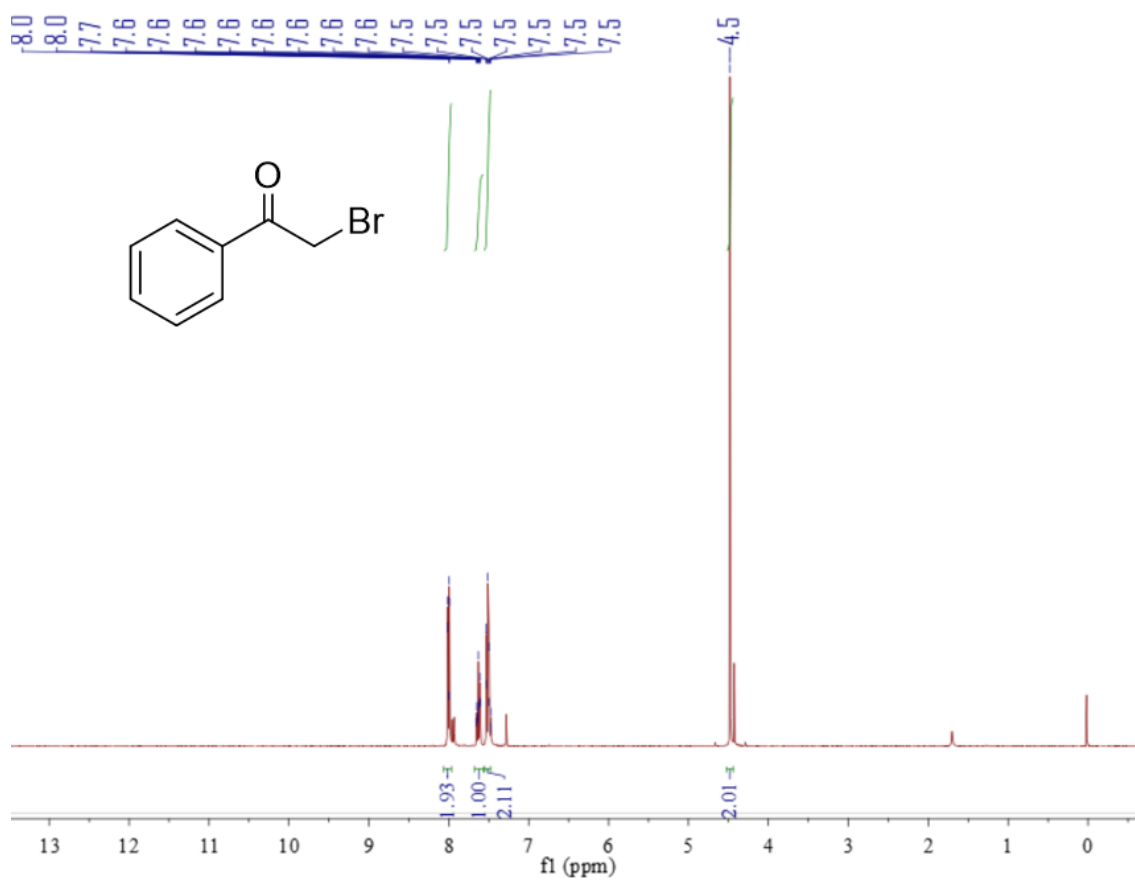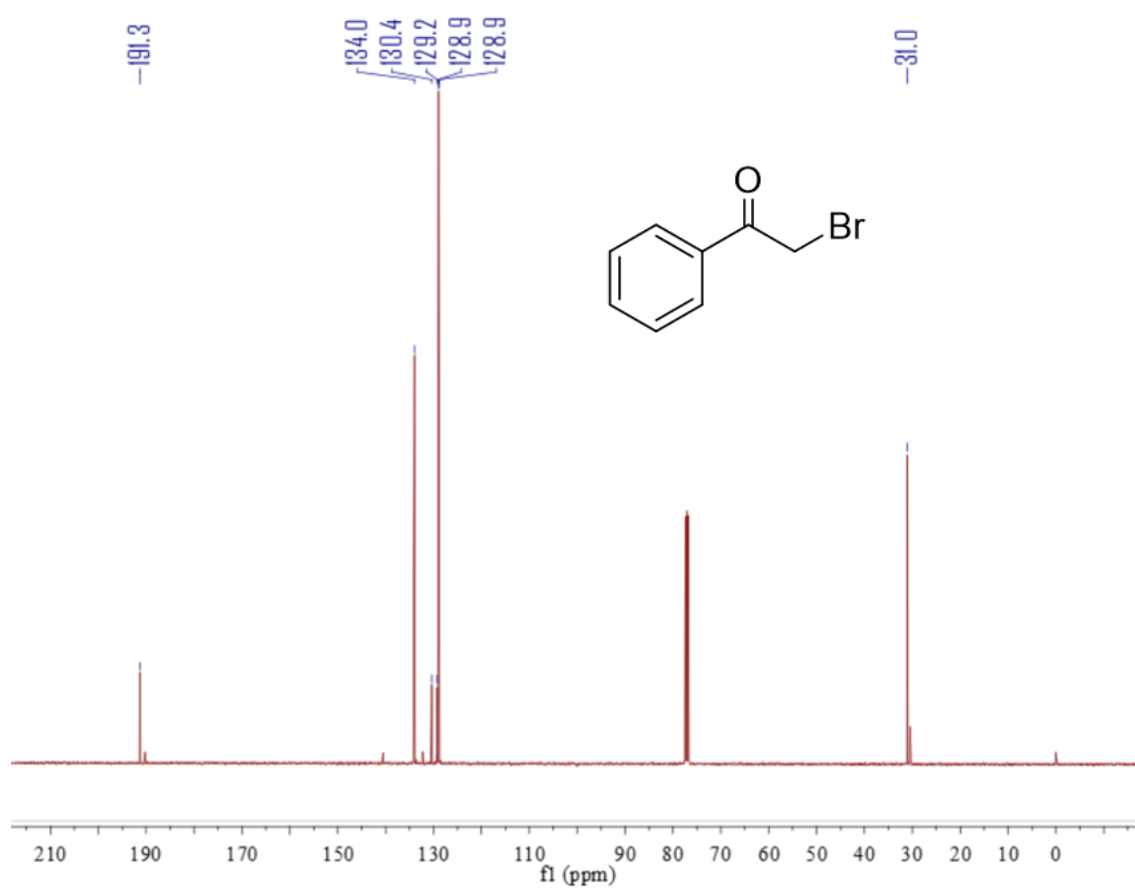

Compound 4r

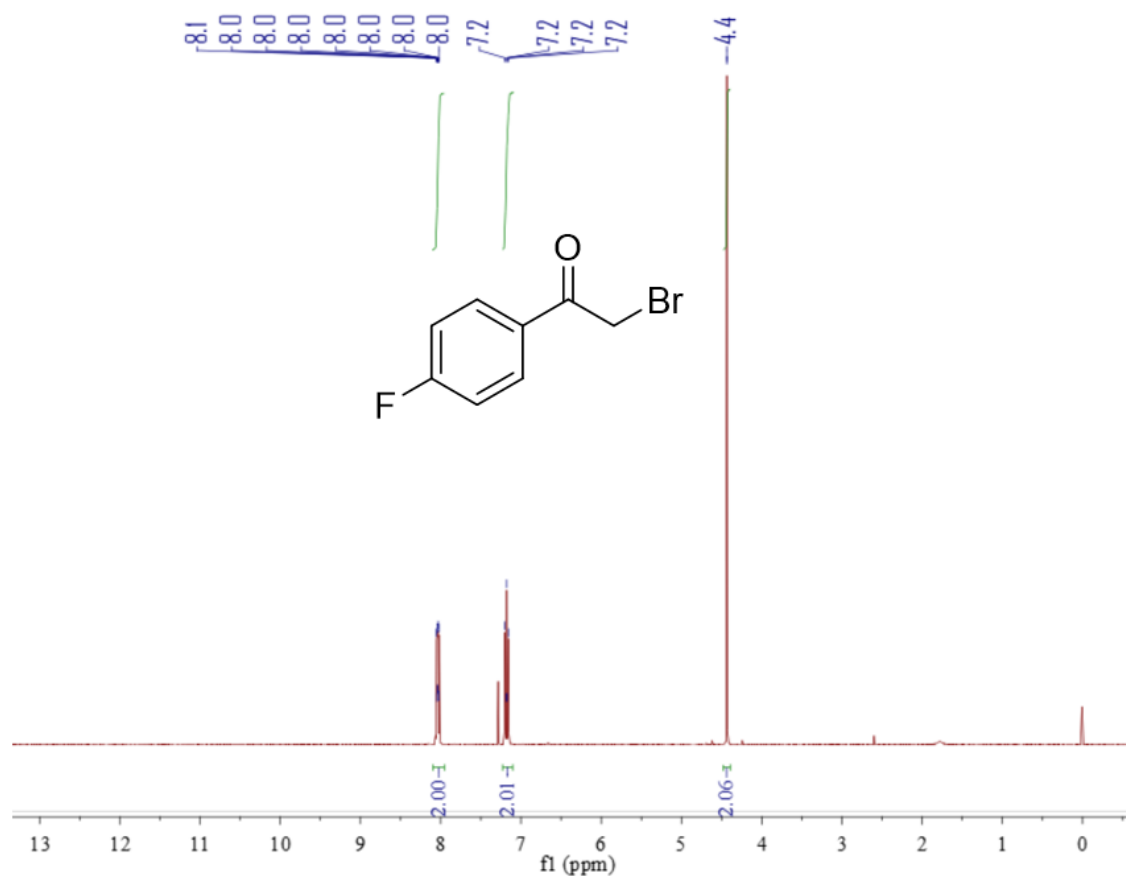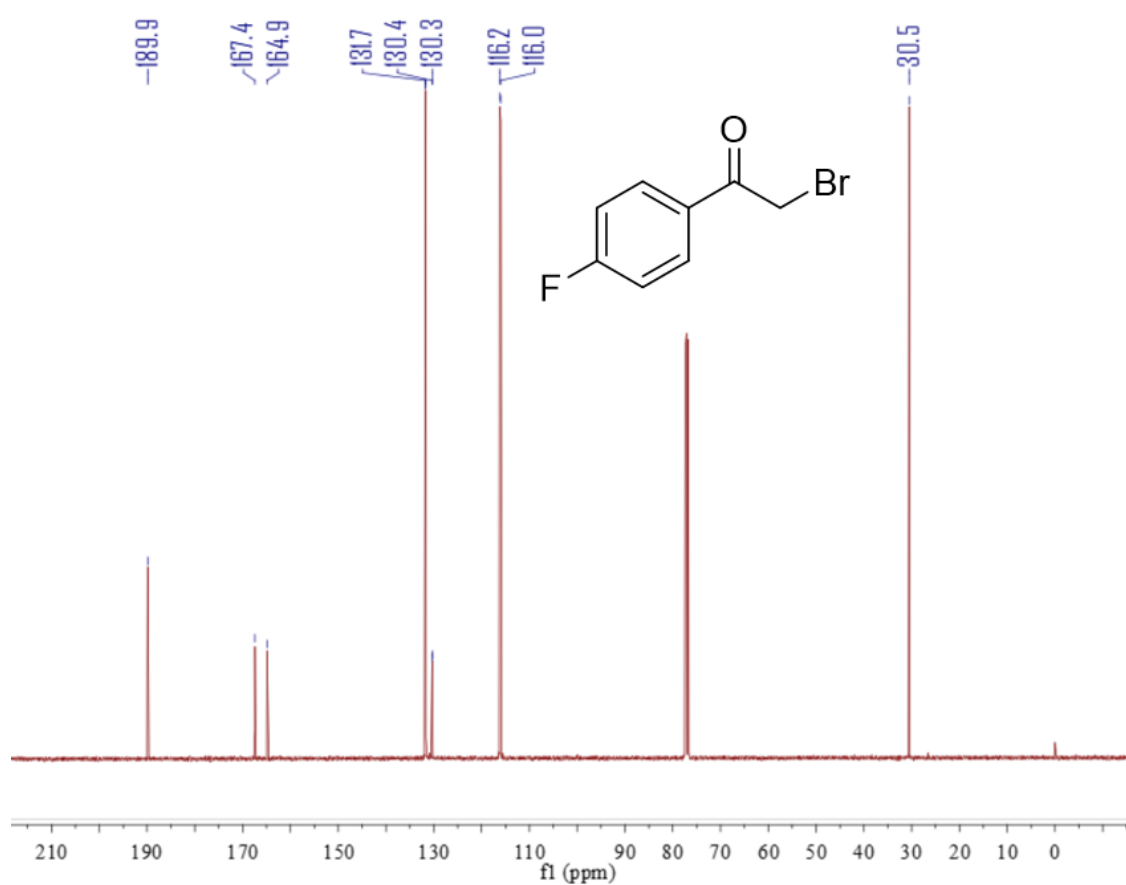

Compound 4s

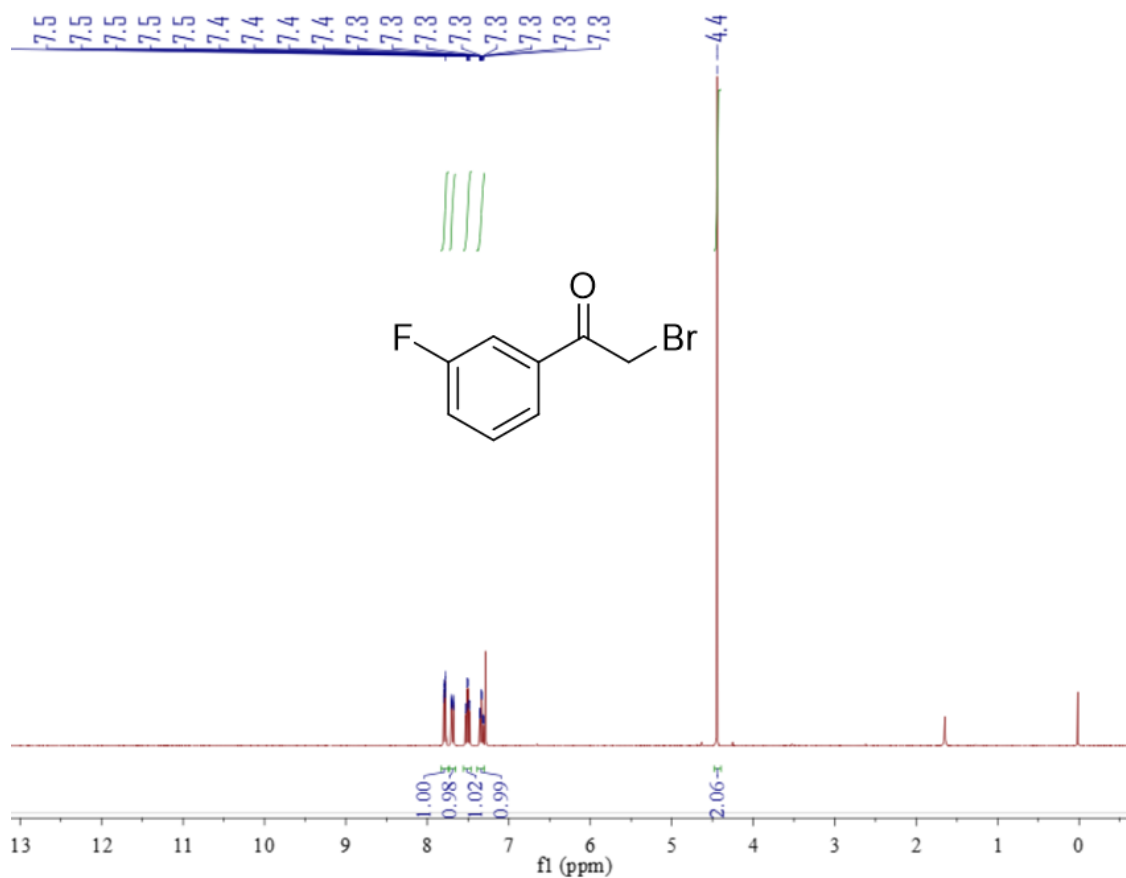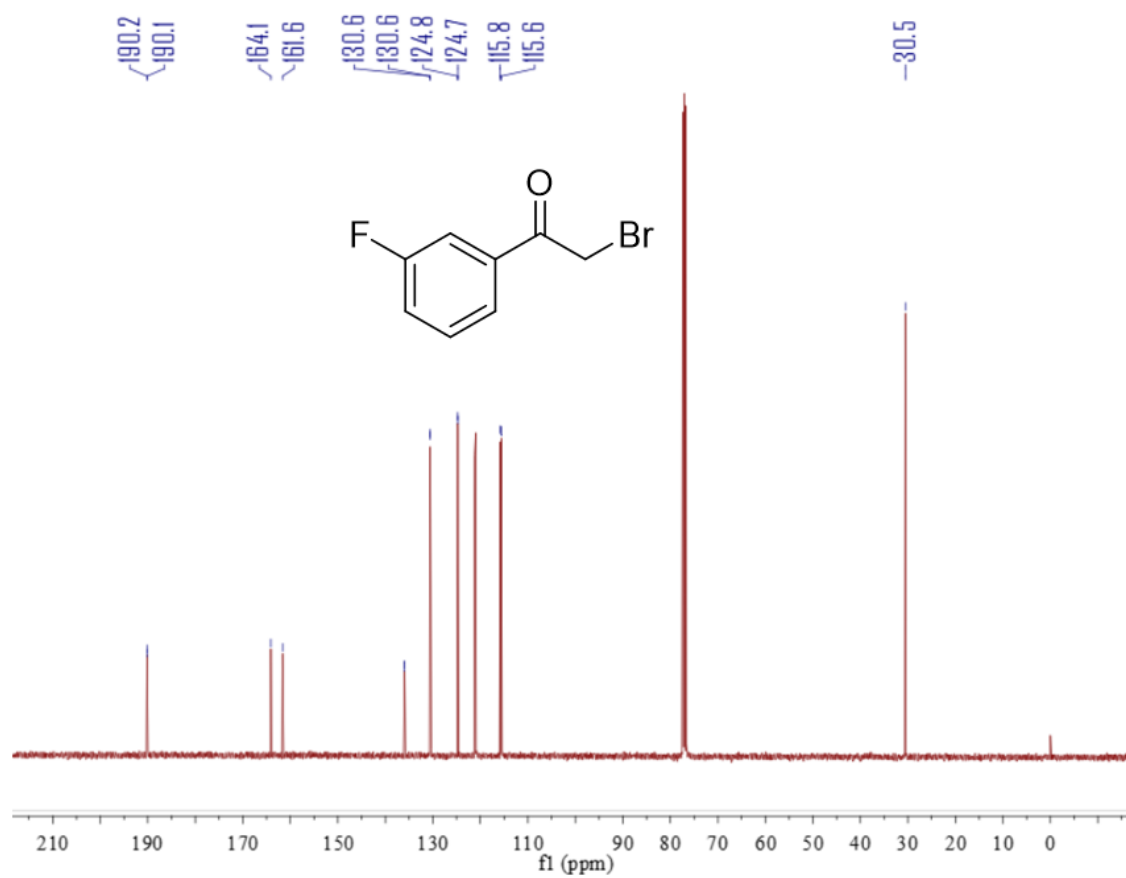

Compound 4t

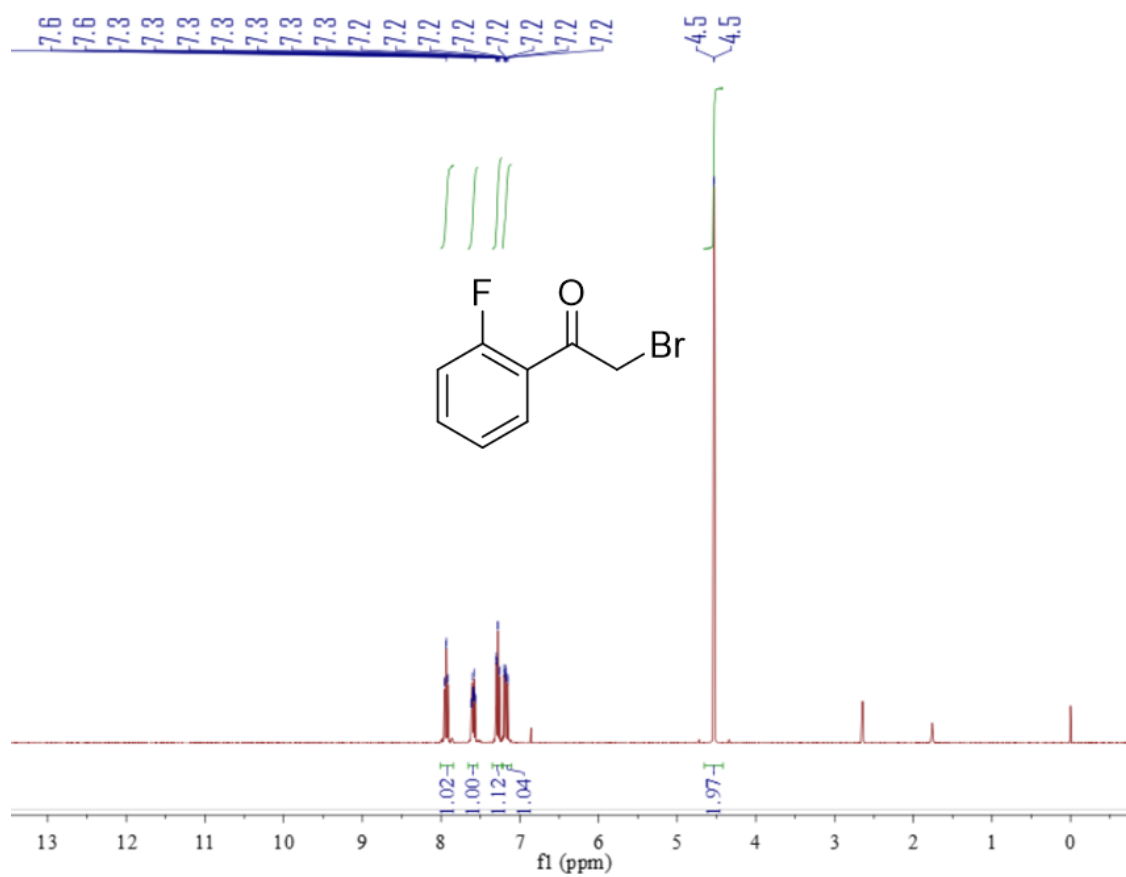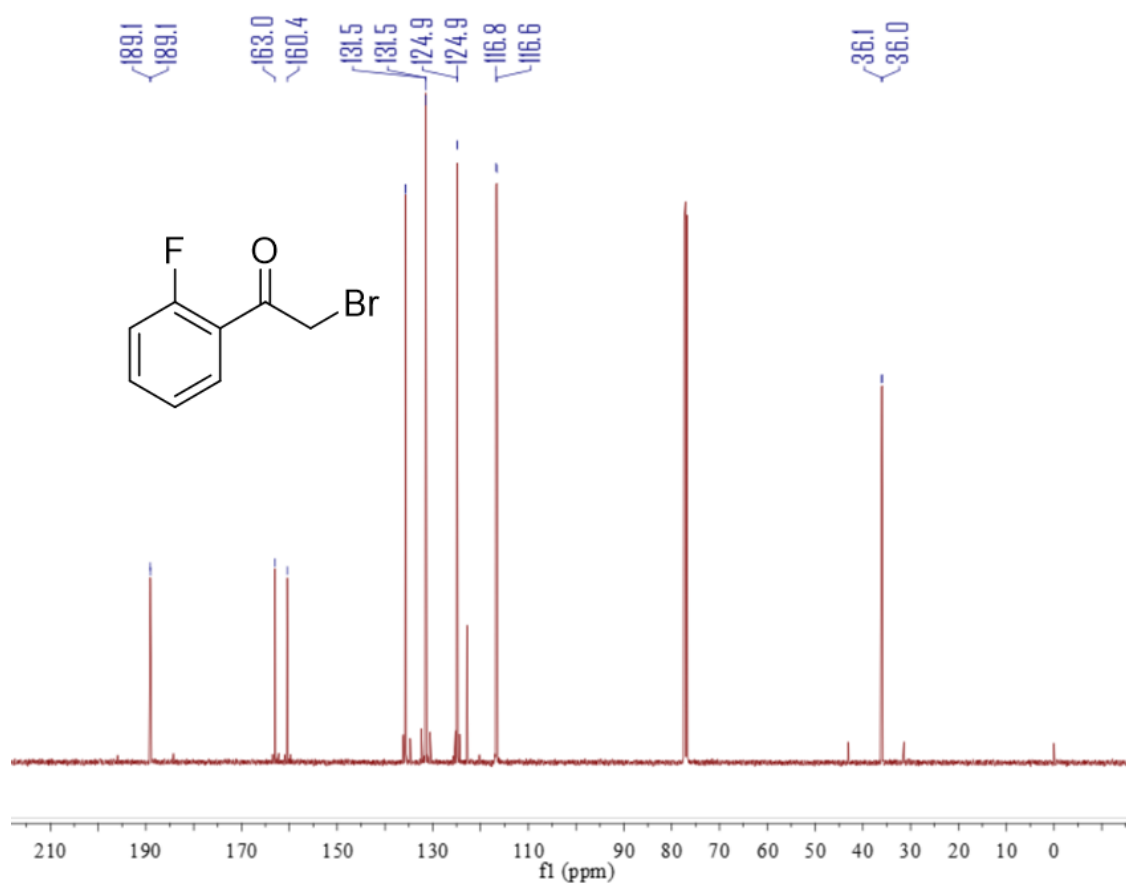

Compound 4u



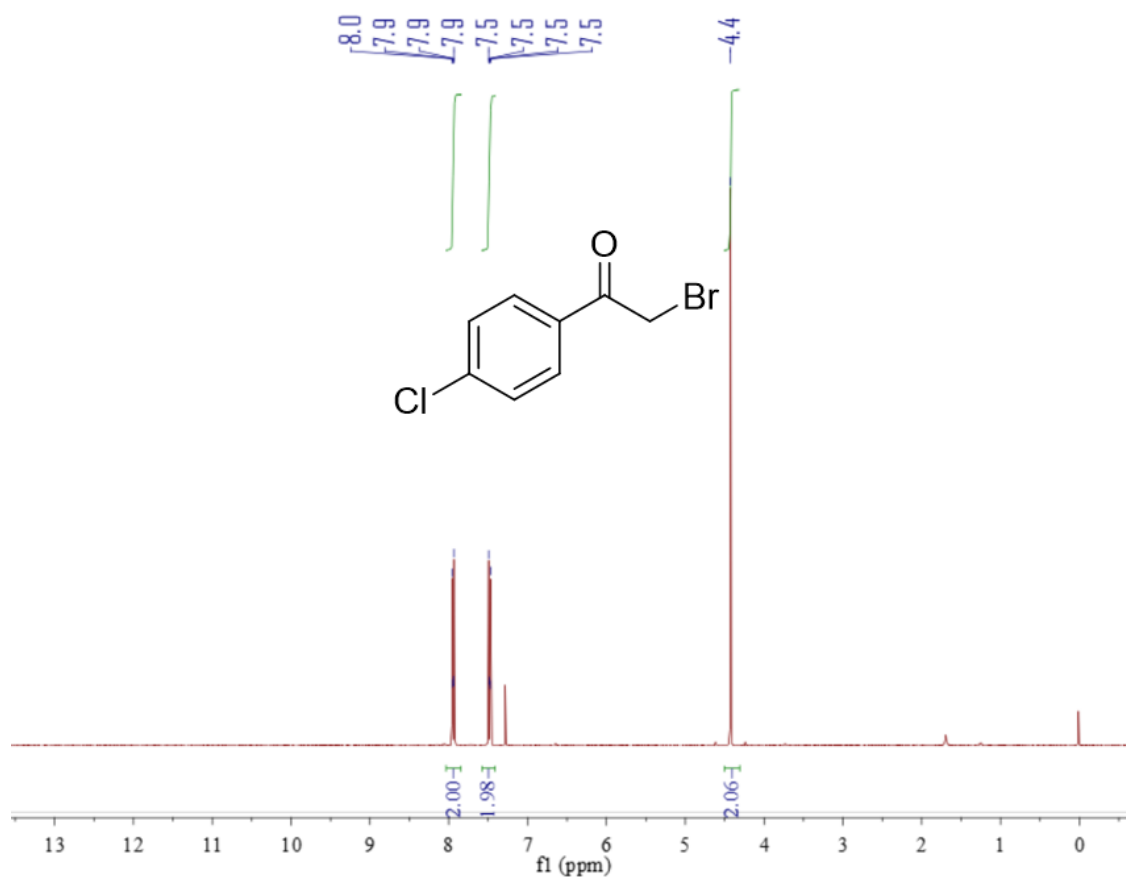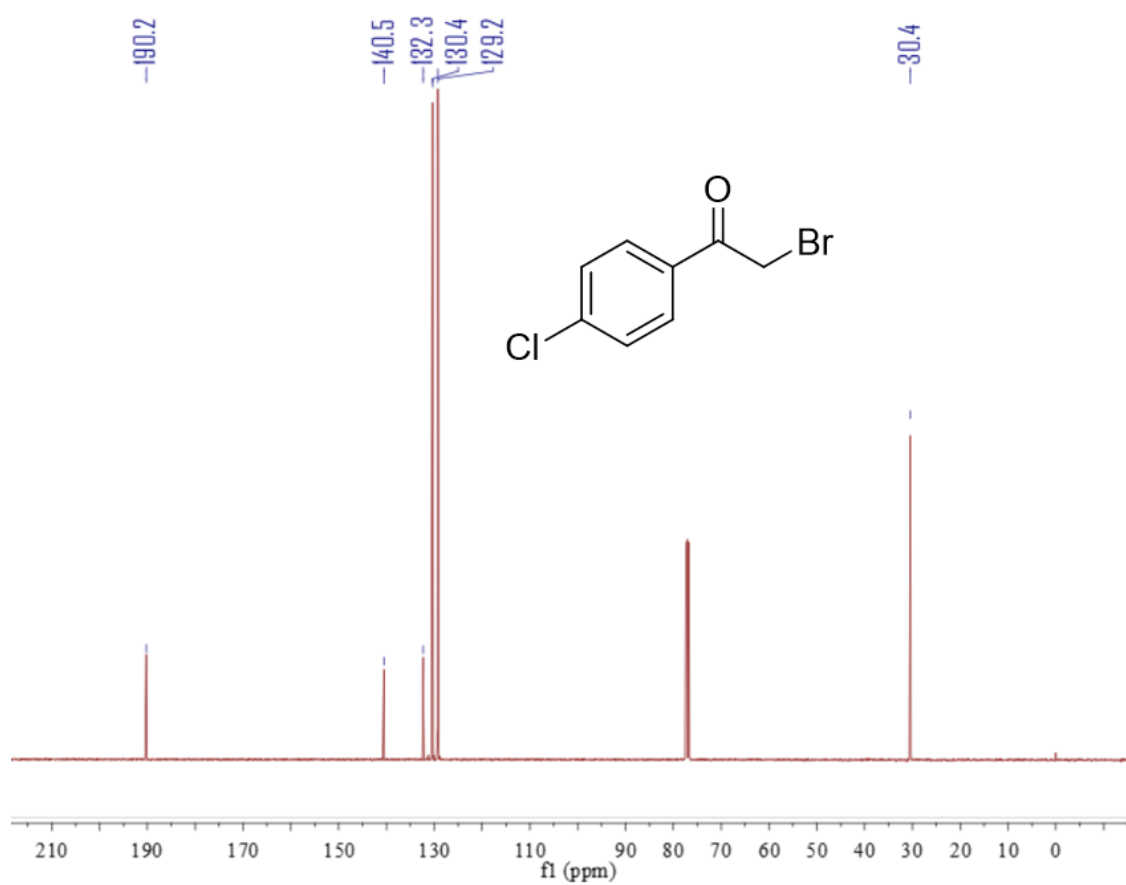

Compound 4v

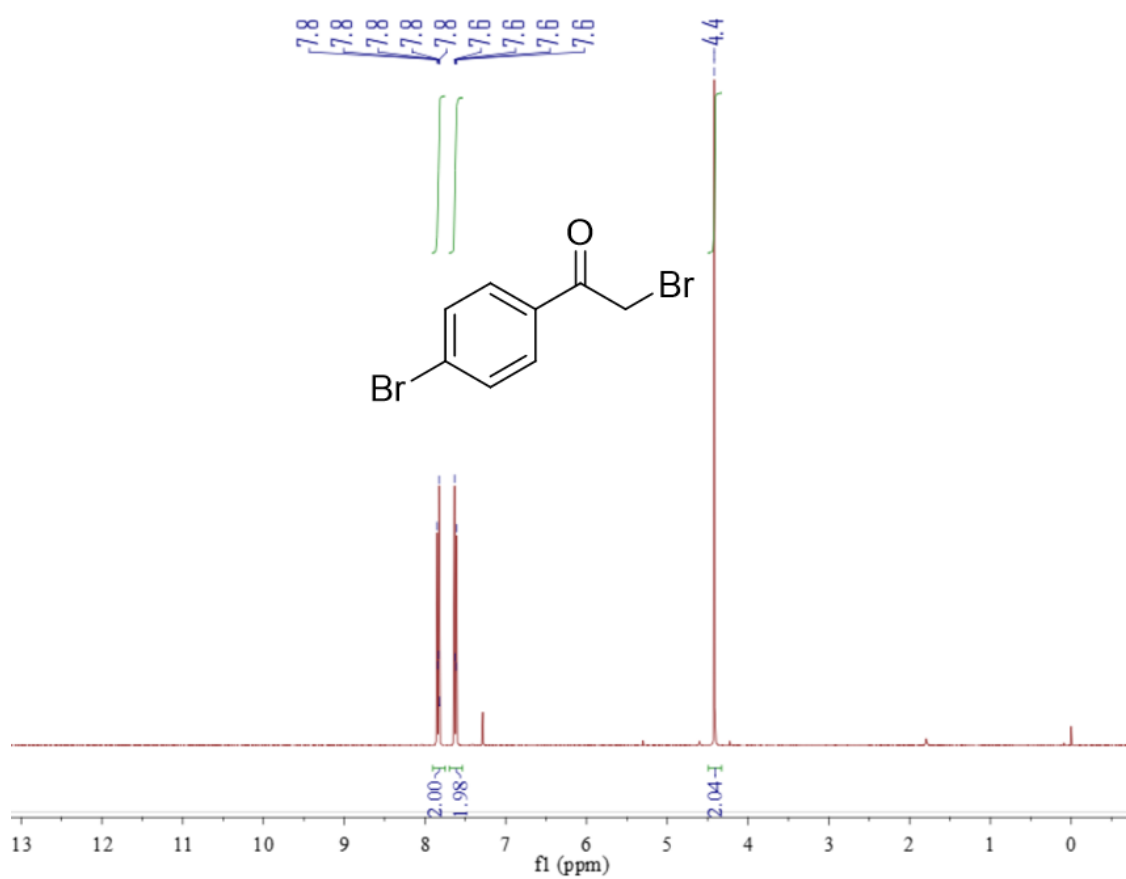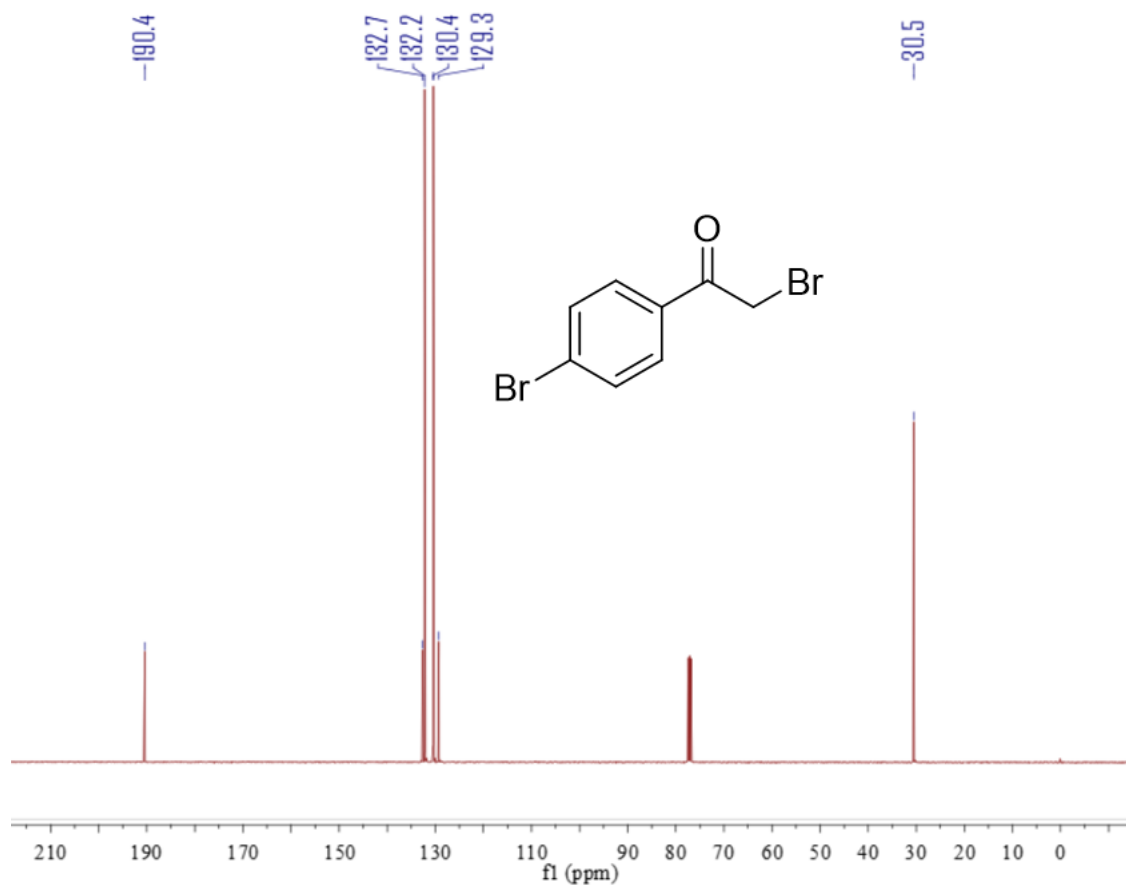

Compound 4w

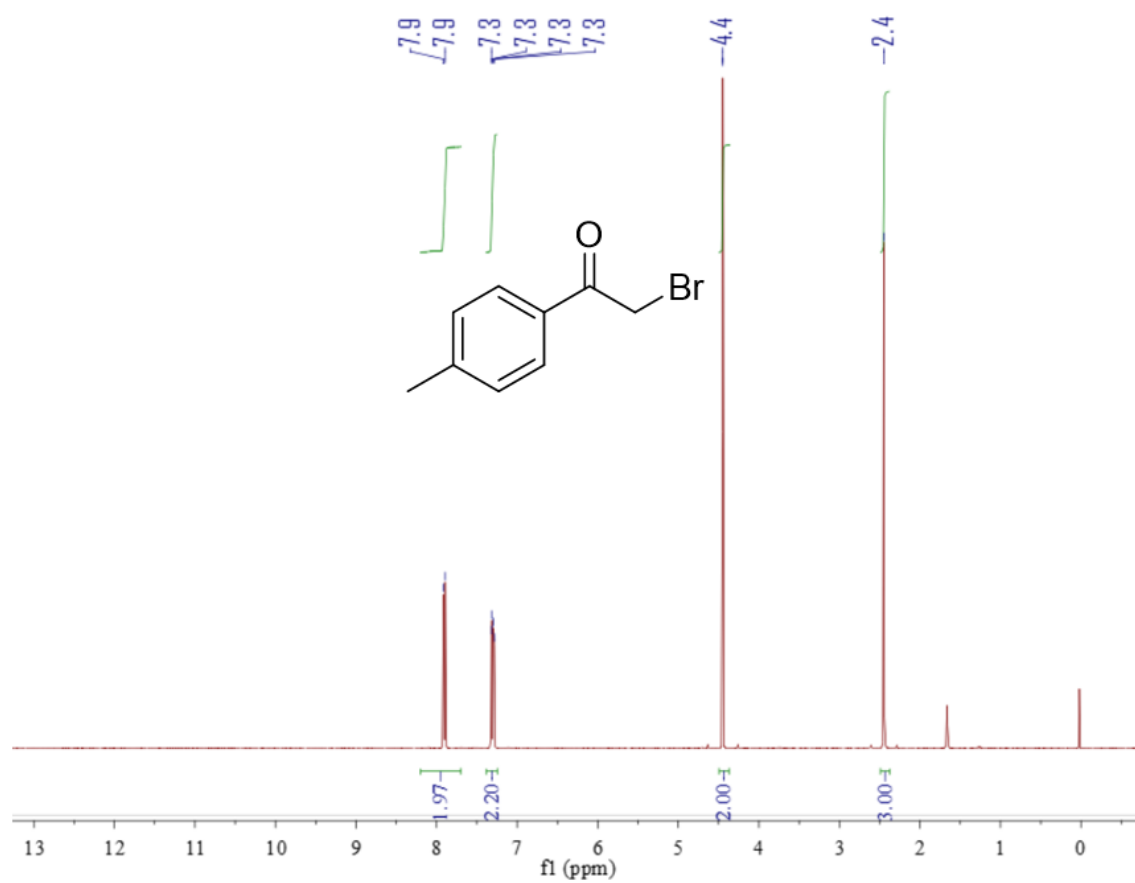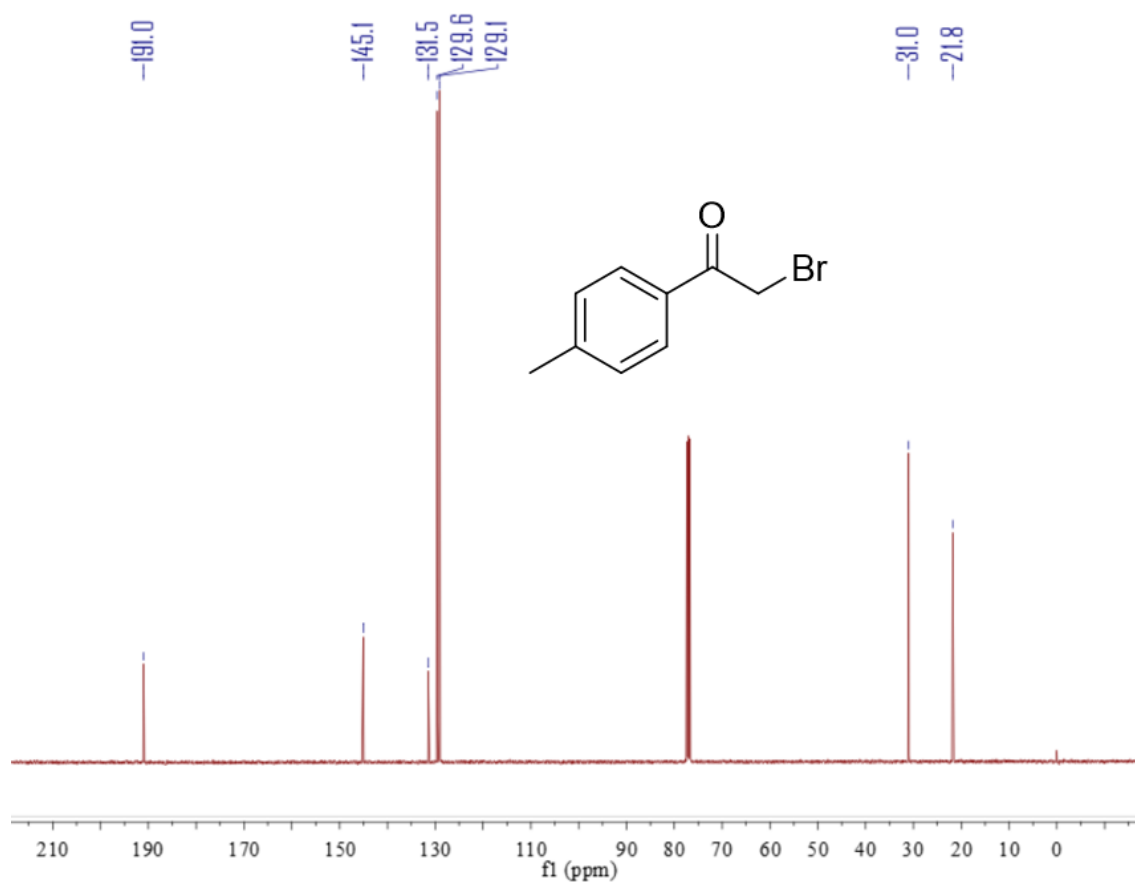

Supplement: d5cy01371b1.pdf [file d5cy01371b1.pdf]
